# Supplementary material for: Regional and temporal variation in the treatment of rheumatoid arthritis across the UK: a descriptive register-based cohort study
Source: PubMed Central journal article supplement — BMJ Open. 2012 Nov 7;2(6):e001603. doi: 10.1136/bmjopen-2012-001603 (PMC3533005; doi:10.1136/bmjopen-2012-001603), 2012-11-07
Supplement: bmjopen-2012-001603.draft_revisions.pdf [file bmjopen-2012-001603.draft_revisions.pdf]

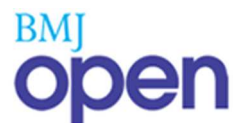

**Regional and temporal variation in the treatment of  
rheumatoid arthritis across the UK: a descriptive register-  
based cohort study**

|                                 |                                                                                                                                                                                                                                                                                                                                                                                                                               |
|---------------------------------|-------------------------------------------------------------------------------------------------------------------------------------------------------------------------------------------------------------------------------------------------------------------------------------------------------------------------------------------------------------------------------------------------------------------------------|
| Journal:                        | <i>BMJ Open</i>                                                                                                                                                                                                                                                                                                                                                                                                               |
| Manuscript ID:                  | bmjopen-2012-001603                                                                                                                                                                                                                                                                                                                                                                                                           |
| Article Type:                   | Research                                                                                                                                                                                                                                                                                                                                                                                                                      |
| Date Submitted by the Author:   | 02-Jun-2012                                                                                                                                                                                                                                                                                                                                                                                                                   |
| Complete List of Authors:       | Edwards, Christopher; University Hospital Southampton NHS Foundation Trust, Rheumatology<br>Campbell, Jennifer; General Practice Research Database, Medicines and Healthcare products Regulatory Agency,<br>van Staa, Tjeerd; General Practice Research Database, Medicines and Healthcare products Regulatory Agency, ; Utrecht Institute for Pharmaceutical Sciences,<br>Arden, Nigel; Nuffield Department of Orthopaedics, |
| <b>Primary Subject Heading</b>: | Rheumatology                                                                                                                                                                                                                                                                                                                                                                                                                  |
| Secondary Subject Heading:      | General practice / Family practice                                                                                                                                                                                                                                                                                                                                                                                            |
| Keywords:                       | Rheumatology < INTERNAL MEDICINE, PRIMARY CARE, RHEUMATOLOGY                                                                                                                                                                                                                                                                                                                                                                  |
|                                 |                                                                                                                                                                                                                                                                                                                                                                                                                               |

SCHOLARONE™  
Manuscripts

1  
2  
3 **Regional and temporal variation in the treatment of rheumatoid arthritis across the UK: a**  
4 **descriptive register-based cohort study**  
5  
6  
7

8 **Authors**

9 Christopher J Edwards *consultant rheumatologist*<sup>1,2</sup>, Jennifer Campbell *research scientist*<sup>3</sup>, Tjeerd  
10 Van Staa *head of research*<sup>3,4</sup>, Nigel K Arden *professor of rheumatology*<sup>2,5</sup>.  
11  
12

13  
14 <sup>1</sup>Department of Rheumatology, University Hospital Southampton NHS Foundation Trust,  
15 Southampton, United Kingdom, SO16 6YD; <sup>2</sup>University of Southampton, Southampton, United  
16 Kingdom SO16 6YD; <sup>3</sup>General Practice Research Database, Medicines and Healthcare products  
17 Regulatory Agency, London, United Kingdom SW1W 9SZ; <sup>4</sup>Utrecht Institute for Pharmaceutical  
18 Sciences, Utrecht University, Utrecht, the Netherlands; <sup>5</sup>Nuffield Department of Orthopaedics,  
19 Rheumatology and Musculoskeletal Sciences, University of Oxford, United Kingdom OX3 7HE.  
20  
21  
22  
23

24 Correspondence to: Christopher J Edwards [cedwards@soton.ac.uk](mailto:cedwards@soton.ac.uk)  
25  
26  
27  
28  
29  
30  
31  
32  
33  
34  
35  
36  
37  
38  
39  
40  
41  
42  
43  
44  
45  
46  
47  
48  
49  
50  
51  
52  
53  
54  
55  
56  
57  
58  
59  
60

## Abstract

**Objectives:** To describe current DMARD prescription in rheumatoid arthritis (RA) with reference to best practice and to identify temporal and regional trends in the UK

**Design:** Descriptive, register-based cohort study

**Participants:** Permanently registered patients aged  $\geq 18$  years with a recorded diagnosis of RA between 01/01/1995 and 31/03/2010 and matched controls. Participants with RA were identified through screening of all patients in the General Practice Research Database (GPRD) with a clinical or referral record for RA and at least one day of follow-up.

**Setting:** 639 general practices in the UK supplying data to the GPRD

**Main outcome measures:** Medication prescribing between 3 and 12 months of RA diagnosis by region and time period (1995–1999, 2000–2005, and 2006–April 2010).

**Results:** Of the 35,911 patients in the full RA cohort, 15,259 patients (42%) had incident RA. Analysis of prescribing in incident RA patients demonstrated that between 1995 (baseline) and 2010 there was a substantial increase in DMARD, and specifically methotrexate, prescribing across all regions with a less marked increase in combination DMARD prescribing. Taking 12-month prescribing as a snapshot: DMARD prescribing was 19–49% at baseline increasing to 45–74% by 2006–April 2010; methotrexate prescribing was 4–16% at baseline increasing to 32–60%; combination DMARD prescribing was 0–8% at baseline increasing to 3–17%. However there was marked regional variation in the proportion of RA patients receiving DMARD regardless of time period.

**Conclusions:** There has been a substantial increase in prescribing of DMARDs for RA since 1995; however regional variation persists across the UK with relative under-treatment, according to best practice and published national guidelines. Improved implementation of evidence-based best clinical practice to facilitate removal of treatment variation is warranted.

**Key words:** *Rheumatoid arthritis, DMARDs, General Practice Research Database, regional variation.*

## Article summary

### Article focus:

- Over recent years there have been fundamental changes in the approach to treatment of rheumatoid arthritis (RA) with a move towards early and more aggressive treatment
- Disease-modifying anti-rheumatic drugs (DMARDs) are effective in the treatment of RA and their early use is recommended in national and international clinical guidelines and recommendations.
- We describe both temporal and regional trends in DMARD therapy for RA throughout the UK over a 15-year period and reveal whether the latest knowledge on how RA should be treated has been translated into actual clinical practice

### Key messages:

- There has been a substantial increase in DMARD prescription for RA and an increase in the proportion of patients prescribed DMARD earlier in the course of their disease between 1995 and 2010
- However, RA remains relatively under-treated according to best practice and published national guidelines, and regional variation persists
- There is a need to optimise dissemination and implementation of high-quality clinical guidelines and to monitor implementation.

### Strengths and limitations of this study:

- One of the strengths of the study was the size of the study population with 15,259 patients with incident RA and of the long-term follow-up of these patients (mean 5.5 years but up to 15.3 years for some patients). Another is the generalisability of the General Practice Research Database (GPRD) database from which our data was obtained.
- The coding of the diagnosis of RA is a potential limitation; however, GPRD has been validated in previous studies and in this study by the observation of similar demographics for DMARD versus non-DMARD users.

## Introduction

Rheumatoid arthritis (RA) is a chronic, systemic, autoimmune disease, the most common form of chronic joint inflammation [1], and is associated with substantial long-term morbidity, mortality and health-care costs [2]. A recent report from the National Audit Office (NAO) estimates that around 580,000 people have RA in England and that 26,000 patients are diagnosed with RA each year [3]. RA can have a profound effect on patients through the physical manifestations of the disease, associated complications and impact on health-related quality of life (HRQOL) [4]. Disease-modifying anti-rheumatic drugs (DMARDs), used either as monotherapy or in combination, can control disease activity, reduce joint erosions [5], improve quality of life [6] and also reduce the cardiovascular morbidity associated with RA [7].

Over recent years there have been fundamental changes in the approach to treatment of RA with the availability of newer therapies and a move towards early and more aggressive treatment [8]. A recent meta-analysis including data from 70 trials, demonstrates that aggressive treatment with combination DMARDs is able to reduce structural joint damage [9]. DMARDs have a critical role in the management of RA and are central to both European recommendations [8] and UK guidance [10]. Issued in February 2009, NICE clinical guidelines for the treatment of RA recommend a combination of DMARDs (including methotrexate and at least one other DMARD, plus short-term glucocorticoids) as first-line treatment ideally within 3 months of symptom onset for people with recently diagnosed active RA [10].

Much information regarding the use of DMARDs is from published experience within the tertiary care setting however it is unclear how well this reflects routine practice in secondary and primary care settings across the UK. Despite the demonstrated efficacy of DMARDs, data from over 34,000 primary care records collected between 1987 and 2002 indicate that only half of patients diagnosed with RA receive DMARD therapy [12]. The UK General Practice Research Database (GPRD) is an electronic database of primary care medical records. GPRD contains data on over 8% of the population and has data on over 11 million individuals (cumulative) with over 5 million currently active [12, 13]. The GPRD has been used in several studies and the validity of an RA diagnosis in GPRD appears to be high for patients with specific characteristics [13]. The objectives of this study were to provide an updated view of current DMARD prescribing in RA with reference to best practice, to describe both temporal and regional trends in DMARD therapy for RA throughout the UK over a 15-year period, and to assess whether the latest knowledge on how RA should be treated has been translated into actual clinical practice.

## Methods

### *Data source*

1 We obtained data for this study from the GPRD which collates the computerized medical records of  
2 GPs. The data recorded in the GPRD include demographic information, prescription details, clinical  
3 events, preventive care provided, specialist referrals, hospital admissions, and major outcomes.  
4 The GPRD contains the complete anonymised patient medical records from GPs who use the  
5 system from In Practice Systems (a software package used for patient medical records) and who  
6 agree to adhere to "Recording Guidelines" that are subject to detailed quality control checks of  
7 data at both practice and individual patient level.  
8  
9  
10  
11  
12

### 13 *Study design and population*

14 We conducted a descriptive, cohort study in permanently registered patients aged 18 years and  
15 over with a recorded diagnosis of RA between 01/01/1995 and 31/03/2010. We identified our  
16 study population through screening of all patients in the GPRD (n=11,480,996); who had a clinical  
17 or referral record for RA (n=63,238); with a record on or after 01/01/1995 (n=45,057); where this  
18 record was on or after the start of follow up (latest of patient registration or practice up-to-standard  
19 [UTS] date) (n=36,567); who were aged at least 18 at this date (n=36,035); and who had at least  
20 one day of follow-up (n=35,911). We used the same Read codes as in the previous RA validation  
21 study [13].  
22  
23  
24  
25  
26  
27  
28

29 The period of follow-up was from the date of first RA record up (i.e. index date) to the date of  
30 censoring (i.e. latest GPRD data collection, patient's transfer out of the practice, or patient's death,  
31 whichever date came first). The study population included patients with a record of RA prior to start  
32 of GPRD data collection (i.e., prevalent cases) and also RA patients with a first-ever record of RA  
33 at least 1 year after start of GPRD data collection (i.e. incident cases). Each RA patient was  
34 matched by age, gender and practice to three patients without a record of inflammatory disease  
35 (listed in Appendix 1).  
36  
37  
38  
39  
40

### 41 *Analysis of utilisation characteristics*

42 We conducted an analysis to describe the exposure characteristics of incident RA patients from  
43 index date. We measured the prevalence of use of different medications stratified by age at  
44 diagnosis (at date of first-ever record of RA), age at time of measurement, sex, calendar year and  
45 strategic health authority. We determined the prevalence of medication use by evaluating GP  
46 prescribing in the 6 months before the index date of the following DMARDS: methotrexate;  
47 sulfasalazine; hydroxychloroquine; gold (sodium aurothiomalate); auranofin; penicillamine;  
48 leflunomide; azathioprine; ciclosporin; and cyclophosphamide. Of note, GPRD captures information  
49 on all prescriptions issued both acute and repeat, along with dosage instructions.  
50  
51  
52  
53  
54  
55  
56

## 57 **Results**

### 58 *Baseline characteristics*

1 The full cohort included both incident and prevalent RA cases and comprised a total of 35,911  
2 patients. RA patients and matched controls were well balanced in terms of age, gender and  
3 socioeconomic status. However, there was a higher prevalence of smokers and a lower prevalence  
4 of drinkers among RA patients. Of the 35,911 patients in the full RA cohort, a subgroup of 15,259  
5 patients (42%) had incident RA. With regard to treatment, there was a 10-fold increase in  
6 prescribing of prednisolone for incident RA patients versus matched controls and a 9-fold increase  
7 in prescribing of non-steroidal anti-inflammatory drugs (NSAIDs) in the 6 months prior to diagnosis.  
8  
9  
10  
11  
12

### 13 *Prescription practice by region and time period for incident patients*

#### 14 *General trends*

15 The data was analysed to assess the proportion of incident RA patients prescribed either DMARD,  
16 methotrexate or combination DMARD within 3, 6 or 12 months of diagnosis according to  
17 geographic region and according to time period (1995–1999, 2000–2005, and 2006–April 2010)  
18 (Appendix 2). In general, the data indicate that across all regions and within each time period, the  
19 proportion of patients prescribed DMARDs including methotrexate increased between 3 months  
20 and 12 months. However, increases in the proportion of patients prescribed combination DMARDs  
21 were less marked with either no or little increase between 3–6 and 6–12 months but a modest  
22 overall increase between 3 and 12 months.  
23  
24  
25  
26  
27  
28  
29

#### 30 *Temporal change in medication prescribing*

31 In order to provide a snapshot of change in DMARD usage over time, the data was analysed to  
32 assess the proportion of patients prescribed either any DMARD, methotrexate or any combination  
33 of DMARDs within 12 months according to time period (1995–1999, 2000–2005, and 2006–April  
34 2010) (Table 1). There was a substantial increase in 12-month prescribing of DMARD (from 36.9%  
35 to 60.1%), methotrexate (from 11.6% to 40.7%), and combination DMARD (from 0.9% to 9.1%)  
36 over the 15-year time period. Analysis of regional data demonstrated an increase in the proportion  
37 of patients prescribed DMARDs at 12 months across all regions during the 15-year time period  
38 (Figure 1). At baseline (1995–1999) between 19.29% (East Midlands) and 49.06% (Northern  
39 Ireland) of patients were prescribed DMARDs at 12 months; by 2006–April 2010 the rate of  
40 prescribing had increased from between 45.32% (London) to 73.6% (Scotland). A general trend for  
41 increased prescription of DMARDs/methotrexate between 3–12 months was also evident across all  
42 regions. Of note, combination DMARDs tended to be prescribed after 3 months with increasing  
43 prescription between 6 and 12 months and between 1995–April 2010 across all regions (Appendix  
44 2).  
45  
46  
47  
48  
49  
50  
51  
52  
53  
54

#### 55 *Regional variation*

56 Analysis of data focusing on prescribing of DMARDs at 12 months demonstrates substantial  
57 regional variation in DMARD prescribing regardless of time period (Figure 2). Regional variation in  
58  
59  
60



1 DMARD prescribing at 12 months ranged from 19.29–49.06% between 1995–1999; from 36.09–  
2 60.17% between 2000–2005; and from 45.32–73.6% between 2006–April 2010. The regional  
3 difference in the proportion of patients prescribed DMARD at 12 months ranged from 24–30%  
4 within each time period. Prescribing patterns of methotrexate and combination DMARDs also  
5 varied from region to region regardless of time period (Appendix 2).  
6  
7  
8  
9

#### 10 *Time from diagnosis to treatment*

11 The data for incident patients with UTS data of five years was analysed to evaluate time from  
12 diagnosis to treatment with either DMARD and/or methotrexate. For 5,513 patients prescribed a  
13 DMARD, the median time from diagnosis to treatment was 50 days (interquartile range [IQR] 0–  
14 1,826); for 3,754 patients prescribed methotrexate, the median time from diagnosis to treatment  
15 was 119 days (IQR 0–1,826); while for 1,310 patients prescribed combination DMARD the median  
16 time from diagnosis to treatment was 560 days (IQR 0–1,826).  
17  
18  
19  
20  
21  
22

#### 23 **Discussion**

24 We have demonstrated that between 1995 and 2010 there was a substantial increase in DMARD,  
25 methotrexate and combination DMARD prescribing across all regions. In this 15-year period, 12-  
26 month prescribing of DMARD almost doubled rising from 36.9% to 60.1%; 12-month prescribing of  
27 methotrexate quadrupled from 11.6% to 40.7%; and 12-month prescribing of combination DMARD  
28 showed a ten-fold increase from 0.9% to 9.0%. However, some 40% of patients were not receiving  
29 DMARD at 12 months despite national clinical guidelines recommending this therapy within 3  
30 months of diagnosis [10] indicating a relative under-treatment of RA. In addition, the marked  
31 regional variation in the prescription of DMARDs within the UK persists and has not decreased with  
32 time. To our knowledge, this is the first time that data on the use of DMARDs over this time period  
33 has been examined in a large RA population in the UK.  
34  
35  
36  
37  
38  
39  
40

#### 41 **Clinical implications**

42 Several studies indicate that appropriate and timely use of DMARDs and biologics for  
43 management of RA can improve outcomes such as mortality risk and HRQOL [16, 17, 18, 19].  
44 However previous studies indicate that many patients receive insufficient treatment [20] and that  
45 there is variation in practice in the management of RA [3]. Our current data confirm the significant  
46 regional variation both in the timing of DMARD or methotrexate therapy and in the proportion of  
47 patients diagnosed with RA receiving these therapies at specific time points. Based on the latest  
48 data from 2006–April 2010 for regions in England (i.e. excluding Wales, Scotland and Northern  
49 Ireland), the proportion of RA patients receiving DMARDs at 12 months between 2006–April 2010  
50 ranges from 45.32% (London) to 66.83% (South Central). In addition, the proportion of RA patients  
51 in England receiving methotrexate at 12 months in this latest time period ranges from 32.11%  
52 (North East) to 51.62% (South Central); at best two-thirds of RA patients in England are being  
53  
54  
55  
56  
57  
58  
59  
60



1 prescribed DMARDs and approximately one-half of RA patients in England are being prescribed  
2 methotrexate by 12 months (Appendix 2).  
3  
4

5  
6 The underlying reasons for this variation are not clear but could be due to several factors such as  
7 differences in RA health spend or differences in implementation and sharing of best practice. With  
8 the devolution of the NHS in 1999, differences in health services management and delivery exist  
9 between England, Scotland, Wales and Northern Ireland. Interestingly, our data indicate that  
10 Scotland and Northern Ireland have the highest proportion of RA patients prescribed DMARDs at  
11 12 months (73.6% and 70.14%, respectively) and Northern Ireland the highest proportion of  
12 patients prescribed methotrexate at 12 months (60.42%; 34.78% in Scotland). This may suggest  
13 that there are lessons to be learned from regions which demonstrate good practice, possibly  
14 through understanding the impact of different networks, interaction and communication and the  
15 impact of different health spend priorities. Of note, there is as yet no benchmark defining the  
16 proportion of RA patients who should be prescribed DMARDs. These drugs are not suitable for *all*  
17 RA patients for example those with contraindications and women trying to conceive. Therefore the  
18 'ideal' would be less than 100% of patients and possibly around 80% seems a realistic estimate of  
19 the proportion of RA patients eligible for DMARD therapy.  
20  
21  
22  
23  
24  
25  
26  
27  
28

29 Several reports emphasize the importance of early and appropriate intervention in RA to optimise  
30 patient outcomes [10, 21]. A meta-analysis assessing the long-term impact of early treatment on  
31 radiographic progression in RA which included 1,133 patients identified a critical period for the  
32 initiation of RA therapy, a 'therapeutic window of opportunity' early in the course of RA which was  
33 associated with durable benefit in radiographic progression for a period of up to 5 years. In this  
34 analysis, there was a 33% reduction in long-term progression rates in patients receiving early  
35 therapy for their disease compared with those treated later [22]. Importantly, suboptimal treatment  
36 can lead to joint damage necessitating surgery (with the associated resource implications), and to  
37 a higher mortality risk from cardiovascular disease, a risk which can be mitigated with appropriate  
38 and timely methotrexate treatment [7].  
39  
40  
41  
42  
43  
44  
45

46 In our study, median time from diagnosis to treatment with DMARD, methotrexate or combination  
47 DMARD was 50, 119, and 560 days, respectively. This compares with NICE clinical guideline  
48 recommendations for combination DMARD treatment (including methotrexate) to be used as first-  
49 line therapy within 3 months of the onset of persistent symptoms [10]. Our findings indicate that RA  
50 patients who do receive methotrexate have it prescribed a median 4 months after diagnosis. Prior  
51 to diagnosis many patients in our study were already receiving treatment or therapies that may  
52 ameliorate the symptoms of RA (Appendix 3): this may further delay treatment as RA symptoms  
53 are masked though damage continues and can impact outcomes. Given the likely delay between  
54 symptom onset and diagnosis, the time from symptom onset to methotrexate is probably greater  
55  
56  
57  
58  
59  
60

1 than 4 months. Furthermore it should be noted that during the most recent time period (2006–April  
2 2010) by 12 months at best only half of diagnosed RA patients were prescribed methotrexate  
3 (51.62%; South Central region).  
4  
5  
6

7 Effective treatments for RA are available [8, 23] however, the results from our study demonstrate  
8 that RA is often suboptimally treated and that regional variation in the management of RA persists  
9 after almost two years of guidance being available. Despite a recommendation for first-line  
10 treatment with combination DMARDs, fewer than 1 in 10 RA patients in the UK receive this  
11 therapy. Although there has been an encouraging increase in DMARD and methotrexate  
12 prescribing post-NICE recommendations, these appear to reflect a general upward trend rather  
13 than rapid implementation and uptake of NICE guidelines. Recently published data indicate that  
14 the challenge of RA guideline implementation is not restricted to the UK. Assessment of  
15 prescribing practices in a US cohort of RA patients before and after publication of American  
16 College of Rheumatology (ACR) treatment recommendations indicates that at best only around  
17 50% of RA patients with active disease receive care consistent with the current recommendations  
18 [25].  
19  
20  
21  
22  
23  
24  
25  
26

27 The longer term impact of our findings should be considered including the cost of surgical  
28 intervention when RA is suboptimally controlled resulting in joint damage. Policymakers should be  
29 aware of the persistence of variation and assess how best to minimise inequalities in RA care. A  
30 future challenge is how best to disseminate and embed new standards of care into routine clinical  
31 practice especially for chronic diseases such as RA where treatment is undertaken by a range of  
32 healthcare professionals in different settings. This is likely to be ever more relevant as the care of  
33 patients with chronic disease increasingly is being transferred into the community setting.  
34 We conclude that there is a need to optimise dissemination and implementation of high-quality  
35 clinical guidelines, that systems and processes for monitoring implementation should be  
36 developed, and that relevant indicators should be incorporated to ensure that guidelines are  
37 followed. Furthermore, accurate information on current prescribing in RA is vital to inform the  
38 development of the planned NICE Quality Standard for RA.  
39  
40  
41  
42  
43  
44  
45  
46

### 47 **Strengths and weaknesses**

48 One of the strengths of our study was the size of the study population with 15,259 patients with  
49 incident RA and of the long-term follow-up of these patients (mean 5.5 years but up to 15.3 years  
50 for some patients). Another is the generalisability of the GPRD database from which our data was  
51 obtained. The GPRD is representative of patients and practices throughout the UK [14], and  
52 encompasses patients treated in primary, secondary and tertiary care. The regional variation  
53 observed in prescribing of DMARDs could be due to regional differences in the incidence of RA.  
54 However, data on age of diagnosis over the duration of the study (Appendix 3) together with data  
55  
56  
57  
58  
59  
60

1 (for 2009) on point prevalence and incidence rates for RA in the GPRD (Appendix 4) were as  
2 expected, indicating robustness of the data.  
3  
4

5  
6 The coding of the diagnosis of RA is a potential limitation. However, GPRD has been validated in  
7 previous studies [13] and again in this study by the observation of similar demographics for  
8 DMARD versus non-DMARD users. Furthermore, practices are monitored for the accuracy and  
9 completeness of data they submit to the GPRD data by running set queries on the data and as  
10 they are reimbursed by GPRD, penalties can be levied against practices that routinely fail to meet  
11 recording standards [14]. It is also unlikely that our results are compromised by healthcare seeking  
12 behaviour given the similar rates of prescribing of non-antirheumatic medication (statins, aspirin,  
13 antihypertensives and diabetic medications) in the full RA cohort versus matched controls  
14 (Appendix 3). There may be temporal and regional variation in when GPs start to prescribe  
15 DMARDs. In some areas the GP initiates the first DMARD prescription on the advice of the  
16 rheumatologist; in other areas the hospital rheumatologist may initiate prescribing for a period of  
17 time. However by 12 months it seems likely that most prescribing will be via the GP. This is  
18 supported by data from the IMS British Pharmaceutical Index (BPI) / IMS Hospital Pharmacy Index  
19 (HPA) which demonstrates that across all indications, over 90% of all DMARDs prescribing is  
20 carried out within primary care; for methotrexate, around 75–80% of all prescribing is carried out in  
21 the primary care setting [15].  
22  
23  
24  
25  
26  
27  
28  
29  
30  
31

### 32 **Conclusions**

33 In summary, there has been a substantial improvement in the treatment of RA across the UK over  
34 the 15-year period from 1995–2010 with increasing use of DMARDs which currently represent best  
35 clinical practice. Despite this improvement, RA remains under-treated according to clinical  
36 recommendations and guidelines in the UK [10] and elsewhere [24]. In addition regional variation  
37 in DMARD and methotrexate prescribing persists across the UK and publication of national clinical  
38 guidelines does not appear to have had a marked impact on standardising prescribing behaviour.  
39 Improvement in RA treatment is needed UK-wide: identification and assessment of models of RA  
40 treatment that demonstrate implementation of evidence-based best clinical practice would  
41 minimise variation, facilitate nationally a uniform approach to RA treatment, to both improve patient  
42 outcomes and optimise resource use.  
43  
44  
45  
46  
47  
48  
49  
50  
51  
52  
53  
54  
55  
56  
57  
58  
59  
60

1 **Acknowledgements** We thank Claire Housden and Kirsty Roberts (Roche Products Ltd) for  
2 procuring project funding and Ify Sargeant (ismedica Ltd) for medical writing support, funded by  
3 Roche Products Ltd.  
4

5 **Contributors:** CJE, NKA, TvS and JC made primary contributions to study design, data collection,  
6 data analysis, interpretation of results, and writing the manuscript. All authors contributed to the  
7 interpretation of results and critical revision of the manuscript and approved the final manuscript.  
8 All authors had full access to all of the data (including statistical reports and tables) in the study  
9 and can take responsibility for the integrity of the data and the accuracy of the data analysis. CJE  
10 is the guarantor.  
11

12 **Funding:** This work was supported by Roche-Chugai who funded data generation and analysis by  
13 GPRD. Funding sources had no influence on the study design, interpretation of results, or decision  
14 to submit the article.  
15

16 **Competing interests:** All authors have completed the Unified Competing Interest form at  
17 [www.icmje.org/coi\\_disclosure.pdf](http://www.icmje.org/coi_disclosure.pdf) (available on request from the corresponding author) and  
18 declare: financial support for the submitted work from Roche-Chugai; CJE has acted as speaker  
19 for and received research funding from Roche, UCB, Abbott, GSK and Pfizer; NKA has acted as  
20 speaker for and received research funding from Roche, Merck, Q-Med, NICOX, Flexion, Servier,  
21 GSK, Amgen and Lilly; GPRD (JC and TvS) has received funding from the MHRA, Wellcome  
22 Trust, Medical Research Council, NIHR Health Technology Assessment programme, Innovative  
23 Medicine Initiative, UK Department of Health, Technology Strategy Board, Seventh Framework  
24 Programme EU, various universities, contract research organisations and pharmaceutical  
25 companies. The department of Pharmacoepidemiology & Pharmacotherapy, Utrecht Institute for  
26 Pharmaceutical Sciences (TvS) has received unrestricted funding for pharmacoepidemiological  
27 research from GlaxoSmithKline, Novo Nordisk, the private-public funded Top Institute Pharma  
28 ([www.tipharma.nl](http://www.tipharma.nl), includes co-funding from universities, government, and industry), the Dutch  
29 Medicines Evaluation Board, and the Dutch Ministry of Health; no other relationships or activities  
30 that could appear to have influenced the submitted work.  
31

32 **Ethical approval:** Ethical approval was not required  
33

34 **Data sharing:** No additional data available.  
35  
36  
37  
38  
39  
40  
41  
42  
43  
44  
45  
46  
47  
48  
49  
50  
51  
52  
53  
54  
55  
56  
57  
58  
59  
60

## References

1. Cooney JK, Law RJ, Matschke V, et al. Benefits of exercise in rheumatoid arthritis. *J Aging Res* 2011. Article ID 681640, 14 pages, 2011. doi:10.4061/2011/681640.
2. Wong JB, Ramey DR, Singh G. Long-term morbidity, mortality, and economics of rheumatoid arthritis. *Arthritis Rheum* 2001;44:2746–9.
3. NAO 2009. National Audit Offices. Services for people with rheumatoid arthritis. The Stationary Office. Available at: [www.nao.org.uk/publications/0809/services\\_for\\_people\\_with\\_rheum.aspx](http://www.nao.org.uk/publications/0809/services_for_people_with_rheum.aspx) (accessed April 2012)
4. Ovayolu N, Ovayolu O, Karadag G. Health-related quality of life in ankylosing spondylitis, fibromyalgia syndrome, and rheumatoid arthritis: a comparison with a selected sample of healthy individuals. *Clin Rheumatol* 2011;30:655–64.
5. Fleischmann R. Don't forget traditional DMARDs. Old friends are still useful. *Rheumatology* 2011;50:429–430.
6. Choy EH, Smith CM, Farewell V, et al. Factorial randomised controlled trial of glucocorticoids and combination disease modifying drugs in early rheumatoid arthritis. *Ann Rheum Dis* 2008;67:656–63.
7. Westlake SL, Colebatch AN, Baird J, et al. The effect of methotrexate on cardiovascular disease in patients with rheumatoid arthritis: a systematic literature review. *Rheumatology* 2010;49:295–307.
8. Smolen JS, Landewé R, Breedveld FC, et al. EULAR recommendations for the management of rheumatoid arthritis with synthetic and biological disease-modifying antirheumatic drugs. *Ann Rheum Dis* 2010;69:964–75.
9. Graudal N, Jürgens G. Similar effects of disease-modifying antirheumatic drugs, glucocorticoids, and biologic agents on radiographic progression in rheumatoid arthritis: meta-analysis of 70 randomized placebo-controlled or drug-controlled studies, including 112 comparisons. *Arthritis Rheum* 2010;62:2852–63.
10. NICE clinical guideline 79 – Rheumatoid arthritis. Available at: [www.nice.org.uk/nicemedia/pdf/CG79NICEGuideline.pdf](http://www.nice.org.uk/nicemedia/pdf/CG79NICEGuideline.pdf) (accessed April 2012)
11. Visser K, van der Heijde D. Optimal dosage and route of administration of methotrexate in rheumatoid arthritis: a systematic review of the literature. *Ann Rheum Dis* 2009;68:1094–1099.
12. Edwards CJ, Arden NK, Fisher D, et al. The changing use of disease-modifying anti-rheumatic drugs in individuals with rheumatoid arthritis from the United Kingdom General Practice Research Database. *Rheumatology* 2005;44:1394–1398.
13. Thomas SL, Edwards CJ, Smeeth L, et al. How Accurate Are Diagnoses for Rheumatoid Arthritis and Juvenile Idiopathic Arthritis in the General Practice Research Database? *Arthritis Rheum* 2008;59:1314–21.
14. Lawrenson R, Williams T, Farmer R. Clinical information for research; the use of general practice databases. *J Public Health Med* 1999;21:299–304.
15. IMS 2011. Usage of DMARDs (all indications) in Primary and Secondary Care. Source: IMS British Pharmaceutical Index (BPI) / IMS Hospital Pharmacy Index (HPA) 2011.
16. van Nies JA, de Jong Z, van der Helm-van Mil AH, et al. Improved treatment strategies reduce the increased mortality risk in early RA patients. *Rheumatology* 2010;49:2210–6.
17. Rigby W, Ferraccioli G, Greenwald M, et al. Effect of rituximab on physical function and quality of life in patients with rheumatoid arthritis previously untreated with methotrexate. *Arthritis Care Res (Hoboken)* 2011;63:711–20.

- 1 18. Strand V, Singh JA. Newer biological agents in rheumatoid arthritis: impact on health-  
2 related quality of life and productivity. *Drugs*. 2010;70:121–45.
- 3 19. Russell AS, Wallenstein GV, Li T, et al. Abatacept improves both the physical and mental  
4 health of patients with rheumatoid arthritis who have inadequate response to methotrexate  
5 treatment. *Ann Rheum Dis* 2007;66:189–94.
- 6 20. Pollard L, Choy EH, Scott DL. The consequences of rheumatoid arthritis: quality of life  
7 measures in the individual patient. *Clin Exp Rheumatol*. 2005;23(5 Suppl 39):S43–52.
- 8 21. Lard LR, Visser H, Speyer I, et al. Early versus delayed treatment in patients with recent-  
9 onset rheumatoid arthritis: comparison of two cohorts who received different treatment  
10 strategies. *Am J Med* 2001;111:446–51.
- 11 22. Finckh A, Liang MH, van Herckenrode CM, et al. Long-term impact of early treatment on  
12 radiographic progression in rheumatoid arthritis: A meta-analysis. *Arthritis Rheum*  
13 2006;55:864–72.
- 14 23. Singh JA, Christensen R, Wells GA, et al. Biologics for rheumatoid arthritis: an overview of  
15 Cochrane reviews. *Sao Paulo Med J* 2010;128:309–10.
- 16 24. ACR; American College of Rheumatology Subcommittee on Rheumatoid Arthritis  
17 Guidelines. Guidelines for the management of rheumatoid arthritis: 2002 update. *Arthritis*  
18 *Rheum* 2002;46:328–46.
- 19 25. Harrold LR, Harrington JT, Curtis JR, et al. Prescribing practices in a US cohort of  
20 rheumatoid arthritis patients before and after publication of the American College of  
21 Rheumatology treatment recommendations. *Arthritis Rheum* 2012;64:630-8.
- 22
- 23
- 24
- 25
- 26
- 27
- 28
- 29
- 30
- 31
- 32
- 33
- 34
- 35
- 36
- 37
- 38
- 39
- 40
- 41
- 42
- 43
- 44
- 45
- 46
- 47
- 48
- 49
- 50
- 51
- 52
- 53
- 54
- 55
- 56
- 57
- 58
- 59
- 60

**Table 1:** Proportion of patients prescribed DMARDs within 12 months vs. number diagnosed according to time period across all regions.

| Time period     | No. of patients diagnosed with RA | No. of patients prescribed DMARD (%) | No. of patients prescribed methotrexate (%) | No. of patients prescribed DMARD combination (%) |
|-----------------|-----------------------------------|--------------------------------------|---------------------------------------------|--------------------------------------------------|
| 1995–1999       | 1620                              | 36.9%                                | 11.6%                                       | 0.9%                                             |
| 2000–2005       | 3411                              | 46.1%                                | 23.6%                                       | 3.5%                                             |
| 2006–April 2010 | 3218                              | 60.1%                                | 40.7%                                       | 9.0%                                             |

For peer review only



1  
2  
3  
4  
5  
6  
7  
8  
9  
10  
11  
12  
13  
14  
15  
16  
17  
18  
19  
20  
21  
22  
23  
24  
25  
26  
27  
28  
29  
30  
31  
32  
33  
34  
35  
36  
37  
38  
39  
40  
41  
42  
43  
44  
45  
46  
47  
48  
49  
50  
51  
52  
53  
54  
55  
56  
57  
58  
59  
60

**DMARD at  
12 months 1995-1999**

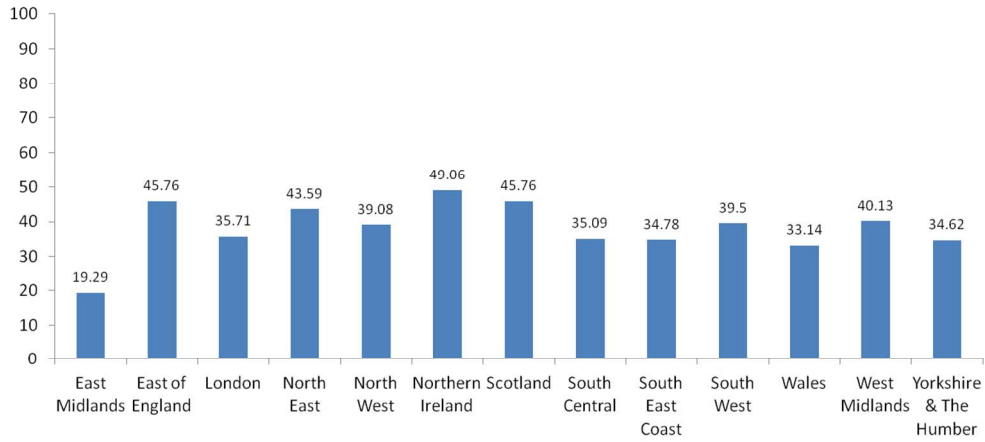

Figure 1a: Percentage of patients prescribed DMARDs at 12 months by region for the time period 1995-1999.  
228x125mm (150 x 150 DPI)

review only

1  
2  
3  
4  
5  
6  
7  
8  
9  
10  
11  
12  
13  
14  
15  
16  
17  
18  
19  
20  
21  
22  
23  
24  
25  
26  
27  
28  
29  
30  
31  
32  
33  
34  
35  
36  
37  
38  
39  
40  
41  
42  
43  
44  
45  
46  
47  
48  
49  
50  
51  
52  
53  
54  
55  
56  
57  
58  
59  
60

**DMARD at  
12 months 2000-2005**

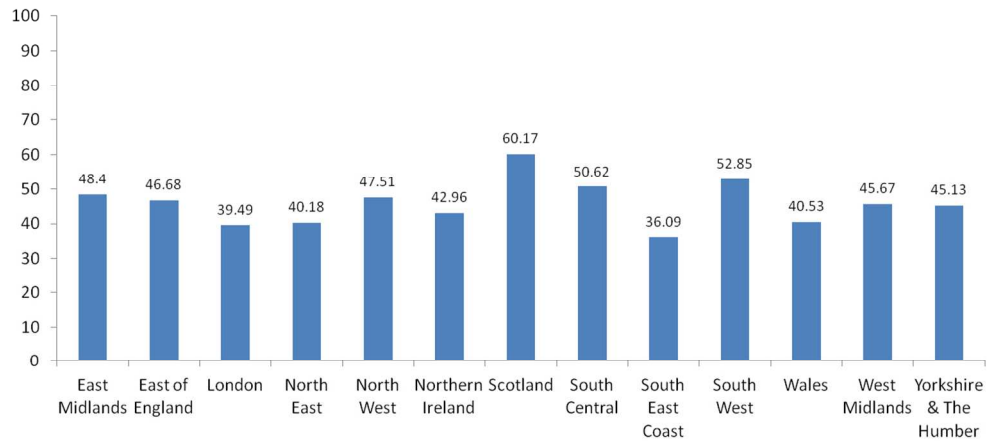

Figure 1b: Percentage of patients prescribed DMARDs at 12 months by region for the time period 2000-2005.  
228x125mm (150 x 150 DPI)

review only

1  
2  
3  
4  
5  
6  
7  
8  
9  
10  
11  
12  
13  
14  
15  
16  
17  
18  
19  
20  
21  
22  
23  
24  
25  
26  
27  
28  
29  
30  
31  
32  
33  
34  
35  
36  
37  
38  
39  
40  
41  
42  
43  
44  
45  
46  
47  
48  
49  
50  
51  
52  
53  
54  
55  
56  
57  
58  
59  
60

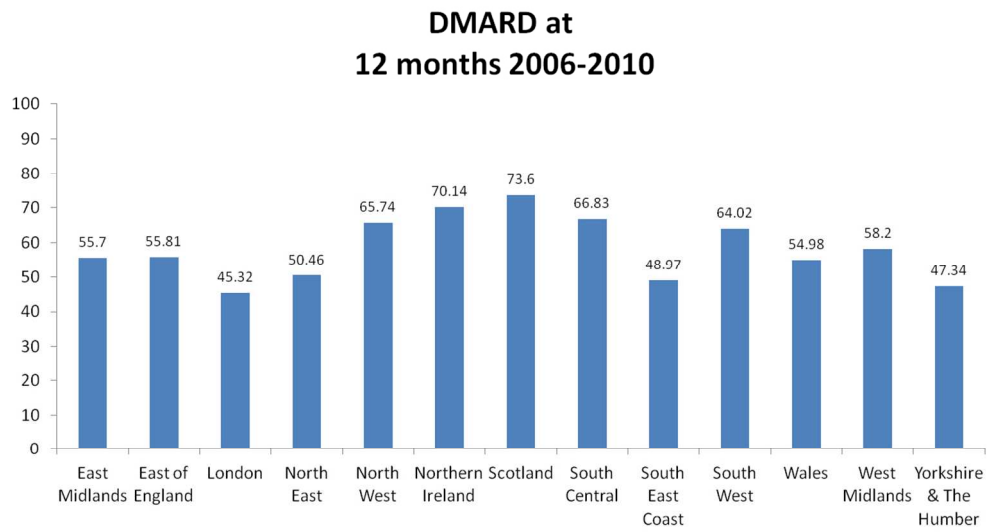

Figure 1c: Percentage of patients prescribed DMARDs at 12 months by region for the time period 2006–2010.  
228x125mm (150 x 150 DPI)

review only

1  
2  
3 *Appendix 1*

4 Each RA patient was matched by age, gender and practice to three patients without a record  
5 of inflammatory disease such as RA, juvenile arthritis, ankylosing spondylitis, enteropathic  
6 arthritis, reactive arthritis, inflammatory arthritis [seronegative], systemic lupus  
7 erythematosus [SLE], Sjogren's syndrome, mixed connective tissue disease [MCTD],  
8 polymyositis/dermatomyositis, scleroderma, polymyalgia rheumatica, giant cell arteritis,  
9 vasculitis [Wegeners], microscopic polyangiitis [MPA], Churg-strauss syndrome, polyarteritis  
10 nodosa [PAN], Takayasu arteritis, inflammatory bowel disease, sarcoidosis and psoriasis.  
11  
12  
13  
14  
15  
16  
17  
18  
19  
20  
21  
22  
23  
24  
25  
26  
27  
28  
29  
30  
31  
32  
33  
34  
35  
36  
37  
38  
39  
40  
41  
42  
43  
44  
45  
46  
47  
48  
49  
50  
51  
52  
53  
54  
55  
56  
57  
58  
59  
60

## Appendix 2: Medications usage by region and by time period

| Region          | Time period     | No. of patients diagnosed | No. of patients prescribed DMARD at 3 months (%) | No. of patients prescribed DMARD at 6 months (%) | No. of patients prescribed DMARD at 12 months (%) | No. of patients prescribed methotrexate at 3 months (%) | No. of patients prescribed methotrexate at 6 months (%) | No. of patients prescribed methotrexate at 12 months (%) | No. of patients prescribed combination DMARDs at 3 months (%) | No. of patients prescribed combination DMARDs at 6 months (%) | No. of patients prescribed combination DMARDs at 12 months (%) |
|-----------------|-----------------|---------------------------|--------------------------------------------------|--------------------------------------------------|---------------------------------------------------|---------------------------------------------------------|---------------------------------------------------------|----------------------------------------------------------|---------------------------------------------------------------|---------------------------------------------------------------|----------------------------------------------------------------|
| East Midlands   | 1995_1999       | 197                       | 22 (11.17%)                                      | 31 (15.74%)                                      | 38 (19.29%)                                       | 1 (0.51%)                                               | 2 (1.02%)                                               | 7 (3.55%)                                                | . (%)                                                         | . (%)                                                         | . (%)                                                          |
|                 | 2000_2005       | 219                       | 57 (26.03%)                                      | 84 (38.36%)                                      | 106 (48.40%)                                      | 20 (9.13%)                                              | 44 (20.09%)                                             | 58 (26.48%)                                              | . (%)                                                         | . (%)                                                         | 4 (1.83%)                                                      |
|                 | 2006_April 2010 | 149                       | 63 (42.28%)                                      | 75 (50.34%)                                      | 83 (55.70%)                                       | 27 (18.12%)                                             | 38 (25.50%)                                             | 49 (32.89%)                                              | . (%)                                                         | 4 (2.68%)                                                     | 7 (4.70%)                                                      |
| East of England | 1995_1999       | 236                       | 68 (28.81%)                                      | 92 (38.98%)                                      | 108 (45.76%)                                      | 18 (7.63%)                                              | 22 (9.32%)                                              | 31 (13.14%)                                              | . (%)                                                         | . (%)                                                         | 2 (0.85%)                                                      |
|                 | 2000_2005       | 512                       | 157 (30.66%)                                     | 204 (39.84%)                                     | 239 (46.68%)                                      | 64 (12.50%)                                             | 85 (16.60%)                                             | 113 (22.07%)                                             | 2 (0.39%)                                                     | 2 (0.39%)                                                     | 16 (3.13%)                                                     |
|                 | 2006_April 2010 | 353                       | 143 (40.51%)                                     | 178 (50.42%)                                     | 197 (55.81%)                                      | 86 (24.36%)                                             | 111 (31.44%)                                            | 129 (36.54%)                                             | 13 (3.68%)                                                    | 16 (4.53%)                                                    | 23 (6.52%)                                                     |
| London          | 1995_1999       | 154                       | 33 (21.43%)                                      | 44 (28.57%)                                      | 55 (35.71%)                                       | 11 (7.14%)                                              | 14 (9.09%)                                              | 18 (11.69%)                                              | 1 (0.65%)                                                     | 1 (0.65%)                                                     | 1 (0.65%)                                                      |
|                 | 2000_2005       | 314                       | 80 (25.48%)                                      | 102 (32.48%)                                     | 124 (39.49%)                                      | 43 (13.69%)                                             | 60 (19.11%)                                             | 76 (24.20%)                                              | 1 (0.32%)                                                     | 3 (0.96%)                                                     | 7 (2.23%)                                                      |
|                 | 2006_April 2010 | 331                       | 91 (27.49%)                                      | 123 (37.16%)                                     | 150 (45.32%)                                      | 65 (19.64%)                                             | 91 (27.49%)                                             | 116 (35.05%)                                             | 9 (2.72%)                                                     | 15 (4.53%)                                                    | 26 (7.85%)                                                     |
| North East      | 1995_1999       | 39                        | 9 (23.08%)                                       | 12 (30.77%)                                      | 17 (43.59%)                                       | 1 (2.56%)                                               | 2 (5.13%)                                               | 5 (12.82%)                                               | . (%)                                                         | . (%)                                                         | . (%)                                                          |
|                 | 2000_2005       | 112                       | 28 (25.00%)                                      | 41 (36.61%)                                      | 45 (40.18%)                                       | 6 (5.36%)                                               | 13 (11.61%)                                             | 18 (16.07%)                                              | . (%)                                                         | . (%)                                                         | 1 (0.89%)                                                      |
|                 | 2006_April 2010 | 109                       | 30 (27.52%)                                      | 43 (39.45%)                                      | 55 (50.46%)                                       | 17 (15.60%)                                             | 25 (22.94%)                                             | 35 (32.11%)                                              | 1 (0.92%)                                                     | 1 (0.92%)                                                     | 7 (6.42%)                                                      |

| Region           | Time period     | No. of patients diagnosed | No. of patients prescribed DMARD at 3 months (%) | No. of patients prescribed DMARD at 6 months (%) | No. of patients prescribed DMARD at 12 months (%) | No. of patients prescribed methotrexate at 3 months (%) | No. of patients prescribed methotrexate at 6 months (%) | No. of patients prescribed methotrexate at 12 months (%) | No. of patients prescribed combination DMARDs at 3 months (%) | No. of patients prescribed combination DMARDs at 6 months (%) | No. of patients prescribed combination DMARDs at 12 months (%) |
|------------------|-----------------|---------------------------|--------------------------------------------------|--------------------------------------------------|---------------------------------------------------|---------------------------------------------------------|---------------------------------------------------------|----------------------------------------------------------|---------------------------------------------------------------|---------------------------------------------------------------|----------------------------------------------------------------|
| North West       | 1995_1999       | 284                       | 70 (24.65%)                                      | 96 (33.80%)                                      | 111 (39.08%)                                      | 21 (7.39%)                                              | 28 (9.86%)                                              | 34 (11.97%)                                              | . (%)                                                         | . (%)                                                         | 1 (0.35%)                                                      |
|                  | 2000_2005       | 583                       | 215 (36.88%)                                     | 253 (43.40%)                                     | 277 (47.51%)                                      | 85 (14.58%)                                             | 111 (19.04%)                                            | 135 (23.16%)                                             | 8 (1.37%)                                                     | 11 (1.89%)                                                    | 23 (3.95%)                                                     |
|                  | 2006_April 2010 | 470                       | 247 (52.55%)                                     | 286 (60.85%)                                     | 309 (65.74%)                                      | 151 (32.13%)                                            | 178 (37.87%)                                            | 201 (42.77%)                                             | 28 (5.96%)                                                    | 44 (9.36%)                                                    | 60 (12.77%)                                                    |
| Northern Ireland | 1995_1999       | 53                        | 22 (41.51%)                                      | 24 (45.28%)                                      | 26 (49.06%)                                       | 4 (7.55%)                                               | 5 (9.43%)                                               | 6 (11.32%)                                               | 1 (1.89%)                                                     | 2 (3.77%)                                                     | 4 (7.55%)                                                      |
|                  | 2000_2005       | 135                       | 42 (31.11%)                                      | 53 (39.26%)                                      | 58 (42.96%)                                       | 21 (15.56%)                                             | 28 (20.74%)                                             | 38 (28.15%)                                              | 1 (0.74%)                                                     | 2 (1.48%)                                                     | 5 (3.70%)                                                      |
|                  | 2006_April 2010 | 144                       | 84 (58.33%)                                      | 97 (67.36%)                                      | 101 (70.14%)                                      | 69 (47.92%)                                             | 80 (55.56%)                                             | 87 (60.42%)                                              | 6 (4.17%)                                                     | 6 (4.17%)                                                     | 9 (6.25%)                                                      |
| Scotland         | 1995_1999       | 59                        | 22 (37.29%)                                      | 25 (42.37%)                                      | 27 (45.76%)                                       | 2 (3.39%)                                               | 4 (6.78%)                                               | 5 (8.47%)                                                | . (%)                                                         | . (%)                                                         | . (%)                                                          |
|                  | 2000_2005       | 231                       | 101 (43.72%)                                     | 126 (54.55%)                                     | 139 (60.17%)                                      | 16 (6.93%)                                              | 18 (7.79%)                                              | 30 (12.99%)                                              | 2 (0.87%)                                                     | 3 (1.30%)                                                     | 7 (3.03%)                                                      |
|                  | 2006_April 2010 | 322                       | 206 (63.98%)                                     | 228 (70.81%)                                     | 237 (73.60%)                                      | 75 (23.29%)                                             | 94 (29.19%)                                             | 112 (34.78%)                                             | 14 (4.35%)                                                    | 22 (6.83%)                                                    | 33 (10.25%)                                                    |
| South Central    | 1995_1999       | 114                       | 32 (28.07%)                                      | 37 (32.46%)                                      | 40 (35.09%)                                       | 12 (10.53%)                                             | 13 (11.40%)                                             | 18 (15.79%)                                              | . (%)                                                         | 1 (0.88%)                                                     | 1 (0.88%)                                                      |
|                  | 2000_2005       | 324                       | 123 (37.96%)                                     | 145 (44.75%)                                     | 164 (50.62%)                                      | 69 (21.30%)                                             | 90 (27.78%)                                             | 111 (34.26%)                                             | 11 (3.40%)                                                    | 18 (5.56%)                                                    | 35 (10.80%)                                                    |
|                  | 2006_April 2010 | 401                       | 215 (53.62%)                                     | 253 (63.09%)                                     | 268 (66.83%)                                      | 163 (40.65%)                                            | 192 (47.88%)                                            | 207 (51.62%)                                             | 33 (8.23%)                                                    | 52 (12.97%)                                                   | 67 (16.71%)                                                    |

| Region                 | Time period     | No. of patients diagnosed | No. of patients prescribed DMARD at 3 months (%) | No. of patients prescribed DMARD at 6 months (%) | No. of patients prescribed DMARD at 12 months (%) | No. of patients prescribed methotrexate at 3 months (%) | No. of patients prescribed methotrexate at 6 months (%) | No. of patients prescribed methotrexate at 12 months (%) | No. of patients prescribed combination DMARDs at 3 months (%) | No. of patients prescribed combination DMARDs at 6 months (%) | No. of patients prescribed combination DMARDs at 12 months (%) |
|------------------------|-----------------|---------------------------|--------------------------------------------------|--------------------------------------------------|---------------------------------------------------|---------------------------------------------------------|---------------------------------------------------------|----------------------------------------------------------|---------------------------------------------------------------|---------------------------------------------------------------|----------------------------------------------------------------|
| South East Coast       | 1995_1999       | 115                       | 20 (17.39%)                                      | 29 (25.22%)                                      | 40 (34.78%)                                       | 6 (5.22%)                                               | 10 (8.70%)                                              | 17 (14.78%)                                              | . (%)                                                         | . (%)                                                         | . (%)                                                          |
|                        | 2000_2005       | 327                       | 73 (22.32%)                                      | 96 (29.36%)                                      | 118 (36.09%)                                      | 48 (14.68%)                                             | 63 (19.27%)                                             | 83 (25.38%)                                              | 2 (0.61%)                                                     | 2 (0.61%)                                                     | 6 (1.83%)                                                      |
|                        | 2006_April 2010 | 290                       | 101 (34.83%)                                     | 130 (44.83%)                                     | 142 (48.97%)                                      | 72 (24.83%)                                             | 95 (32.76%)                                             | 104 (35.86%)                                             | 7 (2.41%)                                                     | 9 (3.10%)                                                     | 16 (5.52%)                                                     |
| South West             | 1995_1999       | 200                       | 51 (25.50%)                                      | 66 (33.00%)                                      | 79 (39.50%)                                       | 13 (6.50%)                                              | 20 (10.00%)                                             | 26 (13.00%)                                              | 1 (0.50%)                                                     | 1 (0.50%)                                                     | 5 (2.50%)                                                      |
|                        | 2000_2005       | 316                       | 133 (42.09%)                                     | 149 (47.15%)                                     | 167 (52.85%)                                      | 55 (17.41%)                                             | 63 (19.94%)                                             | 90 (28.48%)                                              | 2 (0.63%)                                                     | 2 (0.63%)                                                     | 14 (4.43%)                                                     |
|                        | 2006_April 2010 | 378                       | 180 (47.62%)                                     | 212 (56.08%)                                     | 242 (64.02%)                                      | 110 (29.10%)                                            | 139 (36.77%)                                            | 164 (43.39%)                                             | 11 (2.91%)                                                    | 21 (5.56%)                                                    | 30 (7.94%)                                                     |
| Wales                  | 1995_1999       | 169                       | 46 (27.22%)                                      | 55 (32.54%)                                      | 56 (33.14%)                                       | 5 (2.96%)                                               | 12 (7.10%)                                              | 17 (10.06%)                                              | . (%)                                                         | . (%)                                                         | 1 (0.59%)                                                      |
|                        | 2000_2005       | 338                       | 92 (27.22%)                                      | 112 (33.14%)                                     | 137 (40.53%)                                      | 28 (8.28%)                                              | 42 (12.43%)                                             | 53 (15.68%)                                              | . (%)                                                         | 1 (0.30%)                                                     | 2 (0.59%)                                                      |
|                        | 2006_April 2010 | 271                       | 112 (41.33%)                                     | 136 (50.18%)                                     | 149 (54.98%)                                      | 69 (25.46%)                                             | 88 (32.47%)                                             | 105 (38.75%)                                             | 2 (0.74%)                                                     | 4 (1.48%)                                                     | 13 (4.80%)                                                     |
| West Midlands          | 1995_1999       | 152                       | 40 (26.32%)                                      | 50 (32.89%)                                      | 61 (40.13%)                                       | 2 (1.32%)                                               | 5 (3.29%)                                               | 12 (7.89%)                                               | . (%)                                                         | 2 (1.32%)                                                     | 3 (1.97%)                                                      |
|                        | 2000_2005       | 497                       | 140 (28.17%)                                     | 201 (40.44%)                                     | 227 (45.67%)                                      | 43 (8.65%)                                              | 82 (16.50%)                                             | 102 (20.52%)                                             | . (%)                                                         | . (%)                                                         | 6 (1.21%)                                                      |
|                        | 2006_April 2010 | 366                       | 147 (40.16%)                                     | 185 (50.55%)                                     | 213 (58.20%)                                      | 89 (24.32%)                                             | 123 (33.61%)                                            | 146 (39.89%)                                             | 8 (2.19%)                                                     | 15 (4.10%)                                                    | 29 (7.92%)                                                     |
| Yorkshire & The Humber | 1995_1999       | 156                       | 33 (21.15%)                                      | 47 (30.13%)                                      | 54 (34.62%)                                       | 7 (4.49%)                                               | 12 (7.69%)                                              | 16 (10.26%)                                              | . (%)                                                         | . (%)                                                         | . (%)                                                          |
|                        | 2000_2005       | 277                       | 90 (32.49%)                                      | 107 (38.63%)                                     | 125 (45.13%)                                      | 37 (13.36%)                                             | 49 (17.69%)                                             | 67 (24.19%)                                              | 2 (0.72%)                                                     | 7 (2.53%)                                                     | 13 (4.69%)                                                     |
|                        | 2006_April 2010 | 169                       | 50 (29.59%)                                      | 65 (38.46%)                                      | 80 (47.34%)                                       | 33 (19.53%)                                             | 42 (24.85%)                                             | 58 (34.32%)                                              | 1 (0.59%)                                                     | 2 (1.18%)                                                     | 5 (2.96%)                                                      |



Appendix 3: Baseline characteristics for the incident RA patients (N=15,259)

| Characteristic                                        | Incident RA Patients<br>(N=15,259) | Matched Controls<br>(N=45,777) | Crude Odds Ratio<br>(95% CI) |
|-------------------------------------------------------|------------------------------------|--------------------------------|------------------------------|
| Age 18–29 years                                       | 418 (2.7%)                         | 1,254 (2.7%)                   | *                            |
| Age 30–39 years                                       | 1,139 (7.5%)                       | 3,417 (7.5%)                   | *                            |
| Age 40–49 years                                       | 2,035 (13.3%)                      | 6,105 (13.3%)                  | *                            |
| Age 50–59 years                                       | 3,387 (22.2%)                      | 10,161 (22.2%)                 | *                            |
| Age 60–69 years                                       | 3,513 (23.0%)                      | 10,539 (23.0%)                 | *                            |
| Age 70–79 years                                       | 3,136 (20.6%)                      | 9,408 (20.6%)                  | *                            |
| Age 80+ years                                         | 1,631 (10.7%)                      | 4,893 (10.7%)                  | *                            |
| Female gender (%)                                     | 10,565 (69.2%)                     | 31,695 (69.2%)                 | *                            |
| Year of diagnosis:                                    |                                    |                                |                              |
| 1995                                                  | 589 (3.9%)                         | 1,767 (3.9%)                   | *                            |
| 1996                                                  | 563 (3.7%)                         | 1,689 (3.7%)                   | *                            |
| 1997                                                  | 659 (4.3%)                         | 1,977 (4.3%)                   | *                            |
| 1998                                                  | 709 (4.6%)                         | 2,127 (4.6%)                   | *                            |
| 1999                                                  | 780 (5.1%)                         | 2,340 (5.1%)                   | *                            |
| 2000                                                  | 981 (6.4%)                         | 2,943 (6.4%)                   | *                            |
| 2001                                                  | 1,171 (7.7%)                       | 3,513 (7.7%)                   | *                            |
| 2002                                                  | 1,321 (8.7%)                       | 3,963 (8.7%)                   | *                            |
| 2003                                                  | 1,308 (8.6%)                       | 3,924 (8.6%)                   | *                            |
| 2004                                                  | 1,306 (8.6%)                       | 3,918 (8.6%)                   | *                            |
| 2005                                                  | 1,204 (7.9%)                       | 3,612 (7.9%)                   | *                            |
| 2006                                                  | 1,195 (7.8%)                       | 3,585 (7.8%)                   | *                            |
| 2007                                                  | 1,113 (7.3%)                       | 3,339 (7.3%)                   | *                            |
| 2008                                                  | 1,068 (7.0%)                       | 3,204 (7.0%)                   | *                            |
| 2009                                                  | 1,098 (7.2%)                       | 3,294 (7.2%)                   | *                            |
| 2010                                                  | 194 (1.3%)                         | 582 (1.3%)                     | *                            |
| Length of follow-up<br>(mean, years)                  | 5.2                                | 4.9                            | *                            |
| Smoking status <sup>1</sup>                           |                                    |                                |                              |
| Non smoker (%)                                        | 6,453 (42.3%)                      | 22,052 (48.2%)                 | Reference                    |
| Ex smoker (%)                                         | 3,747 (24.6%)                      | 9,230 (20.2%)                  | 1.45 (1.38 - 1.53)           |
| Smoker (%)                                            | 3,798 (24.9%)                      | 8,862 (19.4%)                  | 1.51 (1.43 - 1.58)           |
| History of a presenting symptom<br>(any) <sup>2</sup> | 10,091 (66.1%)                     | 15,015 (32.8%)                 | 4.99 (4.77 - 5.22)           |
| Joint pain (%)                                        | 9,275 (60.8%)                      | 13,118 (28.7%)                 | 4.73 (4.53 - 4.95)           |
| Swollen tender joints (%)                             | 1,587 (10.4%)                      | 1,543 (3.4%)                   | 3.53 (3.27 - 3.81)           |
| Morning stiffness (%)                                 | 701 (4.6%)                         | 465 (1.0%)                     | 4.77 (4.22 - 5.38)           |
| Previous prescribing of <sup>3</sup> :                |                                    |                                |                              |
| Steroid injections                                    | 704 (4.6%)                         | 316 (0.7%)                     | 7.30 (6.36 - 8.39)           |
| Prednisolone                                          | 2,732 (17.9%)                      | 990 (2.2%)                     | 10.03 (9.26 - 10.86)         |
| NSAIDs                                                | 10,698 (70.1%)                     | 10,305 (22.5%)                 | 8.95 (8.54 - 9.38)           |
| Analgesics/ opioids                                   | 1,801 (11.8%)                      | 1,275 (2.8%)                   | 4.84 (4.48 - 5.23)           |
| H2 antagonists and PPIs                               | 3,971 (26.0%)                      | 5,302 (11.6%)                  | 2.89 (2.75 - 3.03)           |
| Statins                                               | 1,847 (12.1%)                      | 5,348 (11.7%)                  | 1.05 (0.99 - 1.12)           |
| Aspirin                                               | 1,975 (12.9%)                      | 5,726 (12.5%)                  | 1.05 (0.99 - 1.11)           |
| Antihypertensives                                     | 4,581 (30.0%)                      | 12,573 (27.5%)                 | 1.16 (1.11 - 1.22)           |
| Diabetic medications                                  | 745 (4.9%)                         | 2,013 (4.4%)                   | 1.12 (1.03 - 1.22)           |

<sup>1</sup>Patients were matched on this variable.

<sup>2</sup>Smoking status not known in 1,261 (8.3%) and 5,633 (12.3%) of RA patients and matched controls, respectively.

<sup>3</sup>Medical records were analysed in the 5 years before index date.

<sup>3</sup>Prescriptions were analysed in the six months before index date.

Appendix 4: Incidence rates and point prevalence of RA in the GPRD 2009

| Region                 | Person years at risk (years) | Incident RA cases 2009 | Incidence rate per 100,000 persons (30/06/09) | GPRD Population 2009 | RA Cases 2009 | Point Prevalence per 100,000 persons (30/06/09) |
|------------------------|------------------------------|------------------------|-----------------------------------------------|----------------------|---------------|-------------------------------------------------|
| North East             | 85016.28                     | 34                     | 0.400                                         | 84831                | 491           | 5.788                                           |
| North West             | 534355.5                     | 146                    | 0.273                                         | 544693               | 2,930         | 5.379                                           |
| Yorkshire & The Humber | 123289.3                     | 34                     | 0.276                                         | 123910               | 770           | 6.214                                           |
| East Midlands          | 123771.1                     | 31                     | 0.250                                         | 130367               | 781           | 5.991                                           |
| West Midlands          | 363201.7                     | 111                    | 0.306                                         | 374308               | 2,074         | 5.541                                           |
| East of England        | 377678                       | 96                     | 0.254                                         | 389617               | 2,041         | 5.238                                           |
| South West             | 349426.3                     | 125                    | 0.358                                         | 354863               | 1,918         | 5.405                                           |
| South Central          | 474538                       | 106                    | 0.223                                         | 483299               | 2,250         | 4.656                                           |
| London                 | 514153.7                     | 113                    | 0.220                                         | 519717               | 1,877         | 3.612                                           |
| South East Coast       | 381501.3                     | 89                     | 0.233                                         | 387344               | 1,718         | 4.435                                           |
| Northern Ireland       | 121126.8                     | 35                     | 0.289                                         | 124176               | 725           | 5.838                                           |
| Scotland               | 339703.9                     | 97                     | 0.286                                         | 343287               | 1,676         | 4.882                                           |
| Wales                  | 331040.5                     | 81                     | 0.245                                         | 338133               | 1,787         | 5.285                                           |

STROBE Statement—Checklist of items that should be included in reports of *cohort studies*

|                              | Item No | Recommendation                                                                                                                                                                                                                                                                                                                                    |
|------------------------------|---------|---------------------------------------------------------------------------------------------------------------------------------------------------------------------------------------------------------------------------------------------------------------------------------------------------------------------------------------------------|
| <b>Title and abstract</b>    | 1       | (a) Indicate the study's design with a commonly used term in the title or the abstract<br><b>Done – page 1 and 2 of PDF proof</b>                                                                                                                                                                                                                 |
|                              |         | (b) Provide in the abstract an informative and balanced summary of what was done and what was found<br><b>Done – page 2 of PDF proof</b>                                                                                                                                                                                                          |
| <b>Introduction</b>          |         |                                                                                                                                                                                                                                                                                                                                                   |
| Background/rationale         | 2       | Explain the scientific background and rationale for the investigation being reported<br><b>Done – page 3 of PDF proof</b>                                                                                                                                                                                                                         |
| Objectives                   | 3       | State specific objectives, including any prespecified hypotheses<br><b>Done – page 3 of PDF proof</b>                                                                                                                                                                                                                                             |
| <b>Methods</b>               |         |                                                                                                                                                                                                                                                                                                                                                   |
| Study design                 | 4       | Present key elements of study design early in the paper<br><b>Done – page 4 of PDF proof</b>                                                                                                                                                                                                                                                      |
| Setting                      | 5       | Describe the setting, locations, and relevant dates, including periods of recruitment, exposure, follow-up, and data collection<br><b>Done – page 4 of PDF proof</b>                                                                                                                                                                              |
| Participants                 | 6       | (a) Give the eligibility criteria, and the sources and methods of selection of participants. Describe methods of follow-up<br><b>Done – page 4 of PDF proof</b>                                                                                                                                                                                   |
|                              |         | (b) For matched studies, give matching criteria and number of exposed and unexposed<br><b>Done – page 4 of PDF proof</b>                                                                                                                                                                                                                          |
| Variables                    | 7       | Clearly define all outcomes, exposures, predictors, potential confounders, and effect modifiers. Give diagnostic criteria, if applicable<br><b>Done – page 4 of PDF proof</b>                                                                                                                                                                     |
| Data sources/<br>measurement | 8*      | For each variable of interest, give sources of data and details of methods of assessment (measurement). Describe comparability of assessment methods if there is more than one group<br><b>Done – page 4 of PDF proof</b>                                                                                                                         |
| Bias                         | 9       | Describe any efforts to address potential sources of bias<br><b>Done – page 8, 23 and 24 of PDF</b>                                                                                                                                                                                                                                               |
| Study size                   | 10      | Explain how the study size was arrived at ( <b>Not applicable – this is a descriptive study without definition of any a-priori hypothesis</b> )                                                                                                                                                                                                   |
| Quantitative variables       | 11      | Explain how quantitative variables were handled in the analyses. If applicable, describe which groupings were chosen and why ( <b>Not applicable</b> )                                                                                                                                                                                            |
| Statistical methods          | 12      | (a) Describe all statistical methods, including those used to control for confounding<br>(b) Describe any methods used to examine subgroups and interactions<br>(c) Explain how missing data were addressed<br>(d) If applicable, explain how loss to follow-up was addressed<br>(e) Describe any sensitivity analyses<br><b>(Not applicable)</b> |
| <b>Results</b>               |         |                                                                                                                                                                                                                                                                                                                                                   |
| Participants                 | 13*     | (a) Report numbers of individuals at each stage of study—eg numbers potentially eligible, examined for eligibility, confirmed eligible, included in the study, completing follow-up, and analysed                                                                                                                                                 |

|                          |     |                                                                                                                                                                                                                     |
|--------------------------|-----|---------------------------------------------------------------------------------------------------------------------------------------------------------------------------------------------------------------------|
|                          |     | <b>Done – page 5 and 23 of PDF proof</b>                                                                                                                                                                            |
|                          |     | (b) Give reasons for non-participation at each stage ( <b>Not applicable</b> )                                                                                                                                      |
|                          |     | (c) Consider use of a flow diagram ( <b>Not applicable</b> )                                                                                                                                                        |
| Descriptive data         | 14* | (a) Give characteristics of study participants (eg demographic, clinical, social) and information on exposures and potential confounders<br><b>Done – page 5 and 23 of PDF proof</b>                                |
|                          |     | (b) Indicate number of participants with missing data for each variable of interest ( <b>Not applicable</b> )                                                                                                       |
|                          |     | (c) Summarise follow-up time (eg, average and total amount)<br><b>Done – page 4 of PDF proof</b>                                                                                                                    |
| Outcome data             | 15* | Report numbers of outcome events or summary measures over time<br><b>Done – page 5 and 6 of PDF proof</b>                                                                                                           |
| Main results             | 16  | (a) Give unadjusted estimates and, if applicable, confounder-adjusted estimates and their precision (eg, 95% confidence interval). Make clear which confounders were adjusted for and why they were included        |
|                          |     | (b) Report category boundaries when continuous variables were categorized                                                                                                                                           |
|                          |     | (c) If relevant, consider translating estimates of relative risk into absolute risk for a meaningful time period ( <b>Not applicable</b> )                                                                          |
| Other analyses           | 17  | Report other analyses done—eg analyses of subgroups and interactions, and sensitivity analyses ( <b>Not applicable</b> )                                                                                            |
| <b>Discussion</b>        |     |                                                                                                                                                                                                                     |
| Key results              | 18  | Summarise key results with reference to study objectives<br><b>Done – pages 6, 7 and 8 of PDF proof</b>                                                                                                             |
| Limitations              | 19  | Discuss limitations of the study, taking into account sources of potential bias or imprecision. Discuss both direction and magnitude of any potential bias<br><b>Done – pages 8 and 9 of PDF proof</b>              |
| Interpretation           | 20  | Give a cautious overall interpretation of results considering objectives, limitations, multiplicity of analyses, results from similar studies, and other relevant evidence<br><b>Done – pages 6–10 of PDF proof</b> |
| Generalisability         | 21  | Discuss the generalisability (external validity) of the study results<br><b>Done – pages 6–10 of PDF proof</b>                                                                                                      |
| <b>Other information</b> |     |                                                                                                                                                                                                                     |
| Funding                  | 22  | Give the source of funding and the role of the funders for the present study and, if applicable, for the original study on which the present article is based<br><b>Done – page 11 of PDF proof</b>                 |

\*Give information separately for exposed and unexposed groups.

**Note:** An Explanation and Elaboration article discusses each checklist item and gives methodological background and published examples of transparent reporting. The STROBE checklist is best used in conjunction with this article (freely available on the Web sites of PLoS Medicine at <http://www.plosmedicine.org/>, Annals of Internal Medicine at <http://www.annals.org/>, and Epidemiology at <http://www.epidem.com/>). Information on the STROBE Initiative is available at <http://www.strobe-statement.org>.

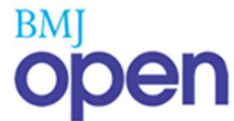

**Regional and temporal variation in the treatment of  
rheumatoid arthritis across the UK: a descriptive register-  
based cohort study**

|                                 |                                                                                                                                                                                                                                                                                                                                                                                                                               |
|---------------------------------|-------------------------------------------------------------------------------------------------------------------------------------------------------------------------------------------------------------------------------------------------------------------------------------------------------------------------------------------------------------------------------------------------------------------------------|
| Journal:                        | <i>BMJ Open</i>                                                                                                                                                                                                                                                                                                                                                                                                               |
| Manuscript ID:                  | bmjopen-2012-001603.R1                                                                                                                                                                                                                                                                                                                                                                                                        |
| Article Type:                   | Research                                                                                                                                                                                                                                                                                                                                                                                                                      |
| Date Submitted by the Author:   | 31-Aug-2012                                                                                                                                                                                                                                                                                                                                                                                                                   |
| Complete List of Authors:       | Edwards, Christopher; University Hospital Southampton NHS Foundation Trust, Rheumatology<br>Campbell, Jennifer; General Practice Research Database, Medicines and Healthcare products Regulatory Agency,<br>van Staa, Tjeerd; General Practice Research Database, Medicines and Healthcare products Regulatory Agency, ; Utrecht Institute for Pharmaceutical Sciences,<br>Arden, Nigel; Nuffield Department of Orthopaedics, |
| <b>Primary Subject Heading</b>: | Rheumatology                                                                                                                                                                                                                                                                                                                                                                                                                  |
| Secondary Subject Heading:      | General practice / Family practice                                                                                                                                                                                                                                                                                                                                                                                            |
| Keywords:                       | Rheumatology < INTERNAL MEDICINE, PRIMARY CARE, RHEUMATOLOGY                                                                                                                                                                                                                                                                                                                                                                  |
|                                 |                                                                                                                                                                                                                                                                                                                                                                                                                               |

SCHOLARONE™  
Manuscripts

1  
2  
3 **Regional and temporal variation in the treatment of rheumatoid arthritis across the UK: a**  
4 **descriptive register-based cohort study**  
5  
6  
7

8 **Authors**

9 Christopher J Edwards *consultant rheumatologist*<sup>1,2</sup>, Jennifer Campbell *research scientist*<sup>3</sup>, Tjeerd  
10 Van Staa *head of research*<sup>3,4</sup>, Nigel K Arden *professor of rheumatology*<sup>2,5</sup>.  
11  
12

13  
14 <sup>1</sup>Department of Rheumatology, University Hospital Southampton NHS Foundation Trust,  
15 Southampton, United Kingdom, SO16 6YD; <sup>2</sup>University of Southampton, Southampton, United  
16 Kingdom SO16 6YD; <sup>3</sup>General Practice Research Database, Medicines and Healthcare products  
17 Regulatory Agency, London, United Kingdom SW1W 9SZ; <sup>4</sup>Utrecht Institute for Pharmaceutical  
18 Sciences, Utrecht University, Utrecht, the Netherlands; <sup>5</sup>Nuffield Department of Orthopaedics,  
19 Rheumatology and Musculoskeletal Sciences, University of Oxford, United Kingdom OX3 7HE.  
20  
21  
22  
23

24 Correspondence to: Christopher J Edwards cedwards@soton.ac.uk  
25  
26  
27  
28  
29  
30  
31  
32  
33  
34  
35  
36  
37  
38  
39  
40  
41  
42  
43  
44  
45  
46  
47  
48  
49  
50  
51  
52  
53  
54  
55  
56  
57  
58  
59  
60

## Abstract

**Objectives:** To describe current DMARD prescription in rheumatoid arthritis (RA) with reference to best practice and to identify temporal and regional trends in the UK

**Design:** Descriptive, register-based cohort study

**Participants:** Permanently registered patients aged  $\geq 18$  years with a recorded diagnosis of RA between 01/01/1995 and 31/03/2010 and matched controls. Participants with RA were identified through screening of all patients in the General Practice Research Database (GPRD) with a clinical or referral record for RA and at least one day of follow-up.

**Setting:** 639 general practices in the UK supplying data to the GPRD

**Main outcome measures:** Medication prescribing between 3 and 12 months of RA diagnosis by region and time period (1995–1999, 2000–2005, and 2006–April 2010).

**Results:** Of the 35,911 patients in the full RA cohort, 15,259 patients (42%) had incident RA. Analysis of prescribing in incident RA patients demonstrated that between 1995 (baseline) and 2010 there was a substantial increase in DMARD, and specifically methotrexate, prescribing across all regions with a less marked increase in combination DMARD prescribing. Taking 12-month prescribing as a snapshot: DMARD prescribing was 19–49% at baseline increasing to 45–74% by 2006–April 2010; methotrexate prescribing was 4–16% at baseline increasing to 32–60%; combination DMARD prescribing was 0–8% at baseline increasing to 3–17%. However there was marked regional variation in the proportion of RA patients receiving DMARD regardless of time period.

**Conclusions:** There has been a substantial increase in prescribing of DMARDs for RA since 1995; however regional variation persists across the UK with relative under-treatment, according to established best practice. Improved implementation of evidence-based best clinical practice to facilitate removal of treatment variation is warranted. This may occur as a result of the implementation of published national guidance.

**Key words:** *Rheumatoid arthritis, DMARDs, General Practice Research Database, regional variation.*



## Article summary

### Article focus:

- Over recent years there have been fundamental changes in the approach to treatment of rheumatoid arthritis (RA) with a move towards early and more aggressive treatment
- Disease-modifying anti-rheumatic drugs (DMARDs) are effective in the treatment of RA and their early use is recommended in national and international clinical guidelines and recommendations.
- We describe both temporal and regional trends in DMARD therapy for RA throughout the UK over a 15-year period and reveal whether the latest knowledge on how RA should be treated has been translated into actual clinical practice

### Key messages:

- There has been a substantial increase in DMARD prescription for RA and an increase in the proportion of patients prescribed DMARD earlier in the course of their disease between 1995 and 2010
- However, RA remains relatively under-treated according to best practice and published national guidelines, and regional variation persists
- There is a need to optimise dissemination and implementation of high-quality clinical guidelines and to monitor implementation.

### Strengths and limitations of this study:

- One of the strengths of the study was the size of the study population with 15,259 patients with incident RA and of the long-term follow-up of these patients (mean 5.5 years but up to 15.3 years for some patients). Another is the generalisability of the General Practice Research Database (GPRD) database from which our data was obtained.
- The coding of the diagnosis of RA is a potential limitation; however, GPRD has been validated in previous studies and in this study by the observation of similar demographics for DMARD versus non-DMARD users.

## Introduction

Rheumatoid arthritis (RA) is a chronic, systemic, autoimmune disease, the most common form of chronic joint inflammation [1], and is associated with substantial long-term morbidity, mortality and health-care costs [2]. A recent report from the National Audit Office (NAO) estimates that around 580,000 people have RA in England and that 26,000 patients are diagnosed with RA each year [3]. RA can have a profound effect on patients through the physical manifestations of the disease, associated complications and impact on health-related quality of life (HRQOL) [4]. Disease-modifying anti-rheumatic drugs (DMARDs), used either as monotherapy or in combination, can control disease activity, reduce joint erosions [5], improve quality of life [6] and also reduce the cardiovascular morbidity associated with RA [7].

Over recent years there have been fundamental changes in the approach to treatment of RA with the availability of newer therapies and a move towards early and more aggressive treatment [8]. A recent meta-analysis including data from 70 trials, demonstrates that aggressive treatment with combination DMARDs is able to reduce structural joint damage [9]. DMARDs have a critical role in the management of RA and are central to both European recommendations [8] and UK guidance [10]. Issued in February 2009, NICE clinical guidelines for the treatment of RA recommend a combination of DMARDs (including methotrexate and at least one other DMARD, plus short-term glucocorticoids) as first-line treatment ideally within 3 months of symptom onset for people with recently diagnosed active RA [10]. The NICE guidance serves as an example of best practice although its publication in 2009 preclude us from determining accurately whether its recommendations have been taken up in this study.

Much information regarding the use of DMARDs is from published experience within the tertiary care setting however it is unclear how well this reflects routine practice in secondary and primary care settings across the UK. Despite the demonstrated efficacy of DMARDs, data from over 34,000 primary care records collected between 1987 and 2002 indicate that only half of patients diagnosed with RA receive DMARD therapy [11]. The UK General Practice Research Database (GPRD) is an electronic database of primary care medical records. GPRD contains data on over 8% of the population and has data on over 11 million individuals (cumulative) with over 5 million currently active [11, 12]. The GPRD has been used in several studies and the validity of an RA diagnosis in GPRD appears to be high for patients with specific characteristics when using the American College of Rheumatology (ACR) diagnostic criteria as the standard [12, 13]. All patients in the UK will be seen by a primary care physician or general practitioner in addition to any secondary care physician needed for care of a specific illness. Although individuals with RA were recruited to the GPRD by a general practitioner the validation studies described show that a rheumatologist in secondary care will also have seen the vast majority of individuals [12]. The objectives of this study were to provide an updated view of current DMARD prescribing in RA with

1 reference to best practice, to describe both temporal and regional trends in DMARD therapy for RA  
2 throughout the UK over a 15-year period, and to assess whether the latest knowledge on how RA  
3 should be treated has been translated into actual clinical practice.  
4  
5  
6

## 7 **Methods**

### 8 *Data source*

9 We obtained data for this study from the GPRD which collates the computerized medical records of  
10 GPs. The data recorded in the GPRD include demographic information, prescription details, clinical  
11 events, preventive care provided, specialist referrals, hospital admissions, and major outcomes.  
12 The GPRD contains the complete anonymised patient medical records from GPs who use the  
13 system from In Practice Systems (a software package used for patient medical records) and who  
14 agree to adhere to "Recording Guidelines" that are subject to detailed quality control checks of  
15 data at both practice and individual patient level.  
16  
17  
18  
19  
20  
21  
22

### 23 *Study design and population*

24 We conducted a descriptive, cohort study in permanently registered patients aged 18 years and  
25 over with a recorded diagnosis of RA between 01/01/1995 and 31/03/2010. We identified our  
26 study population through screening of all patients in the GPRD (n=11,480,996); who had a clinical  
27 or referral record for RA (n=63,238); with a record on or after 01/01/1995 (n=45,057); where this  
28 record was on or after the start of follow up (latest of patient registration or practice up-to-standard  
29 [UTS] date) (n=36,567); who were aged at least 18 at this date (n=36,035); and who had at least  
30 one day of follow-up (n=35,911). We used the same Read codes as in the previous RA validation  
31 study [12].  
32  
33  
34  
35  
36  
37

38 The period of follow-up was from the date of first RA record up (i.e. index date) to the date of  
39 censoring (i.e. latest GPRD data collection, patient's transfer out of the practice, or patient's death,  
40 whichever date came first). The study population included patients with a record of RA prior to start  
41 of GPRD data collection (i.e., prevalent cases) and also RA patients with a first-ever record of RA  
42 at least 1 year after start of GPRD data collection (i.e. incident cases). Each RA patient was  
43 matched by age, gender and practice to three patients without a record of inflammatory disease  
44 (listed in Appendix 1).  
45  
46  
47  
48  
49

### 50 *Analysis of utilisation characteristics*

51 We conducted an analysis to describe the exposure characteristics of incident RA patients from  
52 index date. We measured the prevalence of use of different medications stratified by age at  
53 diagnosis (at date of first-ever record of RA), age at time of measurement, sex, calendar year and  
54 strategic health authority. We determined the prevalence of medication use by evaluating GP  
55 prescribing in the 6 months before the index date of the following DMARDS: methotrexate;  
56  
57  
58  
59  
60

1 sulfasalazine; hydroxychloroquine; gold (sodium aurothiomalate); auranofin; penicillamine;  
2  
3 leflunomide; azathioprine; ciclosporin; and cyclophosphamide. Of note, GPRD captures information  
4  
5 on all prescriptions issued both acute and repeat, along with dosage instructions.  
6  
7

## 8 **Results**

### 9 *Baseline characteristics*

10 The full cohort included both incident and prevalent RA cases and comprised a total of 35,911  
11 patients. RA patients and matched controls were well balanced in terms of age, gender and  
12 socioeconomic status. However, there was a higher prevalence of smokers and a lower prevalence  
13 of drinkers among RA patients. Of the 35,911 patients in the full RA cohort, a subgroup of 15,259  
14 patients (42%) had incident RA. With regard to treatment, there was a 10-fold increase in  
15 prescribing of prednisolone for incident RA patients versus matched controls and a 9-fold increase  
16 in prescribing of non-steroidal anti-inflammatory drugs (NSAIDs) in the 6 months prior to diagnosis.  
17  
18  
19  
20  
21  
22

### 23 *Prescription practice by region and time period for incident patients*

#### 24 *General trends*

25 The data was analysed to assess the proportion of incident RA patients prescribed either DMARD,  
26 methotrexate or combination DMARD within 3, 6 or 12 months of diagnosis according to  
27 geographic region and according to time period (1995–1999, 2000–2005, and 2006–April 2010)  
28 (Appendix 2). In general, the data indicate that across all regions and within each time period, the  
29 proportion of patients prescribed DMARDs including methotrexate increased between 3 months  
30 and 12 months. However, increases in the proportion of patients prescribed combination DMARDs  
31 were less marked with either no or little increase between 3–6 and 6–12 months but a modest  
32 overall increase between 3 and 12 months.  
33  
34  
35  
36  
37  
38  
39

#### 40 *Temporal change in medication prescribing*

41 In order to provide a snapshot of change in DMARD usage over time, the data was analysed to  
42 assess the proportion of patients prescribed either any DMARD, methotrexate or any combination  
43 of DMARDs within 12 months according to time period (1995–1999, 2000–2005, and 2006–April  
44 2010) (Table 1). There was a substantial increase in 12-month prescribing of DMARD (from 36.9%  
45 to 60.1%), methotrexate (from 11.6% to 40.7%), and combination DMARD (from 0.9% to 9.1%)  
46 over the 15-year time period. Analysis of regional data demonstrated an increase in the proportion  
47 of patients prescribed DMARDs at 12 months across all regions during the 15-year time period  
48 (Figure 1). At baseline (1995–1999) between 19.29% (East Midlands) and 49.06% (Northern  
49 Ireland) of patients were prescribed DMARDs at 12 months; by 2006–April 2010 the rate of  
50 prescribing had increased from between 45.32% (London) to 73.6% (Scotland). A general trend for  
51 increased prescription of DMARDs/methotrexate between 3–12 months was also evident across all  
52 regions. Of note, combination DMARDs tended to be prescribed after 3 months with increasing  
53  
54  
55  
56  
57  
58  
59  
60

1 prescription between 6 and 12 months and between 1995–April 2010 across all regions (Appendix  
2 2).

### 6 *Regional variation*

7 Analysis of data focusing on prescribing of DMARDs at 12 months demonstrates substantial  
8 regional variation in DMARD prescribing regardless of time period (Figure 1). Regional variation in  
9 DMARD prescribing at 12 months ranged from 19.29–49.06% between 1995–1999; from 36.09–  
10 60.17% between 2000–2005; and from 45.32–73.6% between 2006–April 2010. The regional  
11 difference in the proportion of patients prescribed DMARD at 12 months ranged from 24–30%  
12 within each time period. Prescribing patterns of methotrexate and combination DMARDs also  
13 varied from region to region regardless of time period (Appendix 2).  
14  
15  
16  
17  
18  
19

### 20 *Time from diagnosis to treatment*

21 The data for incident patients with UTS data of five years was analysed to evaluate time from  
22 diagnosis to treatment with either DMARD and/or methotrexate. For 5,513 patients prescribed a  
23 DMARD, the median time from diagnosis to treatment was 50 days (interquartile range [IQR] 0–  
24 1,826); for 3,754 patients prescribed methotrexate, the median time from diagnosis to treatment  
25 was 119 days (IQR 0–1,826); while for 1,310 patients prescribed combination DMARD the median  
26 time from diagnosis to treatment was 560 days (IQR 0–1,826).  
27  
28  
29  
30  
31

## 32 **Discussion**

33 We have demonstrated that between 1995 and 2010 there was a substantial increase in DMARD,  
34 methotrexate and combination DMARD prescribing across all regions. In this 15-year period, 12-  
35 month prescribing of DMARD almost doubled rising from 36.9% to 60.1%; 12-month prescribing of  
36 methotrexate quadrupled from 11.6% to 40.7%; and 12-month prescribing of combination DMARD  
37 showed a ten-fold increase from 0.9% to 9.0%. However, some 40% of patients were not receiving  
38 DMARD at 12 months despite national clinical guidelines recommending this therapy within 3  
39 months of diagnosis [10] indicating a relative under-treatment of RA. In addition, the marked  
40 regional variation in the prescription of DMARDs within the UK persists and has not decreased with  
41 time. To our knowledge, this is the first time that data on the use of DMARDs over this time period  
42 has been examined in a large RA population in the UK.  
43  
44  
45  
46  
47  
48  
49

## 50 **Clinical implications**

51 Several studies indicate that appropriate and timely use of DMARDs and biologics for  
52 management of RA can improve outcomes such as mortality risk and HRQOL [14, 15, 16, 17].  
53 However previous studies indicate that many patients receive insufficient treatment [18] and that  
54 there is variation in practice in the management of RA [3]. Our current data confirm the significant  
55 regional variation both in the timing of DMARD or methotrexate therapy and in the proportion of  
56  
57  
58  
59  
60

1 patients diagnosed with RA receiving these therapies at specific time points. Based on the latest  
2 data from 2006–April 2010 for regions in England (i.e. excluding Wales, Scotland and Northern  
3 Ireland), the proportion of RA patients receiving DMARDs at 12 months between 2006–April 2010  
4 ranges from 45.32% (London) to 66.83% (South Central). In addition, the proportion of RA patients  
5 in England receiving methotrexate at 12 months in this latest time period ranges from 32.11%  
6 (North East) to 51.62% (South Central); at best two-thirds of RA patients in England are being  
7 prescribed DMARDs and approximately one-half of RA patients in England are being prescribed  
8 methotrexate by 12 months (Appendix 2).

14 The underlying reasons for this variation are not clear but could be due to several factors such as  
15 differences in RA health spend or differences in implementation and sharing of best practice. With  
16 the devolution of the NHS in 1999, differences in health services management and delivery exist  
17 between England, Scotland, Wales and Northern Ireland. Interestingly, our data indicate that  
18 Scotland and Northern Ireland have the highest proportion of RA patients prescribed DMARDs at  
19 12 months (73.6% and 70.14%, respectively) and Northern Ireland the highest proportion of  
20 patients prescribed methotrexate at 12 months (60.42%; 34.78% in Scotland). This may suggest  
21 that there are lessons to be learned from regions which demonstrate good practice, possibly  
22 through understanding the impact of different networks, interaction and communication and the  
23 impact of different health spend priorities. In addition, it would be interesting to examine if regions  
24 with more aggressive use of DMARDs may use more or less biological therapies. Of note, there is  
25 as yet no benchmark defining the proportion of RA patients who should be prescribed DMARDs.  
26 These drugs are not suitable for *all* RA patients for example those with contraindications and  
27 women trying to conceive. Therefore the ‘ideal’ would be less than 100% of patients and possibly  
28 around 80% seems a realistic estimate of the proportion of RA patients eligible for DMARD  
29 therapy.

34 Several reports emphasize the importance of early and appropriate intervention in RA to optimise  
35 patient outcomes [10, 19]. A meta-analysis assessing the long-term impact of early treatment on  
36 radiographic progression in RA which included 1,133 patients identified a critical period for the  
37 initiation of RA therapy, a ‘therapeutic window of opportunity’ early in the course of RA which was  
38 associated with durable benefit in radiographic progression for a period of up to 5 years. In this  
39 analysis, there was a 33% reduction in long-term progression rates in patients receiving early  
40 therapy for their disease compared with those treated later [20]. Importantly, suboptimal treatment  
41 can lead to joint damage necessitating surgery (with the associated resource implications), and to  
42 a higher mortality risk from cardiovascular disease, a risk which can be mitigated with appropriate  
43 and timely methotrexate treatment [7].



1  
2 In our study, median time from diagnosis to treatment with DMARD, methotrexate or combination  
3 DMARD was 50, 119, and 560 days, respectively. This compares with NICE clinical guideline  
4 recommendations for combination DMARD treatment (including methotrexate) to be used as first-  
5 line therapy within 3 months of the onset of persistent symptoms [10]. Our findings indicate that RA  
6 patients who do receive methotrexate have it prescribed a median 4 months after diagnosis. Prior  
7 to diagnosis many patients in our study were already receiving treatment or therapies that may  
8 ameliorate the symptoms of RA (Appendix 3): this may further delay treatment as RA symptoms  
9 are masked though damage continues and can impact outcomes. Given the likely delay between  
10 symptom onset and diagnosis, the time from symptom onset to methotrexate is probably greater  
11 than 4 months. Furthermore it should be noted that during the most recent time period (2006–April  
12 2010) by 12 months at best only half of diagnosed RA patients were prescribed methotrexate  
13 (51.62%; South Central region).  
14  
15  
16  
17  
18  
19

20  
21 Effective treatments for RA are available [8, 21] however, the results from our study demonstrate  
22 that RA is often suboptimally treated and that regional variation in the management of RA persists  
23 after almost two years of guidance being available. Despite a recommendation for first-line  
24 treatment with combination DMARDs, fewer than 1 in 10 RA patients in the UK receive this  
25 therapy. Although there has been an encouraging increase in DMARD and methotrexate  
26 prescribing post-NICE recommendations, these appear to reflect a general upward trend rather  
27 than rapid implementation and uptake of NICE guidelines. However, it is too early for us to  
28 conclude with any accuracy whether the NICE guidance is influencing DMARD prescribing in the  
29 UK. Recently published data indicate that the challenge of RA guideline implementation is not  
30 restricted to the UK. Assessment of prescribing practices in a US cohort of RA patients before and  
31 after publication of American College of Rheumatology (ACR) treatment recommendations  
32 indicates that at best only around 50% of RA patients with active disease receive care consistent  
33 with the current recommendations [22].  
34  
35  
36  
37  
38  
39  
40  
41

42  
43 The longer term impact of our findings should be considered including the cost of surgical  
44 intervention when RA is suboptimally controlled resulting in joint damage. Policymakers should be  
45 aware of the persistence of variation and assess how best to minimise inequalities in RA care. A  
46 future challenge is how best to disseminate and embed new standards of care into routine clinical  
47 practice especially for chronic diseases such as RA where treatment is undertaken by a range of  
48 healthcare professionals in different settings. This is likely to be ever more relevant as the care of  
49 patients with chronic disease increasingly is being transferred into the community setting.  
50 We conclude that there is a need to optimise dissemination and implementation of high-quality  
51 clinical guidelines, that systems and processes for monitoring implementation should be  
52 developed, and that relevant indicators should be incorporated to ensure that guidelines are  
53  
54  
55  
56  
57  
58  
59  
60

1 followed. Furthermore, accurate information on current prescribing in RA is vital to inform the  
2 development of the planned NICE Quality Standard for RA.  
3  
4  
5

### 6 **Strengths and weaknesses**

7 One of the strengths of our study was the size of the study population with 15,259 patients with  
8 incident RA and of the long-term follow-up of these patients (mean 5.5 years but up to 15.3 years  
9 for some patients). Another is the generalisability of the GPRD database from which our data was  
10 obtained. The GPRD is representative of patients and practices throughout the UK [23], and  
11 encompasses patients treated in primary, secondary and tertiary care. The regional variation  
12 observed in prescribing of DMARDs could be due to regional differences in the incidence of RA.  
13 However, data on age of diagnosis over the duration of the study (Appendix 3) together with data  
14 (for 2009) on point prevalence and incidence rates for RA in the GPRD (Appendix 4) were as  
15 expected, indicating robustness of the data.  
16  
17  
18  
19  
20  
21  
22

23 The coding of the diagnosis of RA is a potential limitation. However, GPRD has been validated in  
24 previous studies [12] and again in this study by the observation of similar demographics for  
25 DMARD versus non-DMARD users. Furthermore, practices are monitored for the accuracy and  
26 completeness of data they submit to the GPRD data by running set queries on the data and as  
27 they are reimbursed by GPRD, penalties can be levied against practices that routinely fail to meet  
28 recording standards [23]. It is also unlikely that our results are compromised by healthcare seeking  
29 behaviour given the similar rates of prescribing of non-antirheumatic medication (statins, aspirin,  
30 antihypertensives and diabetic medications) in the full RA cohort versus matched controls  
31 (Appendix 3). There may be temporal and regional variation in when GPs start to prescribe  
32 DMARDs. In some areas the GP initiates the first DMARD prescription on the advice of the  
33 rheumatologist; in other areas the hospital rheumatologist may initiate prescribing for a period of  
34 time. However by 12 months it seems likely that most prescribing will be via the GP. This is  
35 supported by data from the IMS British Pharmaceutical Index (BPI) / IMS Hospital Pharmacy Index  
36 (HPA) which demonstrates that across all indications, over 90% of all DMARDs prescribing is  
37 carried out within primary care; for methotrexate, around 75–80% of all prescribing is carried out in  
38 the primary care setting [24]. We have recently performed a survey of primary care trust (PCTs) in  
39 England that suggests more than 90% of methotrexate prescribing is ultimately performed in  
40 primary care with 77% by 6 months (personal communication submitted for publication).  
41 Prescribing data for the use of DMARDs appears to be strong in the GPRD. However, as  
42 biological therapies are not usually prescribed by primary care we are unable to comment on their  
43 use as the GPRD only contains very limited information on their prescribing.  
44  
45  
46  
47  
48  
49  
50  
51  
52  
53  
54  
55  
56  
57  
58  
59  
60



### Conclusions

In summary, there has been a substantial improvement in the treatment of RA across the UK over the 15-year period from 1995–2010 with increasing use of DMARDs which currently represent best clinical practice. Despite this improvement, RA remains under-treated according to clinical recommendations and guidelines in the UK [10] and elsewhere [25]. In addition regional variation in DMARD and methotrexate prescribing persists across the UK and publication of national clinical guidelines does not appear to have had a marked impact on standardising prescribing behaviour. Improvement in RA treatment is needed UK-wide: identification and assessment of models of RA treatment that demonstrate implementation of evidence-based best clinical practice would minimise variation, facilitate nationally a uniform approach to RA treatment, to both improve patient outcomes and optimise resource use.

peer review only

1  
2  
3  
4  
5  
6  
7  
8  
9  
10  
11  
12  
13  
14  
15  
16  
17  
18  
19  
20  
21  
22  
23  
24  
25  
26  
27  
28  
29  
30  
31  
32  
33  
34  
35  
36  
37  
38  
39  
40  
41  
42  
43  
44  
45  
46  
47  
48  
49  
50  
51  
52  
53  
54  
55  
56  
57  
58  
59  
60

**Acknowledgements** We thank Claire Housden and Kirsty Roberts (Roche Products Ltd) for procuring project funding and Ify Sargeant (ismedica Ltd) for medical writing support, funded by Roche Products Ltd.

**Contributors:** CJE, NKA, TvS and JC made primary contributions to study design, data collection, data analysis, interpretation of results, and writing the manuscript. All authors contributed to the interpretation of results and critical revision of the manuscript and approved the final manuscript. All authors had full access to all of the data (including statistical reports and tables) in the study and can take responsibility for the integrity of the data and the accuracy of the data analysis. CJE is the guarantor.

**Funding:** This work was supported by Roche-Chugai who funded data generation and analysis by GPRD. Funding sources had no influence on the study design, interpretation of results, or decision to submit the article.

**Competing interests:** All authors have completed the Unified Competing Interest form at [www.icmje.org/coi\\_disclosure.pdf](http://www.icmje.org/coi_disclosure.pdf) (available on request from the corresponding author) and declare: financial support for the submitted work from Roche-Chugai; CJE has acted as speaker for and received research funding from Roche, UCB, Abbott, GSK and Pfizer; NKA has acted as speaker for and received research funding from Roche, Merck, Q-Med, NICOX, Flexion, Servier, GSK, Amgen and Lilly; GPRD (JC and TvS) has received funding from the MHRA, Wellcome Trust, Medical Research Council, NIHR Health Technology Assessment programme, Innovative Medicine Initiative, UK Department of Health, Technology Strategy Board, Seventh Framework Programme EU, various universities, contract research organisations and pharmaceutical companies. The department of Pharmacoepidemiology & Pharmacotherapy, Utrecht Institute for Pharmaceutical Sciences (TvS) has received unrestricted funding for pharmacoepidemiological research from GlaxoSmithKline, Novo Nordisk, the private-public funded Top Institute Pharma ([www.tipharma.nl](http://www.tipharma.nl), includes co-funding from universities, government, and industry), the Dutch Medicines Evaluation Board, and the Dutch Ministry of Health; no other relationships or activities that could appear to have influenced the submitted work.

**Ethical approval:** Ethical approval was not required

**Data sharing:** No additional data available.

**References**

1. Choy EH, Panayi GS. Cytokine pathways and joint inflammation in rheumatoid arthritis. *N Engl J Med* 2001;344:907-16.
2. Wong JB, Ramey DR, Singh G. Long-term morbidity, mortality, and economics of rheumatoid arthritis. *Arthritis Rheum* 2001;44:2746-9.
3. NAO 2009. National Audit Offices. Services for people with rheumatoid arthritis. The Stationary Office. Available at: [www.nao.org.uk/publications/0809/services\\_for\\_people\\_with\\_rheum.aspx](http://www.nao.org.uk/publications/0809/services_for_people_with_rheum.aspx) (accessed April 2012)
4. Ovayolu N, Ovayolu O, Karadag G. Health-related quality of life in ankylosing spondylitis, fibromyalgia syndrome, and rheumatoid arthritis: a comparison with a selected sample of healthy individuals. *Clin Rheumatol* 2011;30:655-64.
5. Fleischmann R. Don't forget traditional DMARDs. Old friends are still useful. *Rheumatology* 2011;50:429-430.
6. Choy EH, Smith CM, Farewell V, et al. Factorial randomised controlled trial of glucocorticoids and combination disease modifying drugs in early rheumatoid arthritis. *Ann Rheum Dis* 2008;67:656-63.
7. Westlake SL, Colebatch AN, Baird J, et al. The effect of methotrexate on cardiovascular disease in patients with rheumatoid arthritis: a systematic literature review. *Rheumatology* 2010;49:295-307.
8. Smolen JS, Landewé R, Breedveld FC, et al. EULAR recommendations for the management of rheumatoid arthritis with synthetic and biological disease-modifying antirheumatic drugs. *Ann Rheum Dis* 2010;69:964-75.
9. Graudal N, Jürgens G. Similar effects of disease-modifying antirheumatic drugs, glucocorticoids, and biologic agents on radiographic progression in rheumatoid arthritis: meta-analysis of 70 randomized placebo-controlled or drug-controlled studies, including 112 comparisons. *Arthritis Rheum* 2010;62:2852-63.
10. NICE clinical guideline 79 – Rheumatoid arthritis. Available at: [www.nice.org.uk/nicemedia/pdf/CG79NICEGuideline.pdf](http://www.nice.org.uk/nicemedia/pdf/CG79NICEGuideline.pdf) (accessed April 2012)
11. Edwards CJ, Arden NK, Fisher D, et al. The changing use of disease-modifying anti-rheumatic drugs in individuals with rheumatoid arthritis from the United Kingdom General Practice Research Database. *Rheumatology* 2005;44:1394-1398.
12. Thomas SL, Edwards CJ, Smeeth L, et al. How Accurate Are Diagnoses for Rheumatoid Arthritis and Juvenile Idiopathic Arthritis in the General Practice Research Database? *Arthritis Rheum* 2008;59:1314-21.
13. Arnett FC, Edworthy SM, Bloch DA, et al. The American Rheumatism Association 1987 revised criteria for the classification of rheumatoid arthritis. *Arthritis Rheum* 1988;31:315-324.
14. van Nies JA, de Jong Z, van der Helm-van Mil AH, et al. Improved treatment strategies reduce the increased mortality risk in early RA patients. *Rheumatology* 2010;49:2210-6.
15. Rigby W, Ferraccioli G, Greenwald M, et al. Effect of rituximab on physical function and quality of life in patients with rheumatoid arthritis previously untreated with methotrexate. *Arthritis Care Res (Hoboken)* 2011;63:711-20.
16. Strand V, Singh JA. Newer biological agents in rheumatoid arthritis: impact on health-related quality of life and productivity. *Drugs*. 2010;70:121-45.
17. Russell AS, Wallenstein GV, Li T, et al. Abatacept improves both the physical and mental health of patients with rheumatoid arthritis who have inadequate response to methotrexate treatment. *Ann Rheum Dis* 2007;66:189-94.
18. Pollard L, Choy EH, Scott DL. The consequences of rheumatoid arthritis: quality of life measures in the individual patient. *Clin Exp Rheumatol*. 2005;23(5 Suppl 39):S43-52.

19. Lard LR, Visser H, Speyer I, et al. Early versus delayed treatment in patients with recent-onset rheumatoid arthritis: comparison of two cohorts who received different treatment strategies. *Am J Med* 2001;111:446–51.
20. Finckh A, Liang MH, van Herckenrode CM, et al. Long-term impact of early treatment on radiographic progression in rheumatoid arthritis: A meta-analysis. *Arthritis Rheum* 2006;55:864–72.
21. Singh JA, Christensen R, Wells GA, et al. Biologics for rheumatoid arthritis: an overview of Cochrane reviews. *Sao Paulo Med J* 2010;128:309–10.
22. Harrold LR, Harrington JT, Curtis JR, et al. Prescribing practices in a US cohort of rheumatoid arthritis patients before and after publication of the American College of Rheumatology treatment recommendations. *Arthritis Rheum* 2012;64:630-8.
23. Lawrenson R, Williams T, Farmer R. Clinical information for research; the use of general practice databases. *J Public Health Med* 1999;21:299–304.
24. IMS 2011. Usage of DMARDs (all indications) in Primary and Secondary Care. Source: IMS British Pharmaceutical Index (BPI) / IMS Hospital Pharmacy Index (HPA) 2011.
25. ACR; American College of Rheumatology Subcommittee on Rheumatoid Arthritis Guidelines. Guidelines for the management of rheumatoid arthritis: 2002 update. *Arthritis Rheum* 2002;46:328–46.

**Table 1:** Proportion of patients prescribed DMARDs within 12 months vs. number diagnosed according to time period across all regions.

| Time period     | No. of patients diagnosed with RA | No. of patients prescribed DMARD (%) | No. of patients prescribed methotrexate (%) | No. of patients prescribed DMARD combination (%) |
|-----------------|-----------------------------------|--------------------------------------|---------------------------------------------|--------------------------------------------------|
| 1995–1999       | 1620                              | 36.9%                                | 11.6%                                       | 0.9%                                             |
| 2000–2005       | 3411                              | 46.1%                                | 23.6%                                       | 3.5%                                             |
| 2006–April 2010 | 3218                              | 60.1%                                | 40.7%                                       | 9.0%                                             |

For peer review only

1  
2  
3  
4  
5  
6  
7 **Regional and temporal variation in the treatment of rheumatoid arthritis across the UK: a**  
8 **descriptive register-based cohort study**  
9

10  
11 **Authors**

12 Christopher J Edwards *consultant rheumatologist*<sup>1,2</sup>, Jennifer Campbell *research scientist*<sup>3</sup>, Tjeerd  
13 Van Staa *head of research*<sup>3,4</sup>, Nigel K Arden *professor of rheumatology*<sup>2,5</sup>.  
14  
15

16 <sup>1</sup>Department of Rheumatology, University Hospital Southampton NHS Foundation Trust,  
17 Southampton, United Kingdom, SO16 6YD; <sup>2</sup>University of Southampton, Southampton, United  
18 Kingdom SO16 6YD; <sup>3</sup>General Practice Research Database, Medicines and Healthcare products  
19 Regulatory Agency, London, United Kingdom SW1W 9SZ; <sup>4</sup>Utrecht Institute for Pharmaceutical  
20 Sciences, Utrecht University, Utrecht, the Netherlands; <sup>5</sup>Nuffield Department of Orthopaedics,  
21 Rheumatology and Musculoskeletal Sciences, University of Oxford, United Kingdom OX3 7HE.  
22  
23

24  
25 Correspondence to: Christopher J Edwards [cedwards@soton.ac.uk](mailto:cedwards@soton.ac.uk)  
26  
27  
28  
29  
30  
31  
32  
33  
34  
35  
36  
37  
38  
39  
40  
41  
42  
43  
44  
45  
46  
47  
48  
49  
50  
51  
52  
53  
54  
55  
56  
57  
58  
59  
60

## Abstract

**Objectives:** To describe current DMARD prescription in rheumatoid arthritis (RA) with reference to best practice and to identify temporal and regional trends in the UK

**Design:** Descriptive, register-based cohort study

**Participants:** Permanently registered patients aged  $\geq 18$  years with a recorded diagnosis of RA between 01/01/1995 and 31/03/2010 and matched controls. Participants with RA were identified through screening of all patients in the General Practice Research Database (GPRD) with a clinical or referral record for RA and at least one day of follow-up.

**Setting:** 639 general practices in the UK supplying data to the GPRD

**Main outcome measures:** Medication prescribing between 3 and 12 months of RA diagnosis by region and time period (1995–1999, 2000–2005, and 2006–April 2010).

**Results:** Of the 35,911 patients in the full RA cohort, 15,259 patients (42%) had incident RA. Analysis of prescribing in incident RA patients demonstrated that between 1995 (baseline) and 2010 there was a substantial increase in DMARD, and specifically methotrexate, prescribing across all regions with a less marked increase in combination DMARD prescribing. Taking 12-month prescribing as a snapshot: DMARD prescribing was 19–49% at baseline increasing to 45–74% by 2006–April 2010; methotrexate prescribing was 4–16% at baseline increasing to 32–60%; combination DMARD prescribing was 0–8% at baseline increasing to 3–17%. However there was marked regional variation in the proportion of RA patients receiving DMARD regardless of time period.

**Conclusions:** There has been a substantial increase in prescribing of DMARDs for RA since 1995; however regional variation persists across the UK with relative under-treatment, according to established best practice and published national guidelines. Improved implementation of evidence-based best clinical practice to facilitate removal of treatment variation is warranted. This may occur as a result of the implementation of published national guidance.

**Key words:** *Rheumatoid arthritis, DMARDs, General Practice Research Database, regional variation.*

## Article summary

### Article focus:

- Over recent years there have been fundamental changes in the approach to treatment of rheumatoid arthritis (RA) with a move towards early and more aggressive treatment
- Disease-modifying anti-rheumatic drugs (DMARDs) are effective in the treatment of RA and their early use is recommended in national and international clinical guidelines and recommendations.
- We describe both temporal and regional trends in DMARD therapy for RA throughout the UK over a 15-year period and reveal whether the latest knowledge on how RA should be treated has been translated into actual clinical practice

### Key messages:

- There has been a substantial increase in DMARD prescription for RA and an increase in the proportion of patients prescribed DMARD earlier in the course of their disease between 1995 and 2010
- However, RA remains relatively under-treated according to best practice and published national guidelines, and regional variation persists
- There is a need to optimise dissemination and implementation of high-quality clinical guidelines and to monitor implementation.

### Strengths and limitations of this study:

- One of the strengths of the study was the size of the study population with 15,259 patients with incident RA and of the long-term follow-up of these patients (mean 5.5 years but up to 15.3 years for some patients). Another is the generalisability of the General Practice Research Database (GPRD) database from which our data was obtained.
- The coding of the diagnosis of RA is a potential limitation; however, GPRD has been validated in previous studies and in this study by the observation of similar demographics for DMARD versus non-DMARD users.



## Introduction

Rheumatoid arthritis (RA) is a chronic, systemic, autoimmune disease, the most common form of chronic joint inflammation [1], and is associated with substantial long-term morbidity, mortality and health-care costs [2]. A recent report from the National Audit Office (NAO) estimates that around 580,000 people have RA in England and that 26,000 patients are diagnosed with RA each year [3]. RA can have a profound effect on patients through the physical manifestations of the disease, associated complications and impact on health-related quality of life (HRQOL) [4]. Disease-modifying anti-rheumatic drugs (DMARDs), used either as monotherapy or in combination, can control disease activity, reduce joint erosions [5], improve quality of life [6] and also reduce the cardiovascular morbidity associated with RA [7].

Over recent years there have been fundamental changes in the approach to treatment of RA with the availability of newer therapies and a move towards early and more aggressive treatment [8]. A recent meta-analysis including data from 70 trials, demonstrates that aggressive treatment with combination DMARDs is able to reduce structural joint damage [9]. DMARDs have a critical role in the management of RA and are central to both European recommendations [8] and UK guidance [10]. Issued in February 2009, NICE clinical guidelines for the treatment of RA recommend a combination of DMARDs (including methotrexate and at least one other DMARD, plus short-term glucocorticoids) as first-line treatment ideally within 3 months of symptom onset for people with recently diagnosed active RA [10]. [The NICE guidance serves as an example of best practice although its publication in 2009 preclude us from determining accurately whether its recommendations have been taken up in this study.](#)

Much information regarding the use of DMARDs is from published experience within the tertiary care setting however it is unclear how well this reflects routine practice in secondary and primary care settings across the UK. Despite the demonstrated efficacy of DMARDs, data from over 34,000 primary care records collected between 1987 and 2002 indicate that only half of patients diagnosed with RA receive DMARD therapy [4211]. The UK General Practice Research Database (GPRD) is an electronic database of primary care medical records. GPRD contains data on over 8% of the population and has data on over 11 million individuals (cumulative) with over 5 million currently active [42, 4311, 12]. The GPRD has been used in several studies and the validity of an RA diagnosis in GPRD appears to be high for patients with specific characteristics [when using the American College of Rheumatology \(ACR\) diagnostic criteria as the standard \[12, 1313\]. All patients in the UK will be seen by a primary care physician or general practitioner in addition to any secondary care physician needed for care of a specific illness. Although individuals with RA were recruited to the GPRD by a general practitioner the validation studies described show that a rheumatologist in secondary care will also have seen the vast majority of individuals \[4312\].](#) The objectives of this study were to provide an updated view of current DMARD prescribing in RA with

1  
2  
3  
4  
5  
6 reference to best practice, to describe both temporal and regional trends in DMARD therapy for RA  
7 throughout the UK over a 15-year period, and to assess whether the latest knowledge on how RA  
8 should be treated has been translated into actual clinical practice.  
9

## 10 11 **Methods**

### 12 *Data source*

13  
14 We obtained data for this study from the GPRD which collates the computerized medical records of  
15 GPs. The data recorded in the GPRD include demographic information, prescription details, clinical  
16 events, preventive care provided, specialist referrals, hospital admissions, and major outcomes.  
17  
18 The GPRD contains the complete anonymised patient medical records from GPs who use the  
19 system from In Practice Systems (a software package used for patient medical records) and who  
20 agree to adhere to "Recording Guidelines" that are subject to detailed quality control checks of  
21 data at both practice and individual patient level.  
22

### 23 24 *Study design and population*

25 We conducted a descriptive, cohort study in permanently registered patients aged 18 years and  
26 over with a recorded diagnosis of RA between 01/01/1995 and 31/03/2010. We identified our  
27 study population through screening of all patients in the GPRD (n=11,480,996); who had a clinical  
28 or referral record for RA (n=63,238); with a record on or after 01/01/1995 (n=45,057); where this  
29 record was on or after the start of follow up (latest of patient registration or practice up-to-standard  
30 [UTS] date) (n=36,567); who were aged at least 18 at this date (n=36,035); and who had at least  
31 one day of follow-up (n=35,911). We used the same Read codes as in the previous RA validation  
32 study [[4312](#)].  
33  
34  
35

36  
37 The period of follow-up was from the date of first RA record up (i.e. index date) to the date of  
38 censoring (i.e. latest GPRD data collection, patient's transfer out of the practice, or patient's death,  
39 whichever date came first). The study population included patients with a record of RA prior to start  
40 of GPRD data collection (i.e., prevalent cases) and also RA patients with a first-ever record of RA  
41 at least 1 year after start of GPRD data collection (i.e. incident cases). Each RA patient was  
42 matched by age, gender and practice to three patients without a record of inflammatory disease  
43 (listed in Appendix 1).  
44  
45  
46

### 47 48 *Analysis of utilisation characteristics*

49 We conducted an analysis to describe the exposure characteristics of incident RA patients from  
50 index date. We measured the prevalence of use of different medications stratified by age at  
51 diagnosis (at date of first-ever record of RA), age at time of measurement, sex, calendar year and  
52 strategic health authority. We determined the prevalence of medication use by evaluating GP  
53 prescribing in the 6 months before the index date of the following DMARDS: methotrexate;  
54  
55  
56

1  
2  
3  
4  
5  
6 sulfasalazine; hydroxychloroquine; gold (sodium aurothiomalate); auranofin; penicillamine;  
7 leflunomide; azathioprine; ciclosporin; and cyclophosphamide. Of note, GPRD captures information  
8 on all prescriptions issued both acute and repeat, along with dosage instructions.  
9

## 10 11 **Results**

### 12 *Baseline characteristics*

13  
14 The full cohort included both incident and prevalent RA cases and comprised a total of 35,911  
15 patients. RA patients and matched controls were well balanced in terms of age, gender and  
16 socioeconomic status. However, there was a higher prevalence of smokers and a lower prevalence  
17 of drinkers among RA patients. Of the 35,911 patients in the full RA cohort, a subgroup of 15,259  
18 patients (42%) had incident RA. With regard to treatment, there was a 10-fold increase in  
19 prescribing of prednisolone for incident RA patients versus matched controls and a 9-fold increase  
20 in prescribing of non-steroidal anti-inflammatory drugs (NSAIDs) in the 6 months prior to diagnosis.  
21  
22

### 23 24 *Prescription practice by region and time period for incident patients*

#### 25 *General trends*

26  
27 The data was analysed to assess the proportion of incident RA patients prescribed either DMARD,  
28 methotrexate or combination DMARD within 3, 6 or 12 months of diagnosis according to  
29 geographic region and according to time period (1995–1999, 2000–2005, and 2006–April 2010)  
30 (Appendix 2). In general, the data indicate that across all regions and within each time period, the  
31 proportion of patients prescribed DMARDs including methotrexate increased between 3 months  
32 and 12 months. However, increases in the proportion of patients prescribed combination DMARDs  
33 were less marked with either no or little increase between 3–6 and 6–12 months but a modest  
34 overall increase between 3 and 12 months.  
35  
36

#### 37 38 *Temporal change in medication prescribing*

39  
40 In order to provide a snapshot of change in DMARD usage over time, the data was analysed to  
41 assess the proportion of patients prescribed either any DMARD, methotrexate or any combination  
42 of DMARDs within 12 months according to time period (1995–1999, 2000–2005, and 2006–April  
43 2010) (Table 1). There was a substantial increase in 12-month prescribing of DMARD (from 36.9%  
44 to 60.1%), methotrexate (from 11.6% to 40.7%), and combination DMARD (from 0.9% to 9.1%)  
45 over the 15-year time period. Analysis of regional data demonstrated an increase in the proportion  
46 of patients prescribed DMARDs at 12 months across all regions during the 15-year time period  
47 (Figure 1). At baseline (1995–1999) between 19.29% (East Midlands) and 49.06% (Northern  
48 Ireland) of patients were prescribed DMARDs at 12 months; by 2006–April 2010 the rate of  
49 prescribing had increased from between 45.32% (London) to 73.6% (Scotland). A general trend for  
50 increased prescription of DMARDs/methotrexate between 3–12 months was also evident across all  
51 regions. Of note, combination DMARDs tended to be prescribed after 3 months with increasing  
52  
53  
54  
55

1  
2  
3  
4  
5  
6 prescription between 6 and 12 months and between 1995–April 2010 across all regions (Appendix  
7 2).

### 8 9 *Regional variation*

10 Analysis of data focusing on prescribing of DMARDs at 12 months demonstrates substantial  
11 regional variation in DMARD prescribing regardless of time period (Figure 21). Regional variation  
12 in DMARD prescribing at 12 months ranged from 19.29–49.06% between 1995–1999; from 36.09–  
13 60.17% between 2000–2005; and from 45.32–73.6% between 2006–April 2010. The regional  
14 difference in the proportion of patients prescribed DMARD at 12 months ranged from 24–30%  
15 within each time period. Prescribing patterns of methotrexate and combination DMARDs also  
16 varied from region to region regardless of time period (Appendix 2).  
17  
18  
19

### 20 21 *Time from diagnosis to treatment*

22 The data for incident patients with UTS data of five years was analysed to evaluate time from  
23 diagnosis to treatment with either DMARD and/or methotrexate. For 5,513 patients prescribed a  
24 DMARD, the median time from diagnosis to treatment was 50 days (interquartile range [IQR] 0–  
25 1,826); for 3,754 patients prescribed methotrexate, the median time from diagnosis to treatment  
26 was 119 days (IQR 0–1,826); while for 1,310 patients prescribed combination DMARD the median  
27 time from diagnosis to treatment was 560 days (IQR 0–1,826).  
28  
29  
30

## 31 32 **Discussion**

33 We have demonstrated that between 1995 and 2010 there was a substantial increase in DMARD,  
34 methotrexate and combination DMARD prescribing across all regions. In this 15-year period, 12-  
35 month prescribing of DMARD almost doubled rising from 36.9% to 60.1%; 12-month prescribing of  
36 methotrexate quadrupled from 11.6% to 40.7%; and 12-month prescribing of combination DMARD  
37 showed a ten-fold increase from 0.9% to 9.0%. However, some 40% of patients were not receiving  
38 DMARD at 12 months despite national clinical guidelines recommending this therapy within 3  
39 months of diagnosis [10] indicating a relative under-treatment of RA. In addition, the marked  
40 regional variation in the prescription of DMARDs within the UK persists and has not decreased with  
41 time. To our knowledge, this is the first time that data on the use of DMARDs over this time period  
42 has been examined in a large RA population in the UK.  
43  
44  
45  
46

## 47 48 **Clinical implications**

49 Several studies indicate that appropriate and timely use of DMARDs and biologics for  
50 management of RA can improve outcomes such as mortality risk and HRQOL [16, 17, 18, 19, 14,  
51 15, 16, 17]. However previous studies indicate that many patients receive insufficient treatment  
52 [20, 18] and that there is variation in practice in the management of RA [3]. Our current data confirm  
53 the significant regional variation both in the timing of DMARD or methotrexate therapy and in the  
54  
55  
56  
57  
58  
59  
60

1  
2  
3  
4  
5  
6 proportion of patients diagnosed with RA receiving these therapies at specific time points. Based  
7 on the latest data from 2006–April 2010 for regions in England (i.e. excluding Wales, Scotland and  
8 Northern Ireland), the proportion of RA patients receiving DMARDs at 12 months between 2006–  
9 April 2010 ranges from 45.32% (London) to 66.83% (South Central). In addition, the proportion of  
10 RA patients in England receiving methotrexate at 12 months in this latest time period ranges from  
11 32.11% (North East) to 51.62% (South Central); at best two-thirds of RA patients in England are  
12 being prescribed DMARDs and approximately one-half of RA patients in England are being  
13 prescribed methotrexate by 12 months (Appendix 2).  
14  
15

16  
17  
18 The underlying reasons for this variation are not clear but could be due to several factors such as  
19 differences in RA health spend or differences in implementation and sharing of best practice. With  
20 the devolution of the NHS in 1999, differences in health services management and delivery exist  
21 between England, Scotland, Wales and Northern Ireland. Interestingly, our data indicate that  
22 Scotland and Northern Ireland have the highest proportion of RA patients prescribed DMARDs at  
23 12 months (73.6% and 70.14%, respectively) and Northern Ireland the highest proportion of  
24 patients prescribed methotrexate at 12 months (60.42%; 34.78% in Scotland). This may suggest  
25 that there are lessons to be learned from regions which demonstrate good practice, possibly  
26 through understanding the impact of different networks, interaction and communication and the  
27 impact of different health spend priorities. In addition, it would be interesting to examine if regions  
28 with more aggressive use of DMARDs may use more or less biological therapies. Of note, there is  
29 as yet no benchmark defining the proportion of RA patients who should be prescribed DMARDs.  
30 These drugs are not suitable for *all* RA patients for example those with contraindications and  
31 women trying to conceive. Therefore the 'ideal' would be less than 100% of patients and possibly  
32 around 80% seems a realistic estimate of the proportion of RA patients eligible for DMARD  
33 therapy.  
34  
35  
36  
37  
38

39  
40 Several reports emphasize the importance of early and appropriate intervention in RA to optimise  
41 patient outcomes [10, 2419]. A meta-analysis assessing the long-term impact of early treatment on  
42 radiographic progression in RA which included 1,133 patients identified a critical period for the  
43 initiation of RA therapy, a 'therapeutic window of opportunity' early in the course of RA which was  
44 associated with durable benefit in radiographic progression for a period of up to 5 years. In this  
45 analysis, there was a 33% reduction in long-term progression rates in patients receiving early  
46 therapy for their disease compared with those treated later [2220]. Importantly, suboptimal  
47 treatment can lead to joint damage necessitating surgery (with the associated resource  
48 implications), and to a higher mortality risk from cardiovascular disease, a risk which can be  
49 mitigated with appropriate and timely methotrexate treatment [7].  
50  
51  
52  
53  
54

1  
2  
3  
4  
5  
6 In our study, median time from diagnosis to treatment with DMARD, methotrexate or combination  
7 DMARD was 50, 119, and 560 days, respectively. This compares with NICE clinical guideline  
8 recommendations for combination DMARD treatment (including methotrexate) to be used as first-  
9 line therapy within 3 months of the onset of persistent symptoms [10]. Our findings indicate that RA  
10 patients who do receive methotrexate have it prescribed a median 4 months after diagnosis. Prior  
11 to diagnosis many patients in our study were already receiving treatment or therapies that may  
12 ameliorate the symptoms of RA (Appendix 3); this may further delay treatment as RA symptoms  
13 are masked though damage continues and can impact outcomes. Given the likely delay between  
14 symptom onset and diagnosis, the time from symptom onset to methotrexate is probably greater  
15 than 4 months. Furthermore it should be noted that during the most recent time period (2006–April  
16 2010) by 12 months at best only half of diagnosed RA patients were prescribed methotrexate  
17 (51.62%; South Central region).  
18  
19  
20  
21  
22

23 Effective treatments for RA are available [8, 2321] however, the results from our study demonstrate  
24 that RA is often suboptimally treated and that regional variation in the management of RA persists  
25 after almost two years of guidance being available. Despite a recommendation for first-line  
26 treatment with combination DMARDs, fewer than 1 in 10 RA patients in the UK receive this  
27 therapy. Although there has been an encouraging increase in DMARD and methotrexate  
28 prescribing post-NICE recommendations, these appear to reflect a general upward trend rather  
29 than rapid implementation and uptake of NICE guidelines. However, it is too early for us to  
30 conclude with any accuracy whether the NICE guidance is influencing DMARD prescribing in the  
31 UK. Recently published data indicate that the challenge of RA guideline implementation is not  
32 restricted to the UK. Assessment of prescribing practices in a US cohort of RA patients before and  
33 after publication of American College of Rheumatology (ACR) treatment recommendations  
34 indicates that at best only around 50% of RA patients with active disease receive care consistent  
35 with the current recommendations [2522].  
36  
37  
38  
39  
40

41 The longer term impact of our findings should be considered including the cost of surgical  
42 intervention when RA is suboptimally controlled resulting in joint damage. Policymakers should be  
43 aware of the persistence of variation and assess how best to minimise inequalities in RA care. A  
44 future challenge is how best to disseminate and embed new standards of care into routine clinical  
45 practice especially for chronic diseases such as RA where treatment is undertaken by a range of  
46 healthcare professionals in different settings. This is likely to be ever more relevant as the care of  
47 patients with chronic disease increasingly is being transferred into the community setting.  
48 We conclude that there is a need to optimise dissemination and implementation of high-quality  
49 clinical guidelines, that systems and processes for monitoring implementation should be  
50 developed, and that relevant indicators should be incorporated to ensure that guidelines are  
51  
52  
53  
54  
55  
56  
57  
58  
59  
60



1  
2  
3  
4  
5  
6 followed. Furthermore, accurate information on current prescribing in RA is vital to inform the  
7 development of the planned NICE Quality Standard for RA.  
8  
9

### 10 **Strengths and weaknesses**

11 One of the strengths of our study was the size of the study population with 15,259 patients with  
12 incident RA and of the long-term follow-up of these patients (mean 5.5 years but up to 15.3 years  
13 for some patients). Another is the generalisability of the GPRD database from which our data was  
14 obtained. The GPRD is representative of patients and practices throughout the UK [4423], and  
15 encompasses patients treated in primary, secondary and tertiary care. The regional variation  
16 observed in prescribing of DMARDs could be due to regional differences in the incidence of RA.  
17 However, data on age of diagnosis over the duration of the study (Appendix 3) together with data  
18 (for 2009) on point prevalence and incidence rates for RA in the GPRD (Appendix 4) were as  
19 expected, indicating robustness of the data.  
20  
21  
22  
23

24 The coding of the diagnosis of RA is a potential limitation. However, GPRD has been validated in  
25 previous studies [4312] and again in this study by the observation of similar demographics for  
26 DMARD versus non-DMARD users. Furthermore, practices are monitored for the accuracy and  
27 completeness of data they submit to the GPRD data by running set queries on the data and as  
28 they are reimbursed by GPRD, penalties can be levied against practices that routinely fail to meet  
29 recording standards [4423]. It is also unlikely that our results are compromised by healthcare  
30 seeking behaviour given the similar rates of prescribing of non-antirheumatic medication (statins,  
31 aspirin, antihypertensives and diabetic medications) in the full RA cohort versus matched controls  
32 (Appendix 3). There may be temporal and regional variation in when GPs start to prescribe  
33 DMARDs. In some areas the GP initiates the first DMARD prescription on the advice of the  
34 rheumatologist; in other areas the hospital rheumatologist may initiate prescribing for a period of  
35 time. However by 12 months it seems likely that most prescribing will be via the GP. This is  
36 supported by data from the IMS British Pharmaceutical Index (BPI) / IMS Hospital Pharmacy Index  
37 (HPA) which demonstrates that across all indications, over 90% of all DMARDs prescribing is  
38 carried out within primary care; for methotrexate, around 75–80% of all prescribing is carried out in  
39 the primary care setting [4524]. We have recently performed a survey of primary care trust (PCTs)  
40 in England that suggests more than 90% of methotrexate prescribing is ultimately performed in  
41 primary care with 77% by 6 months (personal communication submitted for publication).  
42 Prescribing data for the use of DMARDs appears to be strong in the GPRD. However, as  
43 biological therapies are not usually prescribed by primary care we are unable to comment on their  
44 use as the GPRD only contains very limited information on their prescribing.  
45  
46  
47  
48  
49  
50  
51  
52  
53  
54  
55  
56  
57  
58  
59  
60

## Conclusions

In summary, there has been a substantial improvement in the treatment of RA across the UK over the 15-year period from 1995–2010 with increasing use of DMARDs which currently represent best clinical practice. Despite this improvement, RA remains under-treated according to clinical recommendations and guidelines in the UK [10] and elsewhere [2425]. In addition regional variation in DMARD and methotrexate prescribing persists across the UK and publication of national clinical guidelines does not appear to have had a marked impact on standardising prescribing behaviour.

Improvement in RA treatment is needed UK-wide: identification and assessment of models of RA treatment that demonstrate implementation of evidence-based best clinical practice would minimise variation, facilitate nationally a uniform approach to RA treatment, to both improve patient outcomes and optimise resource use.



1  
2  
3  
4  
5  
6 **Acknowledgements** We thank Claire Housden and Kirsty Roberts (Roche Products Ltd) for  
7 procuring project funding and Ify Sargeant (ismedica Ltd) for medical writing support, funded by  
8 Roche Products Ltd.  
9

10 **Contributors:** CJE, NKA, TvS and JC made primary contributions to study design, data collection,  
11 data analysis, interpretation of results, and writing the manuscript. All authors contributed to the  
12 interpretation of results and critical revision of the manuscript and approved the final manuscript.  
13 All authors had full access to all of the data (including statistical reports and tables) in the study  
14 and can take responsibility for the integrity of the data and the accuracy of the data analysis. CJE  
15 is the guarantor.  
16

17 **Funding:** This work was supported by Roche-Chugai who funded data generation and analysis by  
18 GPRD. Funding sources had no influence on the study design, interpretation of results, or decision  
19 to submit the article.  
20

21 **Competing interests:** All authors have completed the Unified Competing Interest form at  
22 [www.icmje.org/coi\\_disclosure.pdf](http://www.icmje.org/coi_disclosure.pdf) (available on request from the corresponding author) and  
23 declare: financial support for the submitted work from Roche-Chugai; CJE has acted as speaker  
24 for and received research funding from Roche, UCB, Abbott, GSK and Pfizer; NKA has acted as  
25 speaker for and received research funding from Roche, Merck, Q-Med, NICOX, Flexion, Servier,  
26 GSK, Amgen and Lilly; GPRD (JC and TvS) has received funding from the MHRA, Wellcome  
27 Trust, Medical Research Council, NIHR Health Technology Assessment programme, Innovative  
28 Medicine Initiative, UK Department of Health, Technology Strategy Board, Seventh Framework  
29 Programme EU, various universities, contract research organisations and pharmaceutical  
30 companies. The department of Pharmacoepidemiology & Pharmacotherapy, Utrecht Institute for  
31 Pharmaceutical Sciences (TvS) has received unrestricted funding for pharmacoepidemiological  
32 research from GlaxoSmithKline, Novo Nordisk, the private-public funded Top Institute Pharma  
33 ([www.tipharma.nl](http://www.tipharma.nl), includes co-funding from universities, government, and industry), the Dutch  
34 Medicines Evaluation Board, and the Dutch Ministry of Health; no other relationships or activities  
35 that could appear to have influenced the submitted work.  
36

37 **Ethical approval:** Ethical approval was not required  
38

39 **Data sharing:** No additional data available.  
40  
41  
42  
43  
44  
45  
46  
47  
48  
49  
50  
51  
52  
53  
54  
55  
56  
57  
58  
59  
60

## References

1. [Choy EH, Panayi GS. Cytokine pathways and joint inflammation in rheumatoid arthritis. \*N Engl J Med\* 2001;344:907-16.](#)
4. [Cooney JK, Law RJ, Matschke V, et al. Benefits of exercise in rheumatoid arthritis. \*J Aging Res\* 2011. Article ID 681640, 14 pages, 2011. doi:10.4061/2011/681640.](#)
2. Wong JB, Ramey DR, Singh G. Long-term morbidity, mortality, and economics of rheumatoid arthritis. *Arthritis Rheum* 2001;44:2746-9.
3. NAO 2009. National Audit Offices. Services for people with rheumatoid arthritis. The Stationary Office. Available at: [www.nao.org.uk/publications/0809/services\\_for\\_people\\_with\\_rheum.aspx](http://www.nao.org.uk/publications/0809/services_for_people_with_rheum.aspx) (accessed April 2012)
4. Ovayolu N, Ovayolu O, Karadag G. Health-related quality of life in ankylosing spondylitis, fibromyalgia syndrome, and rheumatoid arthritis: a comparison with a selected sample of healthy individuals. *Clin Rheumatol* 2011;30:655-64.
5. Fleischmann R. Don't forget traditional DMARDs. Old friends are still useful. *Rheumatology* 2011;50:429-430.
6. Choy EH, Smith CM, Farewell V, et al. Factorial randomised controlled trial of glucocorticoids and combination disease modifying drugs in early rheumatoid arthritis. *Ann Rheum Dis* 2008;67:656-63.
7. Westlake SL, Colebatch AN, Baird J, et al. The effect of methotrexate on cardiovascular disease in patients with rheumatoid arthritis: a systematic literature review. *Rheumatology* 2010;49:295-307.
8. Smolen JS, Landewé R, Breedveld FC, et al. EULAR recommendations for the management of rheumatoid arthritis with synthetic and biological disease-modifying antirheumatic drugs. *Ann Rheum Dis* 2010;69:964-75.
9. Graudal N, Jürgens G. Similar effects of disease-modifying antirheumatic drugs, glucocorticoids, and biologic agents on radiographic progression in rheumatoid arthritis: meta-analysis of 70 randomized placebo-controlled or drug-controlled studies, including 112 comparisons. *Arthritis Rheum* 2010;62:2852-63.
10. NICE clinical guideline 79 – Rheumatoid arthritis. Available at: [www.nice.org.uk/nicemedia/pdf/CG79NICEGuideline.pdf](http://www.nice.org.uk/nicemedia/pdf/CG79NICEGuideline.pdf) (accessed April 2012)
11. [Visser K, van der Heijde D. Optimal dosage and route of administration of methotrexate in rheumatoid arthritis: a systematic review of the literature. \*Ann Rheum Dis\* 2009;68:1094-1099.](#)
- 42.11. Edwards CJ, Arden NK, Fisher D, et al. The changing use of disease-modifying anti-rheumatic drugs in individuals with rheumatoid arthritis from the United Kingdom General Practice Research Database. *Rheumatology* 2005;44:1394-1398.
- 43.12. Thomas SL, Edwards CJ, Smeeth L, et al. How Accurate Are Diagnoses for Rheumatoid Arthritis and Juvenile Idiopathic Arthritis in the General Practice Research Database? *Arthritis Rheum* 2008;59:1314-21.
- 44.13. [Arnett FC, Edworthy SM, Bloch DA, et al. The American Rheumatism Association 1987 revised criteria for the classification of rheumatoid arthritis. \*Arthritis Rheum\* 1988;31:315-324.](#)
14. [van Nies JA, de Jong Z, van der Helm-van Mil AH, et al. Improved treatment strategies reduce the increased mortality risk in early RA patients. \*Rheumatology\* 2010;49:2210-6.](#)
15. [Rigby W, Ferraccioli G, Greenwald M, et al. Effect of rituximab on physical function and quality of life in patients with rheumatoid arthritis previously untreated with methotrexate. \*Arthritis Care Res \(Hoboken\)\* 2011;63:711-20.](#)

Formatted: Bullets and Numbering

Formatted: Spanish (International Sort)

16. Strand V, Singh JA. Newer biological agents in rheumatoid arthritis: impact on health-related quality of life and productivity. *Drugs*. 2010;70:121–45.
- 13.17. Russell AS, Wallenstein GV, Li T, et al. Abatacept improves both the physical and mental health of patients with rheumatoid arthritis who have inadequate response to methotrexate treatment. *Ann Rheum Dis* 2007;66:189–94.
18. Pollard L, Choy EH, Scott DL. The consequences of rheumatoid arthritis: quality of life measures in the individual patient. *Clin Exp Rheumatol*. 2005;23(5 Suppl 39):S43–52.
19. Lard LR, Visser H, Speyer I, et al. Early versus delayed treatment in patients with recent-onset rheumatoid arthritis: comparison of two cohorts who received different treatment strategies. *Am J Med* 2001;111:446–51.
20. Finckh A, Liang MH, van Herckenrode CM, et al. Long-term impact of early treatment on radiographic progression in rheumatoid arthritis: A meta-analysis. *Arthritis Rheum* 2006;55:864–72.
21. Singh JA, Christensen R, Wells GA, et al. Biologics for rheumatoid arthritis: an overview of Cochrane reviews. *Sao Paulo Med J* 2010;128:309–10.
22. Harrold LR, Harrington JT, Curtis JR, et al. Prescribing practices in a US cohort of rheumatoid arthritis patients before and after publication of the American College of Rheumatology treatment recommendations. *Arthritis Rheum* 2012;64:630–8.
- 14.23. Lawrenson R, Williams T, Farmer R. Clinical information for research; the use of general practice databases. *J Public Health Med* 1999;21:299–304.
- 15.24. IMS 2011. Usage of DMARDs (all indications) in Primary and Secondary Care. Source: IMS British Pharmaceutical Index (BPI) / IMS Hospital Pharmacy Index (HPA) 2011.
- 16.van Nies JA, de Jong Z, van der Helm-van Mil AH, et al. Improved treatment strategies reduce the increased mortality risk in early RA patients. *Rheumatology* 2010;49:2210–6.
- 17.Rigby W, Ferraccioli G, Greenwald M, et al. Effect of rituximab on physical function and quality of life in patients with rheumatoid arthritis previously untreated with methotrexate. *Arthritis Care Res (Hoboken)* 2011;63:711–20.
- 18.Strand V, Singh JA. Newer biological agents in rheumatoid arthritis: impact on health-related quality of life and productivity. *Drugs*. 2010;70:121–45.
- 19.Russell AS, Wallenstein GV, Li T, et al. Abatacept improves both the physical and mental health of patients with rheumatoid arthritis who have inadequate response to methotrexate treatment. *Ann Rheum Dis* 2007;66:189–94.
- 20.Pollard L, Choy EH, Scott DL. The consequences of rheumatoid arthritis: quality of life measures in the individual patient. *Clin Exp Rheumatol*. 2005;23(5 Suppl 39):S43–52.
- 21.Lard LR, Visser H, Speyer I, et al. Early versus delayed treatment in patients with recent-onset rheumatoid arthritis: comparison of two cohorts who received different treatment strategies. *Am J Med* 2001;111:446–51.
- 22.Finckh A, Liang MH, van Herckenrode CM, et al. Long term impact of early treatment on radiographic progression in rheumatoid arthritis: A meta analysis. *Arthritis Rheum* 2006;55:864–72.
- 23.Singh JA, Christensen R, Wells GA, et al. Biologics for rheumatoid arthritis: an overview of Cochrane reviews. *Sao Paulo Med J* 2010;128:309–10.
- 24.25. ACR; American College of Rheumatology Subcommittee on Rheumatoid Arthritis Guidelines. Guidelines for the management of rheumatoid arthritis: 2002 update. *Arthritis Rheum* 2002;46:328–46.

Formatted: Bullets and Numbering

Formatted: Spanish (International Sort)

Formatted: Indent: Left: 0.5", No bullets or numbering

Formatted: Bullets and Numbering

Formatted: Font: Italic

Formatted: Indent: Left: 0.5", No bullets or numbering

Formatted: Bullets and Numbering

1  
2  
3  
4  
5  
6 [25. Harrold LR, Harrington JT, Curtis JR, et al. Prescribing practices in a US cohort of](#)  
7 [rheumatoid arthritis patients before and after publication of the American College of](#)  
8 [Rheumatology treatment recommendations. Arthritis Rheum 2012;64:630-8.](#)  
9  
10  
11  
12  
13  
14  
15  
16  
17  
18  
19  
20  
21  
22  
23  
24  
25  
26  
27  
28  
29  
30  
31  
32  
33  
34  
35  
36  
37  
38  
39  
40  
41  
42  
43  
44  
45  
46  
47  
48  
49  
50  
51  
52  
53  
54  
55  
56  
57  
58  
59  
60

For peer review only

**Table 1:** Proportion of patients prescribed DMARDs within 12 months vs. number diagnosed according to time period across all regions.

| Time period     | No. of patients diagnosed with RA | No. of patients prescribed DMARD (%) | No. of patients prescribed methotrexate (%) | No. of patients prescribed DMARD combination (%) |
|-----------------|-----------------------------------|--------------------------------------|---------------------------------------------|--------------------------------------------------|
| 1995–1999       | 1620                              | 36.9%                                | 11.6%                                       | 0.9%                                             |
| 2000–2005       | 3411                              | 46.1%                                | 23.6%                                       | 3.5%                                             |
| 2006–April 2010 | 3218                              | 60.1%                                | 40.7%                                       | 9.0%                                             |

1  
2  
3  
4  
5  
6  
7  
8  
9  
10  
11  
12  
13  
14  
15  
16  
17  
18  
19  
20  
21  
22  
23  
24  
25  
26  
27  
28  
29  
30  
31  
32  
33  
34  
35  
36  
37  
38  
39  
40  
41  
42  
43  
44  
45  
46  
47  
48  
49  
50  
51  
52  
53  
54  
55  
56  
57  
58  
59  
60

**DMARD at  
12 months 1995-1999**

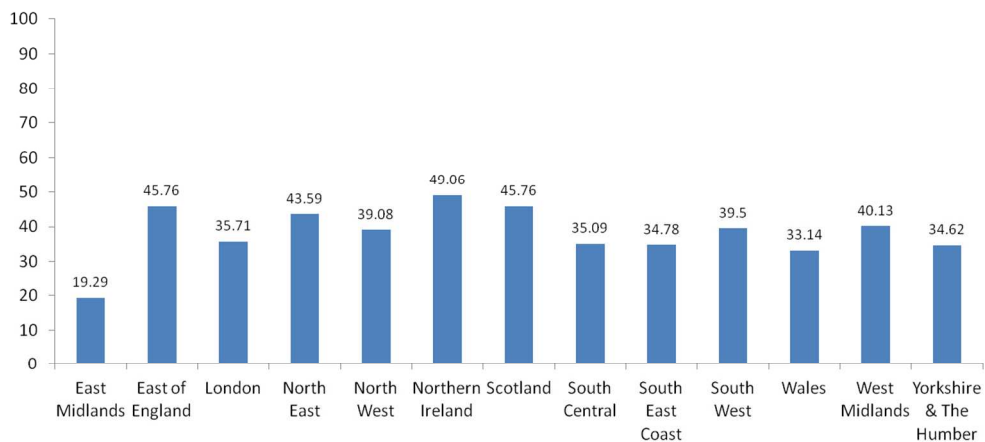

Figure 1a: Percentage of patients prescribed DMARDs at 12 months by region for the time period 1995-1999.  
228x125mm (150 x 150 DPI)

review only

1  
2  
3  
4  
5  
6  
7  
8  
9  
10  
11  
12  
13  
14  
15  
16  
17  
18  
19  
20  
21  
22  
23  
24  
25  
26  
27  
28  
29  
30  
31  
32  
33  
34  
35  
36  
37  
38  
39  
40  
41  
42  
43  
44  
45  
46  
47  
48  
49  
50  
51  
52  
53  
54  
55  
56  
57  
58  
59  
60

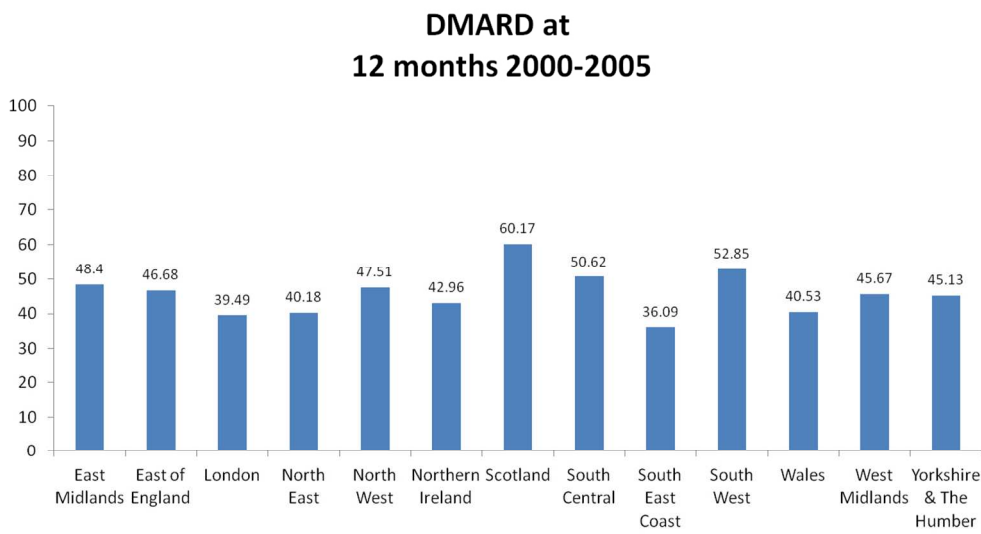

Figure 1b: Percentage of patients prescribed DMARDs at 12 months by region for the time period 2000-2005.  
228x125mm (150 x 150 DPI)

review only



1  
2  
3  
4  
5  
6  
7  
8  
9  
10  
11  
12  
13  
14  
15  
16  
17  
18  
19  
20  
21  
22  
23  
24  
25  
26  
27  
28  
29  
30  
31  
32  
33  
34  
35  
36  
37  
38  
39  
40  
41  
42  
43  
44  
45  
46  
47  
48  
49  
50  
51  
52  
53  
54  
55  
56  
57  
58  
59  
60

**DMARD at  
12 months 2006-2010**

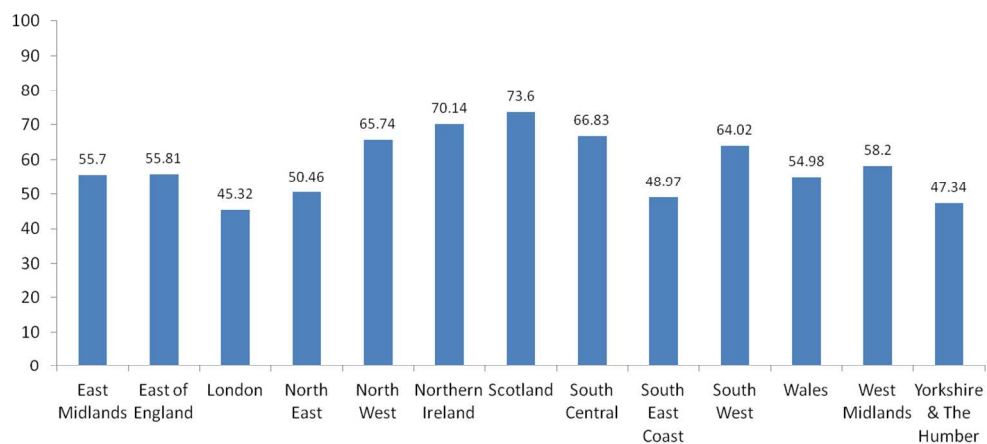

Figure 1c: Percentage of patients prescribed DMARDs at 12 months by region for the time period 2006–2010.  
228x125mm (150 x 150 DPI)

review only

1  
2  
3 *Appendix 1*

4 Each RA patient was matched by age, gender and practice to three patients without a record  
5 of inflammatory disease such as RA, juvenile arthritis, ankylosing spondylitis, enteropathic  
6 arthritis, reactive arthritis, inflammatory arthritis [seronegative], systemic lupus  
7 erythematosus [SLE], Sjogren's syndrome, mixed connective tissue disease [MCTD],  
8 polymyositis/dermatomyositis, scleroderma, polymyalgia rheumatica, giant cell arteritis,  
9 vasculitis [Wegeners], microscopic polyangiitis [MPA], Churg-strauss syndrome, polyarteritis  
10 nodosa [PAN], Takayasu arteritis, inflammatory bowel disease, sarcoidosis and psoriasis.  
11  
12  
13  
14  
15  
16  
17  
18  
19  
20  
21  
22  
23  
24  
25  
26  
27  
28  
29  
30  
31  
32  
33  
34  
35  
36  
37  
38  
39  
40  
41  
42  
43  
44  
45  
46  
47  
48  
49  
50  
51  
52  
53  
54  
55  
56  
57  
58  
59  
60

Appendix 2: Medications usage by region and by time period

| Region          | Time period     | No. of patients diagnosed | No. of patients prescribed DMARD at 3 months (%) | No. of patients prescribed DMARD at 6 months (%) | No. of patients prescribed DMARD at 12 months (%) | No. of patients prescribed methotrexate at 3 months (%) | No. of patients prescribed methotrexate at 6 months (%) | No. of patients prescribed methotrexate at 12 months (%) | No. of patients prescribed combination DMARDs at 3 months (%) | No. of patients prescribed combination DMARDs at 6 months (%) | No. of patients prescribed combination DMARDs at 12 months (%) |
|-----------------|-----------------|---------------------------|--------------------------------------------------|--------------------------------------------------|---------------------------------------------------|---------------------------------------------------------|---------------------------------------------------------|----------------------------------------------------------|---------------------------------------------------------------|---------------------------------------------------------------|----------------------------------------------------------------|
| East Midlands   | 1995_1999       | 197                       | 22 (11.17%)                                      | 31 (15.74%)                                      | 38 (19.29%)                                       | 1 (0.51%)                                               | 2 (1.02%)                                               | 7 (3.55%)                                                | . (%)                                                         | . (%)                                                         | . (%)                                                          |
|                 | 2000_2005       | 219                       | 57 (26.03%)                                      | 84 (38.36%)                                      | 106 (48.40%)                                      | 20 (9.13%)                                              | 44 (20.09%)                                             | 58 (26.48%)                                              | . (%)                                                         | . (%)                                                         | 4 (1.83%)                                                      |
|                 | 2006_April 2010 | 149                       | 63 (42.28%)                                      | 75 (50.34%)                                      | 83 (55.70%)                                       | 27 (18.12%)                                             | 38 (25.50%)                                             | 49 (32.89%)                                              | . (%)                                                         | 4 (2.68%)                                                     | 7 (4.70%)                                                      |
| East of England | 1995_1999       | 236                       | 68 (28.81%)                                      | 92 (38.98%)                                      | 108 (45.76%)                                      | 18 (7.63%)                                              | 22 (9.32%)                                              | 31 (13.14%)                                              | . (%)                                                         | . (%)                                                         | 2 (0.85%)                                                      |
|                 | 2000_2005       | 512                       | 157 (30.66%)                                     | 204 (39.84%)                                     | 239 (46.68%)                                      | 64 (12.50%)                                             | 85 (16.60%)                                             | 113 (22.07%)                                             | 2 (0.39%)                                                     | 2 (0.39%)                                                     | 16 (3.13%)                                                     |
|                 | 2006_April 2010 | 353                       | 143 (40.51%)                                     | 178 (50.42%)                                     | 197 (55.81%)                                      | 86 (24.36%)                                             | 111 (31.44%)                                            | 129 (36.54%)                                             | 13 (3.68%)                                                    | 16 (4.53%)                                                    | 23 (6.52%)                                                     |
| London          | 1995_1999       | 154                       | 33 (21.43%)                                      | 44 (28.57%)                                      | 55 (35.71%)                                       | 11 (7.14%)                                              | 14 (9.09%)                                              | 18 (11.69%)                                              | 1 (0.65%)                                                     | 1 (0.65%)                                                     | 1 (0.65%)                                                      |
|                 | 2000_2005       | 314                       | 80 (25.48%)                                      | 102 (32.48%)                                     | 124 (39.49%)                                      | 43 (13.69%)                                             | 60 (19.11%)                                             | 76 (24.20%)                                              | 1 (0.32%)                                                     | 3 (0.96%)                                                     | 7 (2.23%)                                                      |
|                 | 2006_April 2010 | 331                       | 91 (27.49%)                                      | 123 (37.16%)                                     | 150 (45.32%)                                      | 65 (19.64%)                                             | 91 (27.49%)                                             | 116 (35.05%)                                             | 9 (2.72%)                                                     | 15 (4.53%)                                                    | 26 (7.85%)                                                     |
| North East      | 1995_1999       | 39                        | 9 (23.08%)                                       | 12 (30.77%)                                      | 17 (43.59%)                                       | 1 (2.56%)                                               | 2 (5.13%)                                               | 5 (12.82%)                                               | . (%)                                                         | . (%)                                                         | . (%)                                                          |
|                 | 2000_2005       | 112                       | 28 (25.00%)                                      | 41 (36.61%)                                      | 45 (40.18%)                                       | 6 (5.36%)                                               | 13 (11.61%)                                             | 18 (16.07%)                                              | . (%)                                                         | . (%)                                                         | 1 (0.89%)                                                      |
|                 | 2006_April 2010 | 109                       | 30 (27.52%)                                      | 43 (39.45%)                                      | 55 (50.46%)                                       | 17 (15.60%)                                             | 25 (22.94%)                                             | 35 (32.11%)                                              | 1 (0.92%)                                                     | 1 (0.92%)                                                     | 7 (6.42%)                                                      |

| Region           | Time period     | No. of patients diagnosed | No. of patients prescribed DMARD at 3 months (%) | No. of patients prescribed DMARD at 6 months (%) | No. of patients prescribed DMARD at 12 months (%) | No. of patients prescribed methotrexate at 3 months (%) | No. of patients prescribed methotrexate at 6 months (%) | No. of patients prescribed methotrexate at 12 months (%) | No. of patients prescribed combination DMARDs at 3 months (%) | No. of patients prescribed combination DMARDs at 6 months (%) | No. of patients prescribed combination DMARDs at 12 months (%) |
|------------------|-----------------|---------------------------|--------------------------------------------------|--------------------------------------------------|---------------------------------------------------|---------------------------------------------------------|---------------------------------------------------------|----------------------------------------------------------|---------------------------------------------------------------|---------------------------------------------------------------|----------------------------------------------------------------|
| North West       | 1995_1999       | 284                       | 70 (24.65%)                                      | 96 (33.80%)                                      | 111 (39.08%)                                      | 21 (7.39%)                                              | 28 (9.86%)                                              | 34 (11.97%)                                              | . (.%)                                                        | . (.%)                                                        | 1 (0.35%)                                                      |
|                  | 2000_2005       | 583                       | 215 (36.88%)                                     | 253 (43.40%)                                     | 277 (47.51%)                                      | 85 (14.58%)                                             | 111 (19.04%)                                            | 135 (23.16%)                                             | 8 (1.37%)                                                     | 11 (1.89%)                                                    | 23 (3.95%)                                                     |
|                  | 2006_April 2010 | 470                       | 247 (52.55%)                                     | 286 (60.85%)                                     | 309 (65.74%)                                      | 151 (32.13%)                                            | 178 (37.87%)                                            | 201 (42.77%)                                             | 28 (5.96%)                                                    | 44 (9.36%)                                                    | 60 (12.77%)                                                    |
| Northern Ireland | 1995_1999       | 53                        | 22 (41.51%)                                      | 24 (45.28%)                                      | 26 (49.06%)                                       | 4 (7.55%)                                               | 5 (9.43%)                                               | 6 (11.32%)                                               | 1 (1.89%)                                                     | 2 (3.77%)                                                     | 4 (7.55%)                                                      |
|                  | 2000_2005       | 135                       | 42 (31.11%)                                      | 53 (39.26%)                                      | 58 (42.96%)                                       | 21 (15.56%)                                             | 28 (20.74%)                                             | 38 (28.15%)                                              | 1 (0.74%)                                                     | 2 (1.48%)                                                     | 5 (3.70%)                                                      |
|                  | 2006_April 2010 | 144                       | 84 (58.33%)                                      | 97 (67.36%)                                      | 101 (70.14%)                                      | 69 (47.92%)                                             | 80 (55.56%)                                             | 87 (60.42%)                                              | 6 (4.17%)                                                     | 6 (4.17%)                                                     | 9 (6.25%)                                                      |
| Scotland         | 1995_1999       | 59                        | 22 (37.29%)                                      | 25 (42.37%)                                      | 27 (45.76%)                                       | 2 (3.39%)                                               | 4 (6.78%)                                               | 5 (8.47%)                                                | . (.%)                                                        | . (.%)                                                        | . (.%)                                                         |
|                  | 2000_2005       | 231                       | 101 (43.72%)                                     | 126 (54.55%)                                     | 139 (60.17%)                                      | 16 (6.93%)                                              | 18 (7.79%)                                              | 30 (12.99%)                                              | 2 (0.87%)                                                     | 3 (1.30%)                                                     | 7 (3.03%)                                                      |
|                  | 2006_April 2010 | 322                       | 206 (63.98%)                                     | 228 (70.81%)                                     | 237 (73.60%)                                      | 75 (23.29%)                                             | 94 (29.19%)                                             | 112 (34.78%)                                             | 14 (4.35%)                                                    | 22 (6.83%)                                                    | 33 (10.25%)                                                    |
| South Central    | 1995_1999       | 114                       | 32 (28.07%)                                      | 37 (32.46%)                                      | 40 (35.09%)                                       | 12 (10.53%)                                             | 13 (11.40%)                                             | 18 (15.79%)                                              | . (.%)                                                        | 1 (0.88%)                                                     | 1 (0.88%)                                                      |
|                  | 2000_2005       | 324                       | 123 (37.96%)                                     | 145 (44.75%)                                     | 164 (50.62%)                                      | 69 (21.30%)                                             | 90 (27.78%)                                             | 111 (34.26%)                                             | 11 (3.40%)                                                    | 18 (5.56%)                                                    | 35 (10.80%)                                                    |
|                  | 2006_April 2010 | 401                       | 215 (53.62%)                                     | 253 (63.09%)                                     | 268 (66.83%)                                      | 163 (40.65%)                                            | 192 (47.88%)                                            | 207 (51.62%)                                             | 33 (8.23%)                                                    | 52 (12.97%)                                                   | 67 (16.71%)                                                    |

| Region                 | Time period     | No. of patients diagnosed | No. of patients prescribed DMARD at 3 months (%) | No. of patients prescribed DMARD at 6 months (%) | No. of patients prescribed DMARD at 12 months (%) | No. of patients prescribed methotrexate at 3 months (%) | No. of patients prescribed methotrexate at 6 months (%) | No. of patients prescribed methotrexate at 12 months (%) | No. of patients prescribed combination DMARDs at 3 months (%) | No. of patients prescribed combination DMARDs at 6 months (%) | No. of patients prescribed combination DMARDs at 12 months (%) |
|------------------------|-----------------|---------------------------|--------------------------------------------------|--------------------------------------------------|---------------------------------------------------|---------------------------------------------------------|---------------------------------------------------------|----------------------------------------------------------|---------------------------------------------------------------|---------------------------------------------------------------|----------------------------------------------------------------|
| South East Coast       | 1995_1999       | 115                       | 20 (17.39%)                                      | 29 (25.22%)                                      | 40 (34.78%)                                       | 6 (5.22%)                                               | 10 (8.70%)                                              | 17 (14.78%)                                              | . (%)                                                         | . (%)                                                         | . (%)                                                          |
|                        | 2000_2005       | 327                       | 73 (22.32%)                                      | 96 (29.36%)                                      | 118 (36.09%)                                      | 48 (14.68%)                                             | 63 (19.27%)                                             | 83 (25.38%)                                              | 2 (0.61%)                                                     | 2 (0.61%)                                                     | 6 (1.83%)                                                      |
|                        | 2006_April 2010 | 290                       | 101 (34.83%)                                     | 130 (44.83%)                                     | 142 (48.97%)                                      | 72 (24.83%)                                             | 95 (32.76%)                                             | 104 (35.86%)                                             | 7 (2.41%)                                                     | 9 (3.10%)                                                     | 16 (5.52%)                                                     |
| South West             | 1995_1999       | 200                       | 51 (25.50%)                                      | 66 (33.00%)                                      | 79 (39.50%)                                       | 13 (6.50%)                                              | 20 (10.00%)                                             | 26 (13.00%)                                              | 1 (0.50%)                                                     | 1 (0.50%)                                                     | 5 (2.50%)                                                      |
|                        | 2000_2005       | 316                       | 133 (42.09%)                                     | 149 (47.15%)                                     | 167 (52.85%)                                      | 55 (17.41%)                                             | 63 (19.94%)                                             | 90 (28.48%)                                              | 2 (0.63%)                                                     | 2 (0.63%)                                                     | 14 (4.43%)                                                     |
|                        | 2006_April 2010 | 378                       | 180 (47.62%)                                     | 212 (56.08%)                                     | 242 (64.02%)                                      | 110 (29.10%)                                            | 139 (36.77%)                                            | 164 (43.39%)                                             | 11 (2.91%)                                                    | 21 (5.56%)                                                    | 30 (7.94%)                                                     |
| Wales                  | 1995_1999       | 169                       | 46 (27.22%)                                      | 55 (32.54%)                                      | 56 (33.14%)                                       | 5 (2.96%)                                               | 12 (7.10%)                                              | 17 (10.06%)                                              | . (%)                                                         | . (%)                                                         | 1 (0.59%)                                                      |
|                        | 2000_2005       | 338                       | 92 (27.22%)                                      | 112 (33.14%)                                     | 137 (40.53%)                                      | 28 (8.28%)                                              | 42 (12.43%)                                             | 53 (15.68%)                                              | . (%)                                                         | 1 (0.30%)                                                     | 2 (0.59%)                                                      |
|                        | 2006_April 2010 | 271                       | 112 (41.33%)                                     | 136 (50.18%)                                     | 149 (54.98%)                                      | 69 (25.46%)                                             | 88 (32.47%)                                             | 105 (38.75%)                                             | 2 (0.74%)                                                     | 4 (1.48%)                                                     | 13 (4.80%)                                                     |
| West Midlands          | 1995_1999       | 152                       | 40 (26.32%)                                      | 50 (32.89%)                                      | 61 (40.13%)                                       | 2 (1.32%)                                               | 5 (3.29%)                                               | 12 (7.89%)                                               | . (%)                                                         | 2 (1.32%)                                                     | 3 (1.97%)                                                      |
|                        | 2000_2005       | 497                       | 140 (28.17%)                                     | 201 (40.44%)                                     | 227 (45.67%)                                      | 43 (8.65%)                                              | 82 (16.50%)                                             | 102 (20.52%)                                             | . (%)                                                         | . (%)                                                         | 6 (1.21%)                                                      |
|                        | 2006_April 2010 | 366                       | 147 (40.16%)                                     | 185 (50.55%)                                     | 213 (58.20%)                                      | 89 (24.32%)                                             | 123 (33.61%)                                            | 146 (39.89%)                                             | 8 (2.19%)                                                     | 15 (4.10%)                                                    | 29 (7.92%)                                                     |
| Yorkshire & The Humber | 1995_1999       | 156                       | 33 (21.15%)                                      | 47 (30.13%)                                      | 54 (34.62%)                                       | 7 (4.49%)                                               | 12 (7.69%)                                              | 16 (10.26%)                                              | . (%)                                                         | . (%)                                                         | . (%)                                                          |
|                        | 2000_2005       | 277                       | 90 (32.49%)                                      | 107 (38.63%)                                     | 125 (45.13%)                                      | 37 (13.36%)                                             | 49 (17.69%)                                             | 67 (24.19%)                                              | 2 (0.72%)                                                     | 7 (2.53%)                                                     | 13 (4.69%)                                                     |
|                        | 2006_April 2010 | 169                       | 50 (29.59%)                                      | 65 (38.46%)                                      | 80 (47.34%)                                       | 33 (19.53%)                                             | 42 (24.85%)                                             | 58 (34.32%)                                              | 1 (0.59%)                                                     | 2 (1.18%)                                                     | 5 (2.96%)                                                      |

Appendix 3: Baseline characteristics for the incident RA patients (N=15,259)

| Characteristic                                        | Incident RA Patients<br>(N=15,259) | Matched Controls<br>(N=45,777) | Crude Odds Ratio<br>(95% CI) |
|-------------------------------------------------------|------------------------------------|--------------------------------|------------------------------|
| Age 18–29 years                                       | 418 (2.7%)                         | 1,254 (2.7%)                   | *                            |
| Age 30–39 years                                       | 1,139 (7.5%)                       | 3,417 (7.5%)                   | *                            |
| Age 40–49 years                                       | 2,035 (13.3%)                      | 6,105 (13.3%)                  | *                            |
| Age 50–59 years                                       | 3,387 (22.2%)                      | 10,161 (22.2%)                 | *                            |
| Age 60–69 years                                       | 3,513 (23.0%)                      | 10,539 (23.0%)                 | *                            |
| Age 70–79 years                                       | 3,136 (20.6%)                      | 9,408 (20.6%)                  | *                            |
| Age 80+ years                                         | 1,631 (10.7%)                      | 4,893 (10.7%)                  | *                            |
| Female gender (%)                                     | 10,565 (69.2%)                     | 31,695 (69.2%)                 | *                            |
| Year of diagnosis:                                    |                                    |                                |                              |
| 1995                                                  | 589 (3.9%)                         | 1,767 (3.9%)                   | *                            |
| 1996                                                  | 563 (3.7%)                         | 1,689 (3.7%)                   | *                            |
| 1997                                                  | 659 (4.3%)                         | 1,977 (4.3%)                   | *                            |
| 1998                                                  | 709 (4.6%)                         | 2,127 (4.6%)                   | *                            |
| 1999                                                  | 780 (5.1%)                         | 2,340 (5.1%)                   | *                            |
| 2000                                                  | 981 (6.4%)                         | 2,943 (6.4%)                   | *                            |
| 2001                                                  | 1,171 (7.7%)                       | 3,513 (7.7%)                   | *                            |
| 2002                                                  | 1,321 (8.7%)                       | 3,963 (8.7%)                   | *                            |
| 2003                                                  | 1,308 (8.6%)                       | 3,924 (8.6%)                   | *                            |
| 2004                                                  | 1,306 (8.6%)                       | 3,918 (8.6%)                   | *                            |
| 2005                                                  | 1,204 (7.9%)                       | 3,612 (7.9%)                   | *                            |
| 2006                                                  | 1,195 (7.8%)                       | 3,585 (7.8%)                   | *                            |
| 2007                                                  | 1,113 (7.3%)                       | 3,339 (7.3%)                   | *                            |
| 2008                                                  | 1,068 (7.0%)                       | 3,204 (7.0%)                   | *                            |
| 2009                                                  | 1,098 (7.2%)                       | 3,294 (7.2%)                   | *                            |
| 2010                                                  | 194 (1.3%)                         | 582 (1.3%)                     | *                            |
| Length of follow-up<br>(mean, years)                  | 5.2                                | 4.9                            | *                            |
| Smoking status <sup>1</sup>                           |                                    |                                |                              |
| Non smoker (%)                                        | 6,453 (42.3%)                      | 22,052 (48.2%)                 | Reference                    |
| Ex smoker (%)                                         | 3,747 (24.6%)                      | 9,230 (20.2%)                  | 1.45 (1.38 - 1.53)           |
| Smoker (%)                                            | 3,798 (24.9%)                      | 8,862 (19.4%)                  | 1.51 (1.43 - 1.58)           |
| History of a presenting symptom<br>(any) <sup>2</sup> | 10,091 (66.1%)                     | 15,015 (32.8%)                 | 4.99 (4.77 - 5.22)           |
| Joint pain (%)                                        | 9,275 (60.8%)                      | 13,118 (28.7%)                 | 4.73 (4.53 - 4.95)           |
| Swollen tender joints (%)                             | 1,587 (10.4%)                      | 1,543 (3.4%)                   | 3.53 (3.27 - 3.81)           |
| Morning stiffness (%)                                 | 701 (4.6%)                         | 465 (1.0%)                     | 4.77 (4.22 - 5.38)           |
| Previous prescribing of <sup>3</sup> :                |                                    |                                |                              |
| Steroid injections                                    | 704 (4.6%)                         | 316 (0.7%)                     | 7.30 (6.36 - 8.39)           |
| Prednisolone                                          | 2,732 (17.9%)                      | 990 (2.2%)                     | 10.03 (9.26 - 10.86)         |
| NSAIDs                                                | 10,698 (70.1%)                     | 10,305 (22.5%)                 | 8.95 (8.54 - 9.38)           |
| Analgesics/ opioids                                   | 1,801 (11.8%)                      | 1,275 (2.8%)                   | 4.84 (4.48 - 5.23)           |
| H2 antagonists and PPIs                               | 3,971 (26.0%)                      | 5,302 (11.6%)                  | 2.89 (2.75 - 3.03)           |
| Statins                                               | 1,847 (12.1%)                      | 5,348 (11.7%)                  | 1.05 (0.99 - 1.12)           |
| Aspirin                                               | 1,975 (12.9%)                      | 5,726 (12.5%)                  | 1.05 (0.99 - 1.11)           |
| Antihypertensives                                     | 4,581 (30.0%)                      | 12,573 (27.5%)                 | 1.16 (1.11 - 1.22)           |
| Diabetic medications                                  | 745 (4.9%)                         | 2,013 (4.4%)                   | 1.12 (1.03 - 1.22)           |

<sup>1</sup>Patients were matched on this variable.

<sup>2</sup>Smoking status not known in 1,261 (8.3%) and 5,633 (12.3%) of RA patients and matched controls, respectively.

<sup>3</sup>Medical records were analysed in the 5 years before index date.

<sup>3</sup>Prescriptions were analysed in the six months before index date.

Appendix 4: Incidence rates and point prevalence of RA in the GPRD 2009

| Region                 | Person years at risk (years) | Incident RA cases 2009 | Incidence rate per 100,000 persons (30/06/09) | GPRD Population 2009 | RA Cases 2009 | Point Prevalence per 100,000 persons (30/06/09) |
|------------------------|------------------------------|------------------------|-----------------------------------------------|----------------------|---------------|-------------------------------------------------|
| North East             | 85016.28                     | 34                     | 0.400                                         | 84831                | 491           | 5.788                                           |
| North West             | 534355.5                     | 146                    | 0.273                                         | 544693               | 2,930         | 5.379                                           |
| Yorkshire & The Humber | 123289.3                     | 34                     | 0.276                                         | 123910               | 770           | 6.214                                           |
| East Midlands          | 123771.1                     | 31                     | 0.250                                         | 130367               | 781           | 5.991                                           |
| West Midlands          | 363201.7                     | 111                    | 0.306                                         | 374308               | 2,074         | 5.541                                           |
| East of England        | 377678                       | 96                     | 0.254                                         | 389617               | 2,041         | 5.238                                           |
| South West             | 349426.3                     | 125                    | 0.358                                         | 354863               | 1,918         | 5.405                                           |
| South Central          | 474538                       | 106                    | 0.223                                         | 483299               | 2,250         | 4.656                                           |
| London                 | 514153.7                     | 113                    | 0.220                                         | 519717               | 1,877         | 3.612                                           |
| South East Coast       | 381501.3                     | 89                     | 0.233                                         | 387344               | 1,718         | 4.435                                           |
| Northern Ireland       | 121126.8                     | 35                     | 0.289                                         | 124176               | 725           | 5.838                                           |
| Scotland               | 339703.9                     | 97                     | 0.286                                         | 343287               | 1,676         | 4.882                                           |
| Wales                  | 331040.5                     | 81                     | 0.245                                         | 338133               | 1,787         | 5.285                                           |

STROBE Statement—Checklist of items that should be included in reports of *cohort studies*

|                              | Item No | Recommendation                                                                                                                                                                                                                                                                                                                                    |
|------------------------------|---------|---------------------------------------------------------------------------------------------------------------------------------------------------------------------------------------------------------------------------------------------------------------------------------------------------------------------------------------------------|
| <b>Title and abstract</b>    | 1       | (a) Indicate the study's design with a commonly used term in the title or the abstract<br><b>Done – page 1 and 2 of PDF proof</b>                                                                                                                                                                                                                 |
|                              |         | (b) Provide in the abstract an informative and balanced summary of what was done and what was found<br><b>Done – page 2 of PDF proof</b>                                                                                                                                                                                                          |
| <b>Introduction</b>          |         |                                                                                                                                                                                                                                                                                                                                                   |
| Background/rationale         | 2       | Explain the scientific background and rationale for the investigation being reported<br><b>Done – page 3 of PDF proof</b>                                                                                                                                                                                                                         |
| Objectives                   | 3       | State specific objectives, including any prespecified hypotheses<br><b>Done – page 3 of PDF proof</b>                                                                                                                                                                                                                                             |
| <b>Methods</b>               |         |                                                                                                                                                                                                                                                                                                                                                   |
| Study design                 | 4       | Present key elements of study design early in the paper<br><b>Done – page 4 of PDF proof</b>                                                                                                                                                                                                                                                      |
| Setting                      | 5       | Describe the setting, locations, and relevant dates, including periods of recruitment, exposure, follow-up, and data collection<br><b>Done – page 4 of PDF proof</b>                                                                                                                                                                              |
| Participants                 | 6       | (a) Give the eligibility criteria, and the sources and methods of selection of participants. Describe methods of follow-up<br><b>Done – page 4 of PDF proof</b>                                                                                                                                                                                   |
|                              |         | (b) For matched studies, give matching criteria and number of exposed and unexposed<br><b>Done – page 4 of PDF proof</b>                                                                                                                                                                                                                          |
| Variables                    | 7       | Clearly define all outcomes, exposures, predictors, potential confounders, and effect modifiers. Give diagnostic criteria, if applicable<br><b>Done – page 4 of PDF proof</b>                                                                                                                                                                     |
| Data sources/<br>measurement | 8*      | For each variable of interest, give sources of data and details of methods of assessment (measurement). Describe comparability of assessment methods if there is more than one group<br><b>Done – page 4 of PDF proof</b>                                                                                                                         |
| Bias                         | 9       | Describe any efforts to address potential sources of bias<br><b>Done – page 8, 23 and 24 of PDF</b>                                                                                                                                                                                                                                               |
| Study size                   | 10      | Explain how the study size was arrived at ( <b>Not applicable – this is a descriptive study without definition of any a-priori hypothesis</b> )                                                                                                                                                                                                   |
| Quantitative variables       | 11      | Explain how quantitative variables were handled in the analyses. If applicable, describe which groupings were chosen and why ( <b>Not applicable</b> )                                                                                                                                                                                            |
| Statistical methods          | 12      | (a) Describe all statistical methods, including those used to control for confounding<br>(b) Describe any methods used to examine subgroups and interactions<br>(c) Explain how missing data were addressed<br>(d) If applicable, explain how loss to follow-up was addressed<br>(e) Describe any sensitivity analyses<br><b>(Not applicable)</b> |
| <b>Results</b>               |         |                                                                                                                                                                                                                                                                                                                                                   |
| Participants                 | 13*     | (a) Report numbers of individuals at each stage of study—eg numbers potentially eligible, examined for eligibility, confirmed eligible, included in the study, completing follow-up, and analysed                                                                                                                                                 |



|                          |     |                                                                                                                                                                                                                     |
|--------------------------|-----|---------------------------------------------------------------------------------------------------------------------------------------------------------------------------------------------------------------------|
|                          |     | <b>Done – page 5 and 23 of PDF proof</b>                                                                                                                                                                            |
|                          |     | (b) Give reasons for non-participation at each stage ( <b>Not applicable</b> )                                                                                                                                      |
|                          |     | (c) Consider use of a flow diagram ( <b>Not applicable</b> )                                                                                                                                                        |
| Descriptive data         | 14* | (a) Give characteristics of study participants (eg demographic, clinical, social) and information on exposures and potential confounders<br><b>Done – page 5 and 23 of PDF proof</b>                                |
|                          |     | (b) Indicate number of participants with missing data for each variable of interest ( <b>Not applicable</b> )                                                                                                       |
|                          |     | (c) Summarise follow-up time (eg, average and total amount)<br><b>Done – page 4 of PDF proof</b>                                                                                                                    |
| Outcome data             | 15* | Report numbers of outcome events or summary measures over time<br><b>Done – page 5 and 6 of PDF proof</b>                                                                                                           |
| Main results             | 16  | (a) Give unadjusted estimates and, if applicable, confounder-adjusted estimates and their precision (eg, 95% confidence interval). Make clear which confounders were adjusted for and why they were included        |
|                          |     | (b) Report category boundaries when continuous variables were categorized                                                                                                                                           |
|                          |     | (c) If relevant, consider translating estimates of relative risk into absolute risk for a meaningful time period ( <b>Not applicable</b> )                                                                          |
| Other analyses           | 17  | Report other analyses done—eg analyses of subgroups and interactions, and sensitivity analyses ( <b>Not applicable</b> )                                                                                            |
| <b>Discussion</b>        |     |                                                                                                                                                                                                                     |
| Key results              | 18  | Summarise key results with reference to study objectives<br><b>Done – pages 6, 7 and 8 of PDF proof</b>                                                                                                             |
| Limitations              | 19  | Discuss limitations of the study, taking into account sources of potential bias or imprecision. Discuss both direction and magnitude of any potential bias<br><b>Done – pages 8 and 9 of PDF proof</b>              |
| Interpretation           | 20  | Give a cautious overall interpretation of results considering objectives, limitations, multiplicity of analyses, results from similar studies, and other relevant evidence<br><b>Done – pages 6–10 of PDF proof</b> |
| Generalisability         | 21  | Discuss the generalisability (external validity) of the study results<br><b>Done – pages 6–10 of PDF proof</b>                                                                                                      |
| <b>Other information</b> |     |                                                                                                                                                                                                                     |
| Funding                  | 22  | Give the source of funding and the role of the funders for the present study and, if applicable, for the original study on which the present article is based<br><b>Done – page 11 of PDF proof</b>                 |

\*Give information separately for exposed and unexposed groups.

**Note:** An Explanation and Elaboration article discusses each checklist item and gives methodological background and published examples of transparent reporting. The STROBE checklist is best used in conjunction with this article (freely available on the Web sites of PLoS Medicine at <http://www.plosmedicine.org/>, Annals of Internal Medicine at <http://www.annals.org/>, and Epidemiology at <http://www.epidem.com/>). Information on the STROBE Initiative is available at <http://www.strobe-statement.org>.

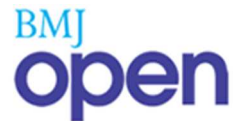

**Regional and temporal variation in the treatment of  
rheumatoid arthritis across the UK: a descriptive register-  
based cohort study**

|                                 |                                                                                                                                                                                                                                                                                                                                                                                                                               |
|---------------------------------|-------------------------------------------------------------------------------------------------------------------------------------------------------------------------------------------------------------------------------------------------------------------------------------------------------------------------------------------------------------------------------------------------------------------------------|
| Journal:                        | <i>BMJ Open</i>                                                                                                                                                                                                                                                                                                                                                                                                               |
| Manuscript ID:                  | bmjopen-2012-001603.R2                                                                                                                                                                                                                                                                                                                                                                                                        |
| Article Type:                   | Research                                                                                                                                                                                                                                                                                                                                                                                                                      |
| Date Submitted by the Author:   | 11-Sep-2012                                                                                                                                                                                                                                                                                                                                                                                                                   |
| Complete List of Authors:       | Edwards, Christopher; University Hospital Southampton NHS Foundation Trust, Rheumatology<br>Campbell, Jennifer; General Practice Research Database, Medicines and Healthcare products Regulatory Agency,<br>van Staa, Tjeerd; General Practice Research Database, Medicines and Healthcare products Regulatory Agency, ; Utrecht Institute for Pharmaceutical Sciences,<br>Arden, Nigel; Nuffield Department of Orthopaedics, |
| <b>Primary Subject Heading</b>: | Rheumatology                                                                                                                                                                                                                                                                                                                                                                                                                  |
| Secondary Subject Heading:      | General practice / Family practice, Pharmacology and therapeutics                                                                                                                                                                                                                                                                                                                                                             |
| Keywords:                       | Rheumatology < INTERNAL MEDICINE, PRIMARY CARE, RHEUMATOLOGY                                                                                                                                                                                                                                                                                                                                                                  |
|                                 |                                                                                                                                                                                                                                                                                                                                                                                                                               |

SCHOLARONE™  
Manuscripts

Only

1  
2  
3  
4  
5  
6  
7  
8  
9  
10  
11  
12  
13  
14  
15  
16  
17  
18  
19  
20  
21  
22  
23  
24  
25  
26  
27  
28  
29  
30  
31  
32  
33  
34  
35  
36  
37  
38  
39  
40  
41  
42  
43  
44  
45  
46  
47  
48  
49  
50  
51  
52  
53  
54  
55  
56  
57  
58  
59  
60

## Regional and temporal variation in the treatment of rheumatoid arthritis across the UK: a descriptive register-based cohort study

### Authors

Christopher J Edwards *consultant rheumatologist*<sup>1,2</sup>, Jennifer Campbell *research scientist*<sup>3</sup>, Tjeerd Van Staa *head of research*<sup>3,4</sup>, Nigel K Arden *professor of rheumatology*<sup>2,5</sup>.

<sup>1</sup>Department of Rheumatology, University Hospital Southampton NHS Foundation Trust, Southampton, United Kingdom, SO16 6YD; <sup>2</sup>University of Southampton, Southampton, United Kingdom SO16 6YD; <sup>3</sup>General Practice Research Database, Medicines and Healthcare products Regulatory Agency, London, United Kingdom SW1W 9SZ; <sup>4</sup>Utrecht Institute for Pharmaceutical Sciences, Utrecht University, Utrecht, the Netherlands; <sup>5</sup>Nuffield Department of Orthopaedics, Rheumatology and Musculoskeletal Sciences, University of Oxford, United Kingdom OX3 7HE.

Correspondence to: Christopher J Edwards [cedwards@soton.ac.uk](mailto:cedwards@soton.ac.uk)

## Abstract

**Objectives:** To describe current DMARD prescription in rheumatoid arthritis (RA) with reference to best practice and to identify temporal and regional trends in the UK

**Design:** Descriptive, register-based cohort study

**Participants:** Permanently registered patients aged  $\geq 18$  years with a recorded diagnosis of RA between 01/01/1995 and 31/03/2010 and matched controls. Participants with RA were identified through screening of all patients in the General Practice Research Database (GPRD) with a clinical or referral record for RA and at least one day of follow-up.

**Setting:** 639 general practices in the UK supplying data to the GPRD

**Main outcome measures:** Medication prescribing between 3 and 12 months of RA diagnosis by region and time period (1995–1999, 2000–2005, and 2006–April 2010).

**Results:** Of the 35,911 patients in the full RA cohort, 15,259 patients (42%) had incident RA. Analysis of prescribing in incident RA patients demonstrated that between 1995 (baseline) and 2010 there was a substantial increase in DMARD, and specifically methotrexate, prescribing across all regions with a less marked increase in combination DMARD prescribing. Taking 12-month prescribing as a snapshot: DMARD prescribing was 19–49% at baseline increasing to 45–74% by 2006–April 2010; methotrexate prescribing was 4–16% at baseline increasing to 32–60%; combination DMARD prescribing was 0–8% at baseline increasing to 3–17%. However there was marked regional variation in the proportion of RA patients receiving DMARD regardless of time period.

**Conclusions:** There has been a substantial increase in prescribing of DMARDs for RA since 1995; however regional variation persists across the UK with relative under-treatment, according to established best practice. Improved implementation of evidence-based best clinical practice to facilitate removal of treatment variation is warranted. This may occur as a result of the implementation of published national guidance.

**Key words:** *Rheumatoid arthritis, DMARDs, General Practice Research Database, regional variation.*

## Article summary

### Article focus:

- Over recent years there have been fundamental changes in the approach to treatment of rheumatoid arthritis (RA) with a move towards early and more aggressive treatment
- Disease-modifying anti-rheumatic drugs (DMARDs) are effective in the treatment of RA and their early use is recommended in national and international clinical guidelines and recommendations.
- We describe both temporal and regional trends in DMARD therapy for RA throughout the UK over a 15-year period and reveal whether the latest knowledge on how RA should be treated has been translated into actual clinical practice

### Key messages:

- There has been a substantial increase in DMARD prescription for RA and an increase in the proportion of patients prescribed DMARD earlier in the course of their disease between 1995 and 2010
- However, RA remains relatively under-treated according to best practice and published national guidelines, and regional variation persists
- There is a need to optimise dissemination and implementation of high-quality clinical guidelines and to monitor implementation.

### Strengths and limitations of this study:

- One of the strengths of the study was the size of the study population with 15,259 patients with incident RA and of the long-term follow-up of these patients (mean 5.5 years but up to 15.3 years for some patients). Another is the generalisability of the General Practice Research Database (GPRD) database from which our data was obtained.
- The coding of the diagnosis of RA is a potential limitation; however, GPRD has been validated in previous studies and in this study by the observation of similar demographics for DMARD versus non-DMARD users.

## Introduction

Rheumatoid arthritis (RA) is a chronic, systemic, autoimmune disease, the most common form of chronic joint inflammation [1], and is associated with substantial long-term morbidity, mortality and health-care costs [2]. A recent report from the National Audit Office (NAO) estimates that around 580,000 people have RA in England and that 26,000 patients are diagnosed with RA each year [3]. RA can have a profound effect on patients through the physical manifestations of the disease, associated complications and impact on health-related quality of life (HRQOL) [4]. Disease-modifying anti-rheumatic drugs (DMARDs), used either as monotherapy or in combination, can control disease activity, reduce joint erosions [5], improve quality of life [6] and also reduce the cardiovascular morbidity associated with RA [7].

Over recent years there have been fundamental changes in the approach to treatment of RA with the availability of newer therapies and a move towards early and more aggressive treatment [8]. A recent meta-analysis including data from 70 trials, demonstrates that aggressive treatment with combination DMARDs is able to reduce structural joint damage [9]. DMARDs have a critical role in the management of RA and are central to both European recommendations [8] and UK guidance [10]. Issued in February 2009, NICE clinical guidelines for the treatment of RA recommend a combination of DMARDs (including methotrexate and at least one other DMARD, plus short-term glucocorticoids) as first-line treatment ideally within 3 months of symptom onset for people with recently diagnosed active RA [10]. The NICE guidance serves as an example of best practice although its publication in 2009 preclude us from determining accurately whether its recommendations have been taken up in this study.

Much information regarding the use of DMARDs is from published experience within the tertiary care setting however it is unclear how well this reflects routine practice in secondary and primary care settings across the UK. Despite the demonstrated efficacy of DMARDs, data from over 34,000 primary care records collected between 1987 and 2002 indicate that only half of patients diagnosed with RA receive DMARD therapy [11]. The UK General Practice Research Database (GPRD) is an electronic database of primary care medical records. GPRD contains data on over 8% of the population and has data on over 11 million individuals (cumulative) with over 5 million currently active [11, 12]. The GPRD has been used in several studies and the validity of an RA diagnosis in GPRD appears to be high for patients with specific characteristics when using the American College of Rheumatology (ACR) diagnostic criteria as the standard [12, 13]. All patients in the UK will be seen by a primary care physician or general practitioner in addition to any secondary care physician needed for care of a specific illness. Although individuals with RA were recruited to the GPRD by a general practitioner the validation studies described show that a rheumatologist in secondary care will also have seen the vast majority of individuals [12]. The objectives of this study were to provide an updated view of current DMARD prescribing in RA with

1 reference to best practice, to describe both temporal and regional trends in DMARD therapy for RA  
2 throughout the UK over a 15-year period, and to assess whether the latest knowledge on how RA  
3 should be treated has been translated into actual clinical practice.  
4  
5  
6

## 7 **Methods**

### 8 *Data source*

9 We obtained data for this study from the GPRD which collates the computerized medical records of  
10 GPs. The data recorded in the GPRD include demographic information, prescription details, clinical  
11 events, preventive care provided, specialist referrals, hospital admissions, and major outcomes.  
12 The GPRD contains the complete anonymised patient medical records from GPs who use the  
13 system from In Practice Systems (a software package used for patient medical records) and who  
14 agree to adhere to "Recording Guidelines" that are subject to detailed quality control checks of  
15 data at both practice and individual patient level.  
16  
17  
18  
19  
20  
21  
22

### 23 *Study design and population*

24 We conducted a descriptive, cohort study in permanently registered patients aged 18 years and  
25 over with a recorded diagnosis of RA between 01/01/1995 and 31/03/2010. We identified our  
26 study population through screening of all patients in the GPRD (n=11,480,996); who had a clinical  
27 or referral record for RA (n=63,238); with a record on or after 01/01/1995 (n=45,057); where this  
28 record was on or after the start of follow up (latest of patient registration or practice up-to-standard  
29 [UTS] date) (n=36,567); who were aged at least 18 at this date (n=36,035); and who had at least  
30 one day of follow-up (n=35,911). We used the same Read codes as in the previous RA validation  
31 study [12].  
32  
33  
34  
35  
36  
37

38 The period of follow-up was from the date of first RA record up (i.e. index date) to the date of  
39 censoring (i.e. latest GPRD data collection, patient's transfer out of the practice, or patient's death,  
40 whichever date came first). The study population included patients with a record of RA prior to start  
41 of GPRD data collection (i.e., prevalent cases) and also RA patients with a first-ever record of RA  
42 at least 1 year after start of GPRD data collection (i.e. incident cases). Each RA patient was  
43 matched by age, gender and practice to three patients without a record of inflammatory disease  
44 (listed in Appendix 1).  
45  
46  
47  
48  
49

### 50 *Analysis of utilisation characteristics*

51 We conducted an analysis to describe the exposure characteristics of incident RA patients from  
52 index date. We measured the prevalence of use of different medications stratified by age at  
53 diagnosis (at date of first-ever record of RA), age at time of measurement, sex, calendar year and  
54 strategic health authority. We determined the prevalence of medication use by evaluating GP  
55 prescribing in the 6 months before the index date of the following DMARDS: methotrexate;  
56  
57  
58  
59  
60



1 sulfasalazine; hydroxychloroquine; gold (sodium aurothiomalate); auranofin; penicillamine;  
2  
3 leflunomide; azathioprine; ciclosporin; and cyclophosphamide. Of note, GPRD captures information  
4  
5 on all prescriptions issued both acute and repeat, along with dosage instructions.  
6  
7

## 8 **Results**

### 9 *Baseline characteristics*

10 The full cohort included both incident and prevalent RA cases and comprised a total of 35,911  
11 patients. RA patients and matched controls were well balanced in terms of age, gender and  
12 socioeconomic status. However, there was a higher prevalence of smokers and a lower prevalence  
13 of drinkers among RA patients. Of the 35,911 patients in the full RA cohort, a subgroup of 15,259  
14 patients (42%) had incident RA. With regard to treatment, there was a 10-fold increase in  
15 prescribing of prednisolone for incident RA patients versus matched controls and a 9-fold increase  
16 in prescribing of non-steroidal anti-inflammatory drugs (NSAIDs) in the 6 months prior to diagnosis.  
17  
18  
19  
20  
21  
22

### 23 *Prescription practice by region and time period for incident patients*

#### 24 *General trends*

25 The data was analysed to assess the proportion of incident RA patients prescribed either DMARD,  
26 methotrexate or combination DMARD within 3, 6 or 12 months of diagnosis according to  
27 geographic region and according to time period (1995–1999, 2000–2005, and 2006–April 2010)  
28 (Appendix 2). In general, the data indicate that across all regions and within each time period, the  
29 proportion of patients prescribed DMARDs including methotrexate increased between 3 months  
30 and 12 months. However, increases in the proportion of patients prescribed combination DMARDs  
31 were less marked with either no or little increase between 3–6 and 6–12 months but a modest  
32 overall increase between 3 and 12 months.  
33  
34  
35  
36  
37  
38  
39

#### 40 *Temporal change in medication prescribing*

41 In order to provide a snapshot of change in DMARD usage over time, the data was analysed to  
42 assess the proportion of patients prescribed either any DMARD, methotrexate or any combination  
43 of DMARDs within 12 months according to time period (1995–1999, 2000–2005, and 2006–April  
44 2010) (Table 1). There was a substantial increase in 12-month prescribing of DMARD (from 36.9%  
45 to 60.1%), methotrexate (from 11.6% to 40.7%), and combination DMARD (from 0.9% to 9.1%)  
46 over the 15-year time period. Analysis of regional data demonstrated an increase in the proportion  
47 of patients prescribed DMARDs at 12 months across all regions during the 15-year time period  
48 (Figure 1). At baseline (1995–1999) between 19.29% (East Midlands) and 49.06% (Northern  
49 Ireland) of patients were prescribed DMARDs at 12 months; by 2006–April 2010 the rate of  
50 prescribing had increased from between 45.32% (London) to 73.6% (Scotland). A general trend for  
51 increased prescription of DMARDs/methotrexate between 3–12 months was also evident across all  
52 regions. Of note, combination DMARDs tended to be prescribed after 3 months with increasing  
53  
54  
55  
56  
57  
58  
59  
60



1 prescription between 6 and 12 months and between 1995–April 2010 across all regions (Appendix  
2 2).

### 6 *Regional variation*

8 Analysis of data focusing on prescribing of DMARDs at 12 months demonstrates substantial  
9 regional variation in DMARD prescribing regardless of time period (Figure 1). Regional variation in  
10 DMARD prescribing at 12 months ranged from 19.29–49.06% between 1995–1999; from 36.09–  
11 60.17% between 2000–2005; and from 45.32–73.6% between 2006–April 2010. The regional  
12 difference in the proportion of patients prescribed DMARD at 12 months ranged from 24–30%  
13 within each time period. Prescribing patterns of methotrexate and combination DMARDs also  
14 varied from region to region regardless of time period (Appendix 2).  
15  
16  
17  
18  
19

### 20 *Time from diagnosis to treatment*

21 The data for incident patients with UTS data of five years was analysed to evaluate time from  
22 diagnosis to treatment with either DMARD and/or methotrexate. For 5,513 patients prescribed a  
23 DMARD, the median time from diagnosis to treatment was 50 days (interquartile range [IQR] 0–  
24 1,826); for 3,754 patients prescribed methotrexate, the median time from diagnosis to treatment  
25 was 119 days (IQR 0–1,826); while for 1,310 patients prescribed combination DMARD the median  
26 time from diagnosis to treatment was 560 days (IQR 0–1,826).  
27  
28  
29  
30  
31

## 32 **Discussion**

33 We have demonstrated that between 1995 and 2010 there was a substantial increase in DMARD,  
34 methotrexate and combination DMARD prescribing across all regions. In this 15-year period, 12-  
35 month prescribing of DMARD almost doubled rising from 36.9% to 60.1%; 12-month prescribing of  
36 methotrexate quadrupled from 11.6% to 40.7%; and 12-month prescribing of combination DMARD  
37 showed a ten-fold increase from 0.9% to 9.0%. However, some 40% of patients were not receiving  
38 DMARD at 12 months despite national clinical guidelines recommending this therapy within 3  
39 months of diagnosis [10] indicating a relative under-treatment of RA. In addition, the marked  
40 regional variation in the prescription of DMARDs within the UK persists and has not decreased with  
41 time. To our knowledge, this is the first time that data on the use of DMARDs over this time period  
42 has been examined in a large RA population in the UK.  
43  
44  
45  
46  
47  
48  
49

## 50 **Clinical implications**

51 Several studies indicate that appropriate and timely use of DMARDs and biologics for  
52 management of RA can improve outcomes such as mortality risk and HRQOL [14, 15, 16, 17].  
53 However previous studies indicate that many patients receive insufficient treatment [18] and that  
54 there is variation in practice in the management of RA [3]. Our current data confirm the significant  
55 regional variation both in the timing of DMARD or methotrexate therapy and in the proportion of  
56  
57  
58  
59  
60

1 patients diagnosed with RA receiving these therapies at specific time points. Based on the latest  
2 data from 2006–April 2010 for regions in England (i.e. excluding Wales, Scotland and Northern  
3 Ireland), the proportion of RA patients receiving DMARDs at 12 months between 2006–April 2010  
4 ranges from 45.32% (London) to 66.83% (South Central). In addition, the proportion of RA patients  
5 in England receiving methotrexate at 12 months in this latest time period ranges from 32.11%  
6 (North East) to 51.62% (South Central); at best two-thirds of RA patients in England are being  
7 prescribed DMARDs and approximately one-half of RA patients in England are being prescribed  
8 methotrexate by 12 months (Appendix 2).

14 The underlying reasons for this variation are not clear but could be due to several factors such as  
15 differences in RA health spend or differences in implementation and sharing of best practice. With  
16 the devolution of the NHS in 1999, differences in health services management and delivery exist  
17 between England, Scotland, Wales and Northern Ireland. Interestingly, our data indicate that  
18 Scotland and Northern Ireland have the highest proportion of RA patients prescribed DMARDs at  
19 12 months (73.6% and 70.14%, respectively) and Northern Ireland the highest proportion of  
20 patients prescribed methotrexate at 12 months (60.42%; 34.78% in Scotland). This may suggest  
21 that there are lessons to be learned from regions which demonstrate good practice, possibly  
22 through understanding the impact of different networks, interaction and communication and the  
23 impact of different health spend priorities. In addition, it would be interesting to examine if regions  
24 with more aggressive use of DMARDs may use more or less biological therapies. Of note, there is  
25 as yet no benchmark defining the proportion of RA patients who should be prescribed DMARDs.  
26 These drugs are not suitable for *all* RA patients for example those with contraindications and  
27 women trying to conceive. Therefore the ‘ideal’ would be less than 100% of patients and possibly  
28 around 80% seems a realistic estimate of the proportion of RA patients eligible for DMARD  
29 therapy.

34 Several reports emphasize the importance of early and appropriate intervention in RA to optimise  
35 patient outcomes [10, 19]. A meta-analysis assessing the long-term impact of early treatment on  
36 radiographic progression in RA which included 1,133 patients identified a critical period for the  
37 initiation of RA therapy, a ‘therapeutic window of opportunity’ early in the course of RA which was  
38 associated with durable benefit in radiographic progression for a period of up to 5 years. In this  
39 analysis, there was a 33% reduction in long-term progression rates in patients receiving early  
40 therapy for their disease compared with those treated later [20]. Importantly, suboptimal treatment  
41 can lead to joint damage necessitating surgery (with the associated resource implications), and to  
42 a higher mortality risk from cardiovascular disease, a risk which can be mitigated with appropriate  
43 and timely methotrexate treatment [7].

1  
2 In our study, median time from diagnosis to treatment with DMARD, methotrexate or combination  
3 DMARD was 50, 119, and 560 days, respectively. This compares with NICE clinical guideline  
4 recommendations for combination DMARD treatment (including methotrexate) to be used as first-  
5 line therapy within 3 months of the onset of persistent symptoms [10]. Our findings indicate that RA  
6 patients who do receive methotrexate have it prescribed a median 4 months after diagnosis. Prior  
7 to diagnosis many patients in our study were already receiving treatment or therapies that may  
8 ameliorate the symptoms of RA (Appendix 3): this may further delay treatment as RA symptoms  
9 are masked though damage continues and can impact outcomes. Given the likely delay between  
10 symptom onset and diagnosis, the time from symptom onset to methotrexate is probably greater  
11 than 4 months. Furthermore it should be noted that during the most recent time period (2006–April  
12 2010) by 12 months at best only half of diagnosed RA patients were prescribed methotrexate  
13 (51.62%; South Central region).  
14  
15  
16  
17  
18  
19

20  
21 Effective treatments for RA are available [8, 21] however, the results from our study demonstrate  
22 that RA is often suboptimally treated and that regional variation in the management of RA persists  
23 after almost two years of guidance being available. Despite a recommendation for first-line  
24 treatment with combination DMARDs, fewer than 1 in 10 RA patients in the UK receive this  
25 therapy. Although there has been an encouraging increase in DMARD and methotrexate  
26 prescribing it is too early for us to conclude with any accuracy whether the more recently published  
27 NICE and EULAR guidelines have influenced DMARD prescribing in the UK. Recently published  
28 data indicate that the challenge of RA guideline implementation is not restricted to the UK.  
29 Assessment of prescribing practices in a US cohort of RA patients before and after publication of  
30 American College of Rheumatology (ACR) treatment recommendations indicates that at best only  
31 around 50% of RA patients with active disease receive care consistent with the current  
32 recommendations [22].  
33  
34  
35  
36  
37  
38  
39

40  
41 The longer term impact of our findings should be considered including the cost of surgical  
42 intervention when RA is suboptimally controlled resulting in joint damage. Policymakers should be  
43 aware of the persistence of variation and assess how best to minimise inequalities in RA care. A  
44 future challenge is how best to disseminate and embed new standards of care into routine clinical  
45 practice especially for chronic diseases such as RA where treatment is undertaken by a range of  
46 healthcare professionals in different settings. This is likely to be ever more relevant as the care of  
47 patients with chronic disease increasingly is being transferred into the community setting.  
48 We conclude that there is a need to optimise dissemination and implementation of high-quality  
49 clinical guidelines, that systems and processes for monitoring implementation should be  
50 developed, and that relevant indicators should be incorporated to ensure that guidelines are  
51 followed. Furthermore, accurate information on current prescribing in RA is vital to inform the  
52 development of the planned NICE Quality Standard for RA.  
53  
54  
55  
56  
57  
58  
59  
60

### Strengths and weaknesses

One of the strengths of our study was the size of the study population with 15,259 patients with incident RA and of the long-term follow-up of these patients (mean 5.5 years but up to 15.3 years for some patients). Another is the generalisability of the GPRD database from which our data was obtained. The GPRD is representative of patients and practices throughout the UK [23], and encompasses patients treated in primary, secondary and tertiary care. The regional variation observed in prescribing of DMARDs could be due to regional differences in the incidence of RA. However, data on age of diagnosis over the duration of the study (Appendix 3) together with data (for 2009) on point prevalence and incidence rates for RA in the GPRD (Appendix 4) were as expected, indicating robustness of the data.

The coding of the diagnosis of RA is a potential limitation. However, GPRD has been validated in previous studies [12] and again in this study by the observation of similar demographics for DMARD versus non-DMARD users. Furthermore, practices are monitored for the accuracy and completeness of data they submit to the GPRD data by running set queries on the data and as they are reimbursed by GPRD, penalties can be levied against practices that routinely fail to meet recording standards [23]. It is also unlikely that our results are compromised by healthcare seeking behaviour given the similar rates of prescribing of non-antirheumatic medication (statins, aspirin, antihypertensives and diabetic medications) in the full RA cohort versus matched controls (Appendix 3). There may be temporal and regional variation in when GPs start to prescribe DMARDs. In some areas the GP initiates the first DMARD prescription on the advice of the rheumatologist; in other areas the hospital rheumatologist may initiate prescribing for a period of time. However by 12 months it seems likely that most prescribing will be via the GP. This is supported by data from the IMS British Pharmaceutical Index (BPI) / IMS Hospital Pharmacy Index (HPA) which demonstrates that across all indications, over 90% of all DMARDs prescribing is carried out within primary care; for methotrexate, around 75–80% of all prescribing is carried out in the primary care setting [24]. We have recently performed a survey of primary care trust (PCTs) in England that suggests more than 90% of methotrexate prescribing is ultimately performed in primary care with 77% by 6 months (personal communication submitted for publication). Prescribing data for the use of DMARDs appears to be strong in the GPRD. However, as biological therapies are not usually prescribed by primary care we are unable to comment on their use as the GPRD only contains very limited information on their prescribing.

### Conclusions

1 In summary, there has been a substantial improvement in the treatment of RA across the UK over  
2 the 15-year period from 1995–2010 with increasing use of DMARDs which currently represent best  
3 clinical practice. Despite this improvement, RA remains under-treated according to clinical  
4 recommendations and guidelines in the UK [10] and elsewhere [25]. In addition regional variation  
5 in DMARD and methotrexate prescribing persists across the UK.  
6  
7

8 Improvement in RA treatment is needed UK-wide: identification and assessment of models of RA  
9 treatment that demonstrate implementation of evidence-based best clinical practice would  
10 minimise variation, facilitate nationally a uniform approach to RA treatment, to both improve patient  
11 outcomes and optimise resource use.  
12  
13  
14  
15  
16  
17  
18  
19  
20  
21  
22  
23  
24  
25  
26  
27  
28  
29  
30  
31  
32  
33  
34  
35  
36  
37  
38  
39  
40  
41  
42  
43  
44  
45  
46  
47  
48  
49  
50  
51  
52  
53  
54  
55  
56  
57  
58  
59  
60

1  
2  
3  
4  
5  
6  
7  
8  
9  
10  
11  
12  
13  
14  
15  
16  
17  
18  
19  
20  
21  
22  
23  
24  
25  
26  
27  
28  
29  
30  
31  
32  
33  
34  
35  
36  
37  
38  
39  
40  
41  
42  
43  
44  
45  
46  
47  
48  
49  
50  
51  
52  
53  
54  
55  
56  
57  
58  
59  
60

**Acknowledgements** We thank Claire Housden and Kirsty Roberts (Roche Products Ltd) for procuring project funding and Ify Sargeant (ismedica Ltd) for medical writing support, funded by Roche Products Ltd.

**Contributors:** CJE, NKA, TvS and JC made primary contributions to study design, data collection, data analysis, interpretation of results, and writing the manuscript. All authors contributed to the interpretation of results and critical revision of the manuscript and approved the final manuscript. All authors had full access to all of the data (including statistical reports and tables) in the study and can take responsibility for the integrity of the data and the accuracy of the data analysis. CJE is the guarantor.

**Funding:** This work was supported by Roche-Chugai who funded data generation and analysis by GPRD. Funding sources had no influence on the study design, interpretation of results, or decision to submit the article.

**Competing interests:** All authors have completed the Unified Competing Interest form at [www.icmje.org/coi\\_disclosure.pdf](http://www.icmje.org/coi_disclosure.pdf) (available on request from the corresponding author) and declare: financial support for the submitted work from Roche-Chugai; CJE has acted as speaker for and received research funding from Roche, UCB, Abbott, GSK and Pfizer; NKA has acted as speaker for and received research funding from Roche, Merck, Q-Med, NICOX, Flexion, Servier, GSK, Amgen and Lilly; GPRD (JC and TvS) has received funding from the MHRA, Wellcome Trust, Medical Research Council, NIHR Health Technology Assessment programme, Innovative Medicine Initiative, UK Department of Health, Technology Strategy Board, Seventh Framework Programme EU, various universities, contract research organisations and pharmaceutical companies. The department of Pharmacoepidemiology & Pharmacotherapy, Utrecht Institute for Pharmaceutical Sciences (TvS) has received unrestricted funding for pharmacoepidemiological research from GlaxoSmithKline, Novo Nordisk, the private-public funded Top Institute Pharma ([www.tipharma.nl](http://www.tipharma.nl), includes co-funding from universities, government, and industry), the Dutch Medicines Evaluation Board, and the Dutch Ministry of Health; no other relationships or activities that could appear to have influenced the submitted work.

**Ethical approval:** Ethical approval was not required

**Data sharing:** No additional data available.



**References**

1. Choy EH, Panayi GS. Cytokine pathways and joint inflammation in rheumatoid arthritis. *N Engl J Med* 2001;344:907-16.
2. Wong JB, Ramey DR, Singh G. Long-term morbidity, mortality, and economics of rheumatoid arthritis. *Arthritis Rheum* 2001;44:2746-9.
3. NAO 2009. National Audit Offices. Services for people with rheumatoid arthritis. The Stationary Office. Available at: [www.nao.org.uk/publications/0809/services\\_for\\_people\\_with\\_rheum.aspx](http://www.nao.org.uk/publications/0809/services_for_people_with_rheum.aspx) (accessed April 2012)
4. Ovayolu N, Ovayolu O, Karadag G. Health-related quality of life in ankylosing spondylitis, fibromyalgia syndrome, and rheumatoid arthritis: a comparison with a selected sample of healthy individuals. *Clin Rheumatol* 2011;30:655-64.
5. Fleischmann R. Don't forget traditional DMARDs. Old friends are still useful. *Rheumatology* 2011;50:429-430.
6. Choy EH, Smith CM, Farewell V, et al. Factorial randomised controlled trial of glucocorticoids and combination disease modifying drugs in early rheumatoid arthritis. *Ann Rheum Dis* 2008;67:656-63.
7. Westlake SL, Colebatch AN, Baird J, et al. The effect of methotrexate on cardiovascular disease in patients with rheumatoid arthritis: a systematic literature review. *Rheumatology* 2010;49:295-307.
8. Smolen JS, Landewé R, Breedveld FC, et al. EULAR recommendations for the management of rheumatoid arthritis with synthetic and biological disease-modifying antirheumatic drugs. *Ann Rheum Dis* 2010;69:964-75.
9. Graudal N, Jürgens G. Similar effects of disease-modifying antirheumatic drugs, glucocorticoids, and biologic agents on radiographic progression in rheumatoid arthritis: meta-analysis of 70 randomized placebo-controlled or drug-controlled studies, including 112 comparisons. *Arthritis Rheum* 2010;62:2852-63.
10. NICE clinical guideline 79 – Rheumatoid arthritis. Available at: [www.nice.org.uk/nicemedia/pdf/CG79NICEGuideline.pdf](http://www.nice.org.uk/nicemedia/pdf/CG79NICEGuideline.pdf) (accessed April 2012)
11. Edwards CJ, Arden NK, Fisher D, et al. The changing use of disease-modifying anti-rheumatic drugs in individuals with rheumatoid arthritis from the United Kingdom General Practice Research Database. *Rheumatology* 2005;44:1394-1398.
12. Thomas SL, Edwards CJ, Smeeth L, et al. How Accurate Are Diagnoses for Rheumatoid Arthritis and Juvenile Idiopathic Arthritis in the General Practice Research Database? *Arthritis Rheum* 2008;59:1314-21.
13. Arnett FC, Edworthy SM, Bloch DA, et al. The American Rheumatism Association 1987 revised criteria for the classification of rheumatoid arthritis. *Arthritis Rheum* 1988;31:315-324.
14. van Nies JA, de Jong Z, van der Helm-van Mil AH, et al. Improved treatment strategies reduce the increased mortality risk in early RA patients. *Rheumatology* 2010;49:2210-6.
15. Rigby W, Ferraccioli G, Greenwald M, et al. Effect of rituximab on physical function and quality of life in patients with rheumatoid arthritis previously untreated with methotrexate. *Arthritis Care Res (Hoboken)* 2011;63:711-20.
16. Strand V, Singh JA. Newer biological agents in rheumatoid arthritis: impact on health-related quality of life and productivity. *Drugs*. 2010;70:121-45.
17. Russell AS, Wallenstein GV, Li T, et al. Abatacept improves both the physical and mental health of patients with rheumatoid arthritis who have inadequate response to methotrexate treatment. *Ann Rheum Dis* 2007;66:189-94.
18. Pollard L, Choy EH, Scott DL. The consequences of rheumatoid arthritis: quality of life measures in the individual patient. *Clin Exp Rheumatol*. 2005;23(5 Suppl 39):S43-52.

19. Lard LR, Visser H, Speyer I, et al. Early versus delayed treatment in patients with recent-onset rheumatoid arthritis: comparison of two cohorts who received different treatment strategies. *Am J Med* 2001;111:446–51.
20. Finckh A, Liang MH, van Herckenrode CM, et al. Long-term impact of early treatment on radiographic progression in rheumatoid arthritis: A meta-analysis. *Arthritis Rheum* 2006;55:864–72.
21. Singh JA, Christensen R, Wells GA, et al. Biologics for rheumatoid arthritis: an overview of Cochrane reviews. *Sao Paulo Med J* 2010;128:309–10.
22. Harrold LR, Harrington JT, Curtis JR, et al. Prescribing practices in a US cohort of rheumatoid arthritis patients before and after publication of the American College of Rheumatology treatment recommendations. *Arthritis Rheum* 2012;64:630-8.
23. Lawrenson R, Williams T, Farmer R. Clinical information for research; the use of general practice databases. *J Public Health Med* 1999;21:299–304.
24. IMS 2011. Usage of DMARDs (all indications) in Primary and Secondary Care. Source: IMS British Pharmaceutical Index (BPI) / IMS Hospital Pharmacy Index (HPA) 2011.
25. ACR; American College of Rheumatology Subcommittee on Rheumatoid Arthritis Guidelines. Guidelines for the management of rheumatoid arthritis: 2002 update. *Arthritis Rheum* 2002;46:328–46.



**Table 1:** Proportion of patients prescribed DMARDs within 12 months vs. number diagnosed according to time period across all regions.

| Time period     | No. of patients diagnosed with RA | No. of patients prescribed DMARD (%) | No. of patients prescribed methotrexate (%) | No. of patients prescribed DMARD combination (%) |
|-----------------|-----------------------------------|--------------------------------------|---------------------------------------------|--------------------------------------------------|
| 1995–1999       | 1620                              | 36.9%                                | 11.6%                                       | 0.9%                                             |
| 2000–2005       | 3411                              | 46.1%                                | 23.6%                                       | 3.5%                                             |
| 2006–April 2010 | 3218                              | 60.1%                                | 40.7%                                       | 9.0%                                             |

For peer review only

1  
2  
3  
4  
5  
6  
7 **Regional and temporal variation in the treatment of rheumatoid arthritis across the UK: a**  
8 **descriptive register-based cohort study**  
9

10  
11 **Authors**

12 Christopher J Edwards *consultant rheumatologist*<sup>1,2</sup>, Jennifer Campbell *research scientist*<sup>3</sup>, Tjeerd  
13 Van Staa *head of research*<sup>3,4</sup>, Nigel K Arden *professor of rheumatology*<sup>2,5</sup>.  
14  
15

16 <sup>1</sup>Department of Rheumatology, University Hospital Southampton NHS Foundation Trust,  
17 Southampton, United Kingdom, SO16 6YD; <sup>2</sup>University of Southampton, Southampton, United  
18 Kingdom SO16 6YD; <sup>3</sup>General Practice Research Database, Medicines and Healthcare products  
19 Regulatory Agency, London, United Kingdom SW1W 9SZ; <sup>4</sup>Utrecht Institute for Pharmaceutical  
20 Sciences, Utrecht University, Utrecht, the Netherlands; <sup>5</sup>Nuffield Department of Orthopaedics,  
21 Rheumatology and Musculoskeletal Sciences, University of Oxford, United Kingdom OX3 7HE.  
22  
23  
24

25 Correspondence to: Christopher J Edwards [cedwards@soton.ac.uk](mailto:cedwards@soton.ac.uk)  
26  
27  
28  
29  
30  
31  
32  
33  
34  
35  
36  
37  
38  
39  
40  
41  
42  
43  
44  
45  
46  
47  
48  
49  
50  
51  
52  
53  
54  
55  
56  
57  
58  
59  
60

## Abstract

**Objectives:** To describe current DMARD prescription in rheumatoid arthritis (RA) with reference to best practice and to identify temporal and regional trends in the UK

**Design:** Descriptive, register-based cohort study

**Participants:** Permanently registered patients aged  $\geq 18$  years with a recorded diagnosis of RA between 01/01/1995 and 31/03/2010 and matched controls. Participants with RA were identified through screening of all patients in the General Practice Research Database (GPRD) with a clinical or referral record for RA and at least one day of follow-up.

**Setting:** 639 general practices in the UK supplying data to the GPRD

**Main outcome measures:** Medication prescribing between 3 and 12 months of RA diagnosis by region and time period (1995–1999, 2000–2005, and 2006–April 2010).

**Results:** Of the 35,911 patients in the full RA cohort, 15,259 patients (42%) had incident RA. Analysis of prescribing in incident RA patients demonstrated that between 1995 (baseline) and 2010 there was a substantial increase in DMARD, and specifically methotrexate, prescribing across all regions with a less marked increase in combination DMARD prescribing. Taking 12-month prescribing as a snapshot: DMARD prescribing was 19–49% at baseline increasing to 45–74% by 2006–April 2010; methotrexate prescribing was 4–16% at baseline increasing to 32–60%; combination DMARD prescribing was 0–8% at baseline increasing to 3–17%. However there was marked regional variation in the proportion of RA patients receiving DMARD regardless of time period.

**Conclusions:** There has been a substantial increase in prescribing of DMARDs for RA since 1995; however regional variation persists across the UK with relative under-treatment, according to [established best practice and published national guidelines](#). Improved implementation of evidence-based best clinical practice to facilitate removal of treatment variation is warranted. [This may occur as a result of the implementation of published national guidance.](#)

**Key words:** *Rheumatoid arthritis, DMARDs, General Practice Research Database, regional variation.*

## Article summary

### Article focus:

- Over recent years there have been fundamental changes in the approach to treatment of rheumatoid arthritis (RA) with a move towards early and more aggressive treatment
- Disease-modifying anti-rheumatic drugs (DMARDs) are effective in the treatment of RA and their early use is recommended in national and international clinical guidelines and recommendations.
- We describe both temporal and regional trends in DMARD therapy for RA throughout the UK over a 15-year period and reveal whether the latest knowledge on how RA should be treated has been translated into actual clinical practice

### Key messages:

- There has been a substantial increase in DMARD prescription for RA and an increase in the proportion of patients prescribed DMARD earlier in the course of their disease between 1995 and 2010
- However, RA remains relatively under-treated according to best practice and published national guidelines, and regional variation persists
- There is a need to optimise dissemination and implementation of high-quality clinical guidelines and to monitor implementation.

### Strengths and limitations of this study:

- One of the strengths of the study was the size of the study population with 15,259 patients with incident RA and of the long-term follow-up of these patients (mean 5.5 years but up to 15.3 years for some patients). Another is the generalisability of the General Practice Research Database (GPRD) database from which our data was obtained.
- The coding of the diagnosis of RA is a potential limitation; however, GPRD has been validated in previous studies and in this study by the observation of similar demographics for DMARD versus non-DMARD users.

## Introduction

Rheumatoid arthritis (RA) is a chronic, systemic, autoimmune disease, the most common form of chronic joint inflammation [1], and is associated with substantial long-term morbidity, mortality and health-care costs [2]. A recent report from the National Audit Office (NAO) estimates that around 580,000 people have RA in England and that 26,000 patients are diagnosed with RA each year [3]. RA can have a profound effect on patients through the physical manifestations of the disease, associated complications and impact on health-related quality of life (HRQOL) [4]. Disease-modifying anti-rheumatic drugs (DMARDs), used either as monotherapy or in combination, can control disease activity, reduce joint erosions [5], improve quality of life [6] and also reduce the cardiovascular morbidity associated with RA [7].

Over recent years there have been fundamental changes in the approach to treatment of RA with the availability of newer therapies and a move towards early and more aggressive treatment [8]. A recent meta-analysis including data from 70 trials, demonstrates that aggressive treatment with combination DMARDs is able to reduce structural joint damage [9]. DMARDs have a critical role in the management of RA and are central to both European recommendations [8] and UK guidance [10]. Issued in February 2009, NICE clinical guidelines for the treatment of RA recommend a combination of DMARDs (including methotrexate and at least one other DMARD, plus short-term glucocorticoids) as first-line treatment ideally within 3 months of symptom onset for people with recently diagnosed active RA [10]. [The NICE guidance serves as an example of best practice although its publication in 2009 preclude us from determining accurately whether its recommendations have been taken up in this study.](#)

Much information regarding the use of DMARDs is from published experience within the tertiary care setting however it is unclear how well this reflects routine practice in secondary and primary care settings across the UK. Despite the demonstrated efficacy of DMARDs, data from over 34,000 primary care records collected between 1987 and 2002 indicate that only half of patients diagnosed with RA receive DMARD therapy [4,21]. The UK General Practice Research Database (GPRD) is an electronic database of primary care medical records. GPRD contains data on over 8% of the population and has data on over 11 million individuals (cumulative) with over 5 million currently active [4,2,13,11,12]. The GPRD has been used in several studies and the validity of an RA diagnosis in GPRD appears to be high for patients with specific characteristics [when using the American College of Rheumatology \(ACR\) diagnostic criteria as the standard \[12,13,13\]](#). [All patients in the UK will be seen by a primary care physician or general practitioner in addition to any secondary care physician needed for care of a specific illness. Although individuals with RA were recruited to the GPRD by a general practitioner the validation studies described show that a rheumatologist in secondary care will also have seen the vast majority of individuals \[4,312\]](#). The objectives of this study were to provide an updated view of current DMARD prescribing in RA with

1  
2  
3  
4  
5  
6 reference to best practice, to describe both temporal and regional trends in DMARD therapy for RA  
7 throughout the UK over a 15-year period, and to assess whether the latest knowledge on how RA  
8 should be treated has been translated into actual clinical practice.  
9

## 10 11 **Methods**

### 12 *Data source*

13  
14 We obtained data for this study from the GPRD which collates the computerized medical records of  
15 GPs. The data recorded in the GPRD include demographic information, prescription details, clinical  
16 events, preventive care provided, specialist referrals, hospital admissions, and major outcomes.  
17  
18 The GPRD contains the complete anonymised patient medical records from GPs who use the  
19 system from In Practice Systems (a software package used for patient medical records) and who  
20 agree to adhere to "Recording Guidelines" that are subject to detailed quality control checks of  
21 data at both practice and individual patient level.  
22

### 23 24 *Study design and population*

25 We conducted a descriptive, cohort study in permanently registered patients aged 18 years and  
26 over with a recorded diagnosis of RA between 01/01/1995 and 31/03/2010. We identified our  
27 study population through screening of all patients in the GPRD (n=11,480,996); who had a clinical  
28 or referral record for RA (n=63,238); with a record on or after 01/01/1995 (n=45,057); where this  
29 record was on or after the start of follow up (latest of patient registration or practice up-to-standard  
30 [UTS] date) (n=36,567); who were aged at least 18 at this date (n=36,035); and who had at least  
31 one day of follow-up (n=35,911). We used the same Read codes as in the previous RA validation  
32 study [4312].  
33  
34  
35

36  
37 The period of follow-up was from the date of first RA record up (i.e. index date) to the date of  
38 censoring (i.e. latest GPRD data collection, patient's transfer out of the practice, or patient's death,  
39 whichever date came first). The study population included patients with a record of RA prior to start  
40 of GPRD data collection (i.e., prevalent cases) and also RA patients with a first-ever record of RA  
41 at least 1 year after start of GPRD data collection (i.e. incident cases). Each RA patient was  
42 matched by age, gender and practice to three patients without a record of inflammatory disease  
43 (listed in Appendix 1).  
44  
45  
46

### 47 48 *Analysis of utilisation characteristics*

49 We conducted an analysis to describe the exposure characteristics of incident RA patients from  
50 index date. We measured the prevalence of use of different medications stratified by age at  
51 diagnosis (at date of first-ever record of RA), age at time of measurement, sex, calendar year and  
52 strategic health authority. We determined the prevalence of medication use by evaluating GP  
53 prescribing in the 6 months before the index date of the following DMARDS: methotrexate;  
54  
55  
56

1  
2  
3  
4  
5  
6 sulfasalazine; hydroxychloroquine; gold (sodium aurothiomalate); auranofin; penicillamine;  
7 leflunomide; azathioprine; ciclosporin; and cyclophosphamide. Of note, GPRD captures information  
8 on all prescriptions issued both acute and repeat, along with dosage instructions.  
9

## 10 11 **Results**

### 12 *Baseline characteristics*

13  
14 The full cohort included both incident and prevalent RA cases and comprised a total of 35,911  
15 patients. RA patients and matched controls were well balanced in terms of age, gender and  
16 socioeconomic status. However, there was a higher prevalence of smokers and a lower prevalence  
17 of drinkers among RA patients. Of the 35,911 patients in the full RA cohort, a subgroup of 15,259  
18 patients (42%) had incident RA. With regard to treatment, there was a 10-fold increase in  
19 prescribing of prednisolone for incident RA patients versus matched controls and a 9-fold increase  
20 in prescribing of non-steroidal anti-inflammatory drugs (NSAIDs) in the 6 months prior to diagnosis.  
21  
22

### 23 24 *Prescription practice by region and time period for incident patients*

#### 25 *General trends*

26  
27 The data was analysed to assess the proportion of incident RA patients prescribed either DMARD,  
28 methotrexate or combination DMARD within 3, 6 or 12 months of diagnosis according to  
29 geographic region and according to time period (1995–1999, 2000–2005, and 2006–April 2010)  
30 (Appendix 2). In general, the data indicate that across all regions and within each time period, the  
31 proportion of patients prescribed DMARDs including methotrexate increased between 3 months  
32 and 12 months. However, increases in the proportion of patients prescribed combination DMARDs  
33 were less marked with either no or little increase between 3–6 and 6–12 months but a modest  
34 overall increase between 3 and 12 months.  
35  
36

#### 37 38 *Temporal change in medication prescribing*

39  
40 In order to provide a snapshot of change in DMARD usage over time, the data was analysed to  
41 assess the proportion of patients prescribed either any DMARD, methotrexate or any combination  
42 of DMARDs within 12 months according to time period (1995–1999, 2000–2005, and 2006–April  
43 2010) (Table 1). There was a substantial increase in 12-month prescribing of DMARD (from 36.9%  
44 to 60.1%), methotrexate (from 11.6% to 40.7%), and combination DMARD (from 0.9% to 9.1%)  
45 over the 15-year time period. Analysis of regional data demonstrated an increase in the proportion  
46 of patients prescribed DMARDs at 12 months across all regions during the 15-year time period  
47 (Figure 1). At baseline (1995–1999) between 19.29% (East Midlands) and 49.06% (Northern  
48 Ireland) of patients were prescribed DMARDs at 12 months; by 2006–April 2010 the rate of  
49 prescribing had increased from between 45.32% (London) to 73.6% (Scotland). A general trend for  
50 increased prescription of DMARDs/methotrexate between 3–12 months was also evident across all  
51 regions. Of note, combination DMARDs tended to be prescribed after 3 months with increasing  
52  
53  
54  
55

1  
2  
3  
4  
5  
6 prescription between 6 and 12 months and between 1995–April 2010 across all regions (Appendix  
7 2).

### 8 9 *Regional variation*

10 Analysis of data focusing on prescribing of DMARDs at 12 months demonstrates substantial  
11 regional variation in DMARD prescribing regardless of time period (Figure 21). Regional variation  
12 in DMARD prescribing at 12 months ranged from 19.29–49.06% between 1995–1999; from 36.09–  
13 60.17% between 2000–2005; and from 45.32–73.6% between 2006–April 2010. The regional  
14 difference in the proportion of patients prescribed DMARD at 12 months ranged from 24–30%  
15 within each time period. Prescribing patterns of methotrexate and combination DMARDs also  
16 varied from region to region regardless of time period (Appendix 2).  
17  
18  
19

### 20 21 *Time from diagnosis to treatment*

22 The data for incident patients with UTS data of five years was analysed to evaluate time from  
23 diagnosis to treatment with either DMARD and/or methotrexate. For 5,513 patients prescribed a  
24 DMARD, the median time from diagnosis to treatment was 50 days (interquartile range [IQR] 0–  
25 1,826); for 3,754 patients prescribed methotrexate, the median time from diagnosis to treatment  
26 was 119 days (IQR 0–1,826); while for 1,310 patients prescribed combination DMARD the median  
27 time from diagnosis to treatment was 560 days (IQR 0–1,826).  
28  
29  
30

## 31 32 **Discussion**

33 We have demonstrated that between 1995 and 2010 there was a substantial increase in DMARD,  
34 methotrexate and combination DMARD prescribing across all regions. In this 15-year period, 12-  
35 month prescribing of DMARD almost doubled rising from 36.9% to 60.1%; 12-month prescribing of  
36 methotrexate quadrupled from 11.6% to 40.7%; and 12-month prescribing of combination DMARD  
37 showed a ten-fold increase from 0.9% to 9.0%. However, some 40% of patients were not receiving  
38 DMARD at 12 months despite national clinical guidelines recommending this therapy within 3  
39 months of diagnosis [10] indicating a relative under-treatment of RA. In addition, the marked  
40 regional variation in the prescription of DMARDs within the UK persists and has not decreased with  
41 time. To our knowledge, this is the first time that data on the use of DMARDs over this time period  
42 has been examined in a large RA population in the UK.  
43  
44  
45  
46

### 47 48 **Clinical implications**

49 Several studies indicate that appropriate and timely use of DMARDs and biologics for  
50 management of RA can improve outcomes such as mortality risk and HRQOL [16, 17, 18, 19, 14,  
51 15, 16, 17]. However previous studies indicate that many patients receive insufficient treatment  
52 [20, 18] and that there is variation in practice in the management of RA [3]. Our current data confirm  
53 the significant regional variation both in the timing of DMARD or methotrexate therapy and in the  
54  
55  
56  
57  
58  
59  
60



1  
2  
3  
4  
5  
6 proportion of patients diagnosed with RA receiving these therapies at specific time points. Based  
7 on the latest data from 2006–April 2010 for regions in England (i.e. excluding Wales, Scotland and  
8 Northern Ireland), the proportion of RA patients receiving DMARDs at 12 months between 2006–  
9 April 2010 ranges from 45.32% (London) to 66.83% (South Central). In addition, the proportion of  
10 RA patients in England receiving methotrexate at 12 months in this latest time period ranges from  
11 32.11% (North East) to 51.62% (South Central); at best two-thirds of RA patients in England are  
12 being prescribed DMARDs and approximately one-half of RA patients in England are being  
13 prescribed methotrexate by 12 months (Appendix 2).  
14  
15  
16

17  
18 The underlying reasons for this variation are not clear but could be due to several factors such as  
19 differences in RA health spend or differences in implementation and sharing of best practice. With  
20 the devolution of the NHS in 1999, differences in health services management and delivery exist  
21 between England, Scotland, Wales and Northern Ireland. Interestingly, our data indicate that  
22 Scotland and Northern Ireland have the highest proportion of RA patients prescribed DMARDs at  
23 12 months (73.6% and 70.14%, respectively) and Northern Ireland the highest proportion of  
24 patients prescribed methotrexate at 12 months (60.42%; 34.78% in Scotland). This may suggest  
25 that there are lessons to be learned from regions which demonstrate good practice, possibly  
26 through understanding the impact of different networks, interaction and communication and the  
27 impact of different health spend priorities. [In addition, it would be interesting to examine if regions  
28 with more aggressive use of DMARDs may use more or less biological therapies.](#) Of note, there is  
29 as yet no benchmark defining the proportion of RA patients who should be prescribed DMARDs.  
30 These drugs are not suitable for *all* RA patients for example those with contraindications and  
31 women trying to conceive. Therefore the 'ideal' would be less than 100% of patients and possibly  
32 around 80% seems a realistic estimate of the proportion of RA patients eligible for DMARD  
33 therapy.  
34  
35  
36  
37  
38  
39

40 Several reports emphasize the importance of early and appropriate intervention in RA to optimise  
41 patient outcomes [10, 2419]. A meta-analysis assessing the long-term impact of early treatment on  
42 radiographic progression in RA which included 1,133 patients identified a critical period for the  
43 initiation of RA therapy, a 'therapeutic window of opportunity' early in the course of RA which was  
44 associated with durable benefit in radiographic progression for a period of up to 5 years. In this  
45 analysis, there was a 33% reduction in long-term progression rates in patients receiving early  
46 therapy for their disease compared with those treated later [2220]. Importantly, suboptimal  
47 treatment can lead to joint damage necessitating surgery (with the associated resource  
48 implications), and to a higher mortality risk from cardiovascular disease, a risk which can be  
49 mitigated with appropriate and timely methotrexate treatment [7].  
50  
51  
52  
53  
54  
55  
56  
57  
58  
59  
60

1  
2  
3  
4  
5  
6 In our study, median time from diagnosis to treatment with DMARD, methotrexate or combination  
7 DMARD was 50, 119, and 560 days, respectively. This compares with NICE clinical guideline  
8 recommendations for combination DMARD treatment (including methotrexate) to be used as first-  
9 line therapy within 3 months of the onset of persistent symptoms [10]. Our findings indicate that RA  
10 patients who do receive methotrexate have it prescribed a median 4 months after diagnosis. Prior  
11 to diagnosis many patients in our study were already receiving treatment or therapies that may  
12 ameliorate the symptoms of RA (Appendix 3): this may further delay treatment as RA symptoms  
13 are masked though damage continues and can impact outcomes. Given the likely delay between  
14 symptom onset and diagnosis, the time from symptom onset to methotrexate is probably greater  
15 than 4 months. Furthermore it should be noted that during the most recent time period (2006–April  
16 2010) by 12 months at best only half of diagnosed RA patients were prescribed methotrexate  
17 (51.62%; South Central region).  
18  
19  
20  
21  
22

23 Effective treatments for RA are available [8, 2321] however, the results from our study demonstrate  
24 that RA is often suboptimally treated and that regional variation in the management of RA persists  
25 after almost two years of guidance being available. Despite a recommendation for first-line  
26 treatment with combination DMARDs, fewer than 1 in 10 RA patients in the UK receive this  
27 therapy. Although there has been an encouraging increase in DMARD and methotrexate  
28 prescribing ~~it is too early for us to conclude with any accuracy whether the more recently published  
29 NICE and EULAR guidelines have influenced DMARD prescribing in the UK. post-NICE  
30 recommendations, these appear to reflect a general upward trend rather than rapid implementation  
31 and uptake of NICE guidelines. However, it is too early for us to conclude with any accuracy  
32 whether the NICE guidance is influencing DMARD prescribing in the UK.~~ Recently published data  
33 indicate that the challenge of RA guideline implementation is not restricted to the UK. Assessment  
34 of prescribing practices in a US cohort of RA patients before and after publication of American  
35 College of Rheumatology (ACR) treatment recommendations indicates that at best only around  
36 50% of RA patients with active disease receive care consistent with the current recommendations  
37 [2522].  
38  
39  
40  
41  
42  
43

44 The longer term impact of our findings should be considered including the cost of surgical  
45 intervention when RA is suboptimally controlled resulting in joint damage. Policymakers should be  
46 aware of the persistence of variation and assess how best to minimise inequalities in RA care. A  
47 future challenge is how best to disseminate and embed new standards of care into routine clinical  
48 practice especially for chronic diseases such as RA where treatment is undertaken by a range of  
49 healthcare professionals in different settings. This is likely to be ever more relevant as the care of  
50 patients with chronic disease increasingly is being transferred into the community setting.  
51 We conclude that there is a need to optimise dissemination and implementation of high-quality  
52 clinical guidelines, that systems and processes for monitoring implementation should be  
53  
54  
55  
56  
57  
58  
59  
60

1  
2  
3  
4  
5  
6 developed, and that relevant indicators should be incorporated to ensure that guidelines are  
7 followed. Furthermore, accurate information on current prescribing in RA is vital to inform the  
8 development of the planned NICE Quality Standard for RA.  
9

### 10 11 **Strengths and weaknesses**

12 One of the strengths of our study was the size of the study population with 15,259 patients with  
13 incident RA and of the long-term follow-up of these patients (mean 5.5 years but up to 15.3 years  
14 for some patients). Another is the generalisability of the GPRD database from which our data was  
15 obtained. The GPRD is representative of patients and practices throughout the UK [4423], and  
16 encompasses patients treated in primary, secondary and tertiary care. The regional variation  
17 observed in prescribing of DMARDs could be due to regional differences in the incidence of RA.  
18 However, data on age of diagnosis over the duration of the study (Appendix 3) together with data  
19 (for 2009) on point prevalence and incidence rates for RA in the GPRD (Appendix 4) were as  
20 expected, indicating robustness of the data.  
21  
22  
23

24  
25 The coding of the diagnosis of RA is a potential limitation. However, GPRD has been validated in  
26 previous studies [4312] and again in this study by the observation of similar demographics for  
27 DMARD versus non-DMARD users. Furthermore, practices are monitored for the accuracy and  
28 completeness of data they submit to the GPRD data by running set queries on the data and as  
29 they are reimbursed by GPRD, penalties can be levied against practices that routinely fail to meet  
30 recording standards [4423]. It is also unlikely that our results are compromised by healthcare  
31 seeking behaviour given the similar rates of prescribing of non-antirheumatic medication (statins,  
32 aspirin, antihypertensives and diabetic medications) in the full RA cohort versus matched controls  
33 (Appendix 3). There may be temporal and regional variation in when GPs start to prescribe  
34 DMARDs. In some areas the GP initiates the first DMARD prescription on the advice of the  
35 rheumatologist; in other areas the hospital rheumatologist may initiate prescribing for a period of  
36 time. However by 12 months it seems likely that most prescribing will be via the GP. This is  
37 supported by data from the IMS British Pharmaceutical Index (BPI) / IMS Hospital Pharmacy Index  
38 (HPA) which demonstrates that across all indications, over 90% of all DMARDs prescribing is  
39 carried out within primary care; for methotrexate, around 75–80% of all prescribing is carried out in  
40 the primary care setting [4524]. [We have recently performed a survey of primary care trust \(PCTs\)  
41 in England that suggests more than 90% of methotrexate prescribing is ultimately performed in  
42 primary care with 77% by 6 months \(personal communication submitted for publication\).](#)  
43 [Prescribing data for the use of DMARDs appears to be strong in the GPRD. However, as  
44 biological therapies are not usually prescribed by primary care we are unable to comment on their  
45 use as the GPRD only contains very limited information on their prescribing.](#)  
46  
47  
48  
49  
50  
51  
52  
53  
54  
55  
56  
57  
58  
59  
60

## Conclusions

In summary, there has been a substantial improvement in the treatment of RA across the UK over the 15-year period from 1995–2010 with increasing use of DMARDs which currently represent best clinical practice. Despite this improvement, RA remains under-treated according to clinical recommendations and guidelines in the UK [10] and elsewhere [2425]. In addition regional variation in DMARD and methotrexate prescribing persists across the UK ~~and publication of national clinical guidelines does not appear to have had a marked impact on standardising prescribing behaviour.~~

Improvement in RA treatment is needed UK-wide: identification and assessment of models of RA treatment that demonstrate implementation of evidence-based best clinical practice would minimise variation, facilitate nationally a uniform approach to RA treatment, to both improve patient outcomes and optimise resource use.

1  
2  
3  
4  
5  
6 **Acknowledgements** We thank Claire Housden and Kirsty Roberts (Roche Products Ltd) for  
7 procuring project funding and Ify Sargeant (ismedica Ltd) for medical writing support, funded by  
8 Roche Products Ltd.  
9

10 **Contributors:** CJE, NKA, TvS and JC made primary contributions to study design, data collection,  
11 data analysis, interpretation of results, and writing the manuscript. All authors contributed to the  
12 interpretation of results and critical revision of the manuscript and approved the final manuscript.  
13 All authors had full access to all of the data (including statistical reports and tables) in the study  
14 and can take responsibility for the integrity of the data and the accuracy of the data analysis. CJE  
15 is the guarantor.  
16

17 **Funding:** This work was supported by Roche-Chugai who funded data generation and analysis by  
18 GPRD. Funding sources had no influence on the study design, interpretation of results, or decision  
19 to submit the article.  
20

21 **Competing interests:** All authors have completed the Unified Competing Interest form at  
22 [www.icmje.org/coi\\_disclosure.pdf](http://www.icmje.org/coi_disclosure.pdf) (available on request from the corresponding author) and  
23 declare: financial support for the submitted work from Roche-Chugai; CJE has acted as speaker  
24 for and received research funding from Roche, UCB, Abbott, GSK and Pfizer; NKA has acted as  
25 speaker for and received research funding from Roche, Merck, Q-Med, NICOX, Flexion, Servier,  
26 GSK, Amgen and Lilly; GPRD (JC and TvS) has received funding from the MHRA, Wellcome  
27 Trust, Medical Research Council, NIHR Health Technology Assessment programme, Innovative  
28 Medicine Initiative, UK Department of Health, Technology Strategy Board, Seventh Framework  
29 Programme EU, various universities, contract research organisations and pharmaceutical  
30 companies. The department of Pharmacoepidemiology & Pharmacotherapy, Utrecht Institute for  
31 Pharmaceutical Sciences (TvS) has received unrestricted funding for pharmacoepidemiological  
32 research from GlaxoSmithKline, Novo Nordisk, the private-public funded Top Institute Pharma  
33 ([www.tipharma.nl](http://www.tipharma.nl), includes co-funding from universities, government, and industry), the Dutch  
34 Medicines Evaluation Board, and the Dutch Ministry of Health; no other relationships or activities  
35 that could appear to have influenced the submitted work.  
36

37 **Ethical approval:** Ethical approval was not required  
38

39 **Data sharing:** No additional data available.  
40  
41  
42  
43  
44  
45  
46  
47  
48  
49  
50  
51  
52  
53  
54  
55  
56  
57  
58  
59  
60

## References

1. [Choy EH, Panayi GS. Cytokine pathways and joint inflammation in rheumatoid arthritis. \*N Engl J Med\* 2001;344:907-16.](#)
4. [Cooney JK, Law RJ, Matschke V, et al. Benefits of exercise in rheumatoid arthritis. \*J Aging Res\* 2011. Article ID 681640, 14 pages, 2011. doi:10.4061/2011/681640.](#)
2. Wong JB, Ramey DR, Singh G. Long-term morbidity, mortality, and economics of rheumatoid arthritis. *Arthritis Rheum* 2001;44:2746-9.
3. NAO 2009. National Audit Offices. Services for people with rheumatoid arthritis. The Stationary Office. Available at: [www.nao.org.uk/publications/0809/services\\_for\\_people\\_with\\_rheum.aspx](http://www.nao.org.uk/publications/0809/services_for_people_with_rheum.aspx) (accessed April 2012)
4. Ovayolu N, Ovayolu O, Karadag G. Health-related quality of life in ankylosing spondylitis, fibromyalgia syndrome, and rheumatoid arthritis: a comparison with a selected sample of healthy individuals. *Clin Rheumatol* 2011;30:655-64.
5. Fleischmann R. Don't forget traditional DMARDs. Old friends are still useful. *Rheumatology* 2011;50:429-430.
6. Choy EH, Smith CM, Farewell V, et al. Factorial randomised controlled trial of glucocorticoids and combination disease modifying drugs in early rheumatoid arthritis. *Ann Rheum Dis* 2008;67:656-63.
7. Westlake SL, Colebatch AN, Baird J, et al. The effect of methotrexate on cardiovascular disease in patients with rheumatoid arthritis: a systematic literature review. *Rheumatology* 2010;49:295-307.
8. Smolen JS, Landewé R, Breedveld FC, et al. EULAR recommendations for the management of rheumatoid arthritis with synthetic and biological disease-modifying antirheumatic drugs. *Ann Rheum Dis* 2010;69:964-75.
9. Graudal N, Jürgens G. Similar effects of disease-modifying antirheumatic drugs, glucocorticoids, and biologic agents on radiographic progression in rheumatoid arthritis: meta-analysis of 70 randomized placebo-controlled or drug-controlled studies, including 112 comparisons. *Arthritis Rheum* 2010;62:2852-63.
10. NICE clinical guideline 79 – Rheumatoid arthritis. Available at: [www.nice.org.uk/nicemedia/pdf/CG79NICEGuideline.pdf](http://www.nice.org.uk/nicemedia/pdf/CG79NICEGuideline.pdf) (accessed April 2012)
11. ~~[Visser K, van der Heijde D. Optimal dosage and route of administration of methotrexate in rheumatoid arthritis: a systematic review of the literature. \*Ann Rheum Dis\* 2009;68:1094-1099.](#)~~
12. ~~[Edwards CJ, Arden NK, Fisher D, et al. The changing use of disease-modifying antirheumatic drugs in individuals with rheumatoid arthritis from the United Kingdom General Practice Research Database. \*Rheumatology\* 2005;44:1394-1398.](#)~~
13. ~~[Thomas SL, Edwards CJ, Smeeth L, et al. How Accurate Are Diagnoses for Rheumatoid Arthritis and Juvenile Idiopathic Arthritis in the General Practice Research Database? \*Arthritis Rheum\* 2008;59:1314-21.](#)~~
14. ~~[Arnett FC, Edworthy SM, Bloch DA, et al. The American Rheumatism Association 1987 revised criteria for the classification of rheumatoid arthritis. \*Arthritis Rheum\* 1988;31:315-324.](#)~~
14. [van Nies JA, de Jong Z, van der Helm-van Mil AH, et al. Improved treatment strategies reduce the increased mortality risk in early RA patients. \*Rheumatology\* 2010;49:2210-6.](#)
15. [Rigby W, Ferraccioli G, Greenwald M, et al. Effect of rituximab on physical function and quality of life in patients with rheumatoid arthritis previously untreated with methotrexate. \*Arthritis Care Res \(Hoboken\)\* 2011;63:711-20.](#)

Formatted: Bullets and Numbering

Formatted: Spanish (International Sort)

16. [Strand V, Singh JA. Newer biological agents in rheumatoid arthritis: impact on health-related quality of life and productivity. Drugs. 2010;70:121–45.](#)
- 13.17. [Russell AS, Wallenstein GV, Li T, et al. Abatacept improves both the physical and mental health of patients with rheumatoid arthritis who have inadequate response to methotrexate treatment. Ann Rheum Dis 2007;66:189–94.](#)
18. [Pollard L, Choy EH, Scott DL. The consequences of rheumatoid arthritis: quality of life measures in the individual patient. Clin Exp Rheumatol. 2005;23\(5 Suppl 39\):S43–52.](#)
19. [Lard LR, Visser H, Speyer I, et al. Early versus delayed treatment in patients with recent-onset rheumatoid arthritis: comparison of two cohorts who received different treatment strategies. Am J Med 2001;111:446–51.](#)
20. [Finckh A, Liang MH, van Herckenrode CM, et al. Long-term impact of early treatment on radiographic progression in rheumatoid arthritis: A meta-analysis. Arthritis Rheum 2006;55:864–72.](#)
21. [Singh JA, Christensen R, Wells GA, et al. Biologics for rheumatoid arthritis: an overview of Cochrane reviews. Sao Paulo Med J 2010;128:309–10.](#)
22. [Harrold LR, Harrington JT, Curtis JR, et al. Prescribing practices in a US cohort of rheumatoid arthritis patients before and after publication of the American College of Rheumatology treatment recommendations. Arthritis Rheum 2012;64:630–8.](#)
- 44.23. [Lawrenson R, Williams T, Farmer R. Clinical information for research; the use of general practice databases. J Public Health Med 1999;21:299–304.](#)
- 45.24. [IMS 2011. Usage of DMARDs \(all indications\) in Primary and Secondary Care. Source: IMS British Pharmaceutical Index \(BPI\) / IMS Hospital Pharmacy Index \(HPA\) 2011.](#)
- 16.van Nies JA, de Jong Z, van der Holm-van Mil AH, et al. Improved treatment strategies reduce the increased mortality risk in early RA patients. Rheumatology 2010;49:2210–6.
17. Rigby W, Ferraccioli G, Greenwald M, et al. Effect of rituximab on physical function and quality of life in patients with rheumatoid arthritis previously untreated with methotrexate. Arthritis Care Res (Hoboken) 2011;63:711–20.
18. Strand V, Singh JA. Newer biological agents in rheumatoid arthritis: impact on health-related quality of life and productivity. Drugs. 2010;70:121–45.
19. Russell AS, Wallenstein GV, Li T, et al. Abatacept improves both the physical and mental health of patients with rheumatoid arthritis who have inadequate response to methotrexate treatment. Ann Rheum Dis 2007;66:189–94.
20. Pollard L, Choy EH, Scott DL. The consequences of rheumatoid arthritis: quality of life measures in the individual patient. Clin Exp Rheumatol. 2005;23(5 Suppl 39):S43–52.
21. Lard LR, Visser H, Speyer I, et al. Early versus delayed treatment in patients with recent-onset rheumatoid arthritis: comparison of two cohorts who received different treatment strategies. Am J Med 2001;111:446–51.
22. Finckh A, Liang MH, van Herckenrode CM, et al. Long term impact of early treatment on radiographic progression in rheumatoid arthritis: A meta-analysis. Arthritis Rheum 2006;55:864–72.
23. Singh JA, Christensen R, Wells GA, et al. Biologics for rheumatoid arthritis: an overview of Cochrane reviews. Sao Paulo Med J 2010;128:309–10.
- 24.25. [ACR; American College of Rheumatology Subcommittee on Rheumatoid Arthritis Guidelines. Guidelines for the management of rheumatoid arthritis: 2002 update. Arthritis Rheum 2002;46:328–46.](#)

Formatted: Bullets and Numbering

Formatted: Spanish (International Sort)

Formatted: Indent: Left: 0.5", No bullets or numbering

Formatted: Bullets and Numbering

Formatted: Font: Italic

Formatted: Indent: Left: 0.5", No bullets or numbering

Formatted: Bullets and Numbering

1  
2  
3  
4  
5  
6 25. Harrold LR, Harrington JT, Curtis JR, et al. Prescribing practices in a US cohort of  
7 rheumatoid arthritis patients before and after publication of the American College of  
8 Rheumatology treatment recommendations. *Arthritis Rheum* 2012;64:630-8.  
9  
10  
11  
12  
13  
14  
15  
16  
17  
18  
19  
20  
21  
22  
23  
24  
25  
26  
27  
28  
29  
30  
31  
32  
33  
34  
35  
36  
37  
38  
39  
40  
41  
42  
43  
44  
45  
46  
47  
48  
49  
50  
51  
52  
53  
54  
55  
56  
57  
58  
59  
60

For peer review only



**Table 1:** Proportion of patients prescribed DMARDs within 12 months vs. number diagnosed according to time period across all regions.

| Time period     | No. of patients diagnosed with RA | No. of patients prescribed DMARD (%) | No. of patients prescribed methotrexate (%) | No. of patients prescribed DMARD combination (%) |
|-----------------|-----------------------------------|--------------------------------------|---------------------------------------------|--------------------------------------------------|
| 1995–1999       | 1620                              | 36.9%                                | 11.6%                                       | 0.9%                                             |
| 2000–2005       | 3411                              | 46.1%                                | 23.6%                                       | 3.5%                                             |
| 2006–April 2010 | 3218                              | 60.1%                                | 40.7%                                       | 9.0%                                             |

1  
2  
3  
4  
5  
6  
7  
8  
9  
10  
11  
12  
13  
14  
15  
16  
17  
18  
19  
20  
21  
22  
23  
24  
25  
26  
27  
28  
29  
30  
31  
32  
33  
34  
35  
36  
37  
38  
39  
40  
41  
42  
43  
44  
45  
46  
47  
48  
49  
50  
51  
52  
53  
54  
55  
56  
57  
58  
59  
60

**DMARD at  
12 months 1995-1999**



Figure 1a: Percentage of patients prescribed DMARDs at 12 months by region for the time period 1995-1999.  
228x125mm (150 x 150 DPI)

review only

DMARD at  
12 months 2000-2005

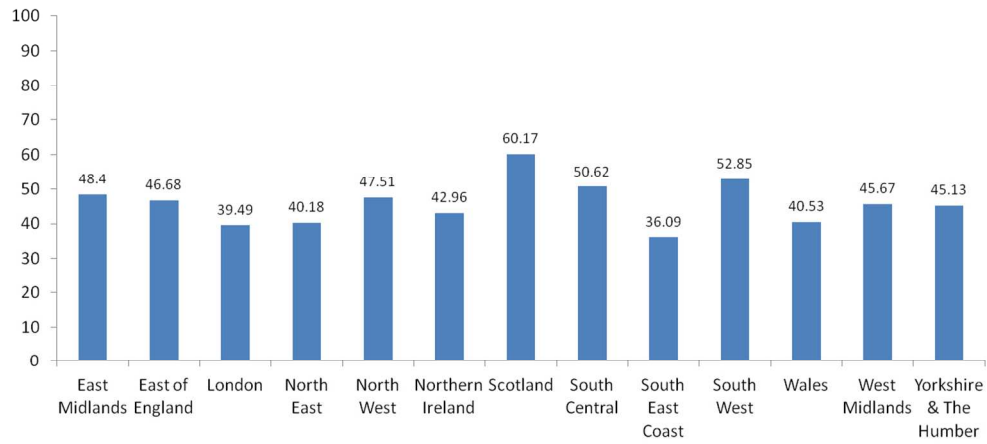

Figure 1b: Percentage of patients prescribed DMARDs at 12 months by region for the time period 2000-2005.  
228x125mm (150 x 150 DPI)

1  
2  
3  
4  
5  
6  
7  
8  
9  
10  
11  
12  
13  
14  
15  
16  
17  
18  
19  
20  
21  
22  
23  
24  
25  
26  
27  
28  
29  
30  
31  
32  
33  
34  
35  
36  
37  
38  
39  
40  
41  
42  
43  
44  
45  
46  
47  
48  
49  
50  
51  
52  
53  
54  
55  
56  
57  
58  
59  
60



Figure 1c: Percentage of patients prescribed DMARDs at 12 months by region for the time period 2006–2010.  
228x125mm (150 x 150 DPI)

review only

1  
2  
3 *Appendix 1*

4 Each RA patient was matched by age, gender and practice to three patients without a record  
5 of inflammatory disease such as RA, juvenile arthritis, ankylosing spondylitis, enteropathic  
6 arthritis, reactive arthritis, inflammatory arthritis [seronegative], systemic lupus  
7 erythematosus [SLE], Sjogren's syndrome, mixed connective tissue disease [MCTD],  
8 polymyositis/dermatomyositis, scleroderma, polymyalgia rheumatica, giant cell arteritis,  
9 vasculitis [Wegeners], microscopic polyangiitis [MPA], Churg-strauss syndrome, polyarteritis  
10 nodosa [PAN], Takayasu arteritis, inflammatory bowel disease, sarcoidosis and psoriasis.  
11  
12  
13  
14  
15  
16  
17  
18  
19  
20  
21  
22  
23  
24  
25  
26  
27  
28  
29  
30  
31  
32  
33  
34  
35  
36  
37  
38  
39  
40  
41  
42  
43  
44  
45  
46  
47  
48  
49  
50  
51  
52  
53  
54  
55  
56  
57  
58  
59  
60

Appendix 2: Medications usage by region and by time period

| Region          | Time period     | No. of patients diagnosed | No. of patients prescribed DMARD at 3 months (%) | No. of patients prescribed DMARD at 6 months (%) | No. of patients prescribed DMARD at 12 months (%) | No. of patients prescribed methotrexate at 3 months (%) | No. of patients prescribed methotrexate at 6 months (%) | No. of patients prescribed methotrexate at 12 months (%) | No. of patients prescribed combination DMARDs at 3 months (%) | No. of patients prescribed combination DMARDs at 6 months (%) | No. of patients prescribed combination DMARDs at 12 months (%) |
|-----------------|-----------------|---------------------------|--------------------------------------------------|--------------------------------------------------|---------------------------------------------------|---------------------------------------------------------|---------------------------------------------------------|----------------------------------------------------------|---------------------------------------------------------------|---------------------------------------------------------------|----------------------------------------------------------------|
| East Midlands   | 1995_1999       | 197                       | 22 (11.17%)                                      | 31 (15.74%)                                      | 38 (19.29%)                                       | 1 (0.51%)                                               | 2 (1.02%)                                               | 7 (3.55%)                                                | . (%)                                                         | . (%)                                                         | . (%)                                                          |
|                 | 2000_2005       | 219                       | 57 (26.03%)                                      | 84 (38.36%)                                      | 106 (48.40%)                                      | 20 (9.13%)                                              | 44 (20.09%)                                             | 58 (26.48%)                                              | . (%)                                                         | . (%)                                                         | 4 (1.83%)                                                      |
|                 | 2006_April 2010 | 149                       | 63 (42.28%)                                      | 75 (50.34%)                                      | 83 (55.70%)                                       | 27 (18.12%)                                             | 38 (25.50%)                                             | 49 (32.89%)                                              | . (%)                                                         | 4 (2.68%)                                                     | 7 (4.70%)                                                      |
| East of England | 1995_1999       | 236                       | 68 (28.81%)                                      | 92 (38.98%)                                      | 108 (45.76%)                                      | 18 (7.63%)                                              | 22 (9.32%)                                              | 31 (13.14%)                                              | . (%)                                                         | . (%)                                                         | 2 (0.85%)                                                      |
|                 | 2000_2005       | 512                       | 157 (30.66%)                                     | 204 (39.84%)                                     | 239 (46.68%)                                      | 64 (12.50%)                                             | 85 (16.60%)                                             | 113 (22.07%)                                             | 2 (0.39%)                                                     | 2 (0.39%)                                                     | 16 (3.13%)                                                     |
|                 | 2006_April 2010 | 353                       | 143 (40.51%)                                     | 178 (50.42%)                                     | 197 (55.81%)                                      | 86 (24.36%)                                             | 111 (31.44%)                                            | 129 (36.54%)                                             | 13 (3.68%)                                                    | 16 (4.53%)                                                    | 23 (6.52%)                                                     |
| London          | 1995_1999       | 154                       | 33 (21.43%)                                      | 44 (28.57%)                                      | 55 (35.71%)                                       | 11 (7.14%)                                              | 14 (9.09%)                                              | 18 (11.69%)                                              | 1 (0.65%)                                                     | 1 (0.65%)                                                     | 1 (0.65%)                                                      |
|                 | 2000_2005       | 314                       | 80 (25.48%)                                      | 102 (32.48%)                                     | 124 (39.49%)                                      | 43 (13.69%)                                             | 60 (19.11%)                                             | 76 (24.20%)                                              | 1 (0.32%)                                                     | 3 (0.96%)                                                     | 7 (2.23%)                                                      |
|                 | 2006_April 2010 | 331                       | 91 (27.49%)                                      | 123 (37.16%)                                     | 150 (45.32%)                                      | 65 (19.64%)                                             | 91 (27.49%)                                             | 116 (35.05%)                                             | 9 (2.72%)                                                     | 15 (4.53%)                                                    | 26 (7.85%)                                                     |
| North East      | 1995_1999       | 39                        | 9 (23.08%)                                       | 12 (30.77%)                                      | 17 (43.59%)                                       | 1 (2.56%)                                               | 2 (5.13%)                                               | 5 (12.82%)                                               | . (%)                                                         | . (%)                                                         | . (%)                                                          |
|                 | 2000_2005       | 112                       | 28 (25.00%)                                      | 41 (36.61%)                                      | 45 (40.18%)                                       | 6 (5.36%)                                               | 13 (11.61%)                                             | 18 (16.07%)                                              | . (%)                                                         | . (%)                                                         | 1 (0.89%)                                                      |
|                 | 2006_April 2010 | 109                       | 30 (27.52%)                                      | 43 (39.45%)                                      | 55 (50.46%)                                       | 17 (15.60%)                                             | 25 (22.94%)                                             | 35 (32.11%)                                              | 1 (0.92%)                                                     | 1 (0.92%)                                                     | 7 (6.42%)                                                      |

| Region           | Time period     | No. of patients diagnosed | No. of patients prescribed DMARD at 3 months (%) | No. of patients prescribed DMARD at 6 months (%) | No. of patients prescribed DMARD at 12 months (%) | No. of patients prescribed methotrexate at 3 months (%) | No. of patients prescribed methotrexate at 6 months (%) | No. of patients prescribed methotrexate at 12 months (%) | No. of patients prescribed combination DMARDs at 3 months (%) | No. of patients prescribed combination DMARDs at 6 months (%) | No. of patients prescribed combination DMARDs at 12 months (%) |
|------------------|-----------------|---------------------------|--------------------------------------------------|--------------------------------------------------|---------------------------------------------------|---------------------------------------------------------|---------------------------------------------------------|----------------------------------------------------------|---------------------------------------------------------------|---------------------------------------------------------------|----------------------------------------------------------------|
| North West       | 1995_1999       | 284                       | 70 (24.65%)                                      | 96 (33.80%)                                      | 111 (39.08%)                                      | 21 (7.39%)                                              | 28 (9.86%)                                              | 34 (11.97%)                                              | . (.%)                                                        | . (.%)                                                        | 1 (0.35%)                                                      |
|                  | 2000_2005       | 583                       | 215 (36.88%)                                     | 253 (43.40%)                                     | 277 (47.51%)                                      | 85 (14.58%)                                             | 111 (19.04%)                                            | 135 (23.16%)                                             | 8 (1.37%)                                                     | 11 (1.89%)                                                    | 23 (3.95%)                                                     |
|                  | 2006_April 2010 | 470                       | 247 (52.55%)                                     | 286 (60.85%)                                     | 309 (65.74%)                                      | 151 (32.13%)                                            | 178 (37.87%)                                            | 201 (42.77%)                                             | 28 (5.96%)                                                    | 44 (9.36%)                                                    | 60 (12.77%)                                                    |
| Northern Ireland | 1995_1999       | 53                        | 22 (41.51%)                                      | 24 (45.28%)                                      | 26 (49.06%)                                       | 4 (7.55%)                                               | 5 (9.43%)                                               | 6 (11.32%)                                               | 1 (1.89%)                                                     | 2 (3.77%)                                                     | 4 (7.55%)                                                      |
|                  | 2000_2005       | 135                       | 42 (31.11%)                                      | 53 (39.26%)                                      | 58 (42.96%)                                       | 21 (15.56%)                                             | 28 (20.74%)                                             | 38 (28.15%)                                              | 1 (0.74%)                                                     | 2 (1.48%)                                                     | 5 (3.70%)                                                      |
|                  | 2006_April 2010 | 144                       | 84 (58.33%)                                      | 97 (67.36%)                                      | 101 (70.14%)                                      | 69 (47.92%)                                             | 80 (55.56%)                                             | 87 (60.42%)                                              | 6 (4.17%)                                                     | 6 (4.17%)                                                     | 9 (6.25%)                                                      |
| Scotland         | 1995_1999       | 59                        | 22 (37.29%)                                      | 25 (42.37%)                                      | 27 (45.76%)                                       | 2 (3.39%)                                               | 4 (6.78%)                                               | 5 (8.47%)                                                | . (.%)                                                        | . (.%)                                                        | . (.%)                                                         |
|                  | 2000_2005       | 231                       | 101 (43.72%)                                     | 126 (54.55%)                                     | 139 (60.17%)                                      | 16 (6.93%)                                              | 18 (7.79%)                                              | 30 (12.99%)                                              | 2 (0.87%)                                                     | 3 (1.30%)                                                     | 7 (3.03%)                                                      |
|                  | 2006_April 2010 | 322                       | 206 (63.98%)                                     | 228 (70.81%)                                     | 237 (73.60%)                                      | 75 (23.29%)                                             | 94 (29.19%)                                             | 112 (34.78%)                                             | 14 (4.35%)                                                    | 22 (6.83%)                                                    | 33 (10.25%)                                                    |
| South Central    | 1995_1999       | 114                       | 32 (28.07%)                                      | 37 (32.46%)                                      | 40 (35.09%)                                       | 12 (10.53%)                                             | 13 (11.40%)                                             | 18 (15.79%)                                              | . (.%)                                                        | 1 (0.88%)                                                     | 1 (0.88%)                                                      |
|                  | 2000_2005       | 324                       | 123 (37.96%)                                     | 145 (44.75%)                                     | 164 (50.62%)                                      | 69 (21.30%)                                             | 90 (27.78%)                                             | 111 (34.26%)                                             | 11 (3.40%)                                                    | 18 (5.56%)                                                    | 35 (10.80%)                                                    |
|                  | 2006_April 2010 | 401                       | 215 (53.62%)                                     | 253 (63.09%)                                     | 268 (66.83%)                                      | 163 (40.65%)                                            | 192 (47.88%)                                            | 207 (51.62%)                                             | 33 (8.23%)                                                    | 52 (12.97%)                                                   | 67 (16.71%)                                                    |

| Region                 | Time period     | No. of patients diagnosed | No. of patients prescribed DMARD at 3 months (%) | No. of patients prescribed DMARD at 6 months (%) | No. of patients prescribed DMARD at 12 months (%) | No. of patients prescribed methotrexate at 3 months (%) | No. of patients prescribed methotrexate at 6 months (%) | No. of patients prescribed methotrexate at 12 months (%) | No. of patients prescribed combination DMARDs at 3 months (%) | No. of patients prescribed combination DMARDs at 6 months (%) | No. of patients prescribed combination DMARDs at 12 months (%) |
|------------------------|-----------------|---------------------------|--------------------------------------------------|--------------------------------------------------|---------------------------------------------------|---------------------------------------------------------|---------------------------------------------------------|----------------------------------------------------------|---------------------------------------------------------------|---------------------------------------------------------------|----------------------------------------------------------------|
| South East Coast       | 1995_1999       | 115                       | 20 (17.39%)                                      | 29 (25.22%)                                      | 40 (34.78%)                                       | 6 (5.22%)                                               | 10 (8.70%)                                              | 17 (14.78%)                                              | . (%)                                                         | . (%)                                                         | . (%)                                                          |
|                        | 2000_2005       | 327                       | 73 (22.32%)                                      | 96 (29.36%)                                      | 118 (36.09%)                                      | 48 (14.68%)                                             | 63 (19.27%)                                             | 83 (25.38%)                                              | 2 (0.61%)                                                     | 2 (0.61%)                                                     | 6 (1.83%)                                                      |
|                        | 2006_April 2010 | 290                       | 101 (34.83%)                                     | 130 (44.83%)                                     | 142 (48.97%)                                      | 72 (24.83%)                                             | 95 (32.76%)                                             | 104 (35.86%)                                             | 7 (2.41%)                                                     | 9 (3.10%)                                                     | 16 (5.52%)                                                     |
| South West             | 1995_1999       | 200                       | 51 (25.50%)                                      | 66 (33.00%)                                      | 79 (39.50%)                                       | 13 (6.50%)                                              | 20 (10.00%)                                             | 26 (13.00%)                                              | 1 (0.50%)                                                     | 1 (0.50%)                                                     | 5 (2.50%)                                                      |
|                        | 2000_2005       | 316                       | 133 (42.09%)                                     | 149 (47.15%)                                     | 167 (52.85%)                                      | 55 (17.41%)                                             | 63 (19.94%)                                             | 90 (28.48%)                                              | 2 (0.63%)                                                     | 2 (0.63%)                                                     | 14 (4.43%)                                                     |
|                        | 2006_April 2010 | 378                       | 180 (47.62%)                                     | 212 (56.08%)                                     | 242 (64.02%)                                      | 110 (29.10%)                                            | 139 (36.77%)                                            | 164 (43.39%)                                             | 11 (2.91%)                                                    | 21 (5.56%)                                                    | 30 (7.94%)                                                     |
| Wales                  | 1995_1999       | 169                       | 46 (27.22%)                                      | 55 (32.54%)                                      | 56 (33.14%)                                       | 5 (2.96%)                                               | 12 (7.10%)                                              | 17 (10.06%)                                              | . (%)                                                         | . (%)                                                         | 1 (0.59%)                                                      |
|                        | 2000_2005       | 338                       | 92 (27.22%)                                      | 112 (33.14%)                                     | 137 (40.53%)                                      | 28 (8.28%)                                              | 42 (12.43%)                                             | 53 (15.68%)                                              | . (%)                                                         | 1 (0.30%)                                                     | 2 (0.59%)                                                      |
|                        | 2006_April 2010 | 271                       | 112 (41.33%)                                     | 136 (50.18%)                                     | 149 (54.98%)                                      | 69 (25.46%)                                             | 88 (32.47%)                                             | 105 (38.75%)                                             | 2 (0.74%)                                                     | 4 (1.48%)                                                     | 13 (4.80%)                                                     |
| West Midlands          | 1995_1999       | 152                       | 40 (26.32%)                                      | 50 (32.89%)                                      | 61 (40.13%)                                       | 2 (1.32%)                                               | 5 (3.29%)                                               | 12 (7.89%)                                               | . (%)                                                         | 2 (1.32%)                                                     | 3 (1.97%)                                                      |
|                        | 2000_2005       | 497                       | 140 (28.17%)                                     | 201 (40.44%)                                     | 227 (45.67%)                                      | 43 (8.65%)                                              | 82 (16.50%)                                             | 102 (20.52%)                                             | . (%)                                                         | . (%)                                                         | 6 (1.21%)                                                      |
|                        | 2006_April 2010 | 366                       | 147 (40.16%)                                     | 185 (50.55%)                                     | 213 (58.20%)                                      | 89 (24.32%)                                             | 123 (33.61%)                                            | 146 (39.89%)                                             | 8 (2.19%)                                                     | 15 (4.10%)                                                    | 29 (7.92%)                                                     |
| Yorkshire & The Humber | 1995_1999       | 156                       | 33 (21.15%)                                      | 47 (30.13%)                                      | 54 (34.62%)                                       | 7 (4.49%)                                               | 12 (7.69%)                                              | 16 (10.26%)                                              | . (%)                                                         | . (%)                                                         | . (%)                                                          |
|                        | 2000_2005       | 277                       | 90 (32.49%)                                      | 107 (38.63%)                                     | 125 (45.13%)                                      | 37 (13.36%)                                             | 49 (17.69%)                                             | 67 (24.19%)                                              | 2 (0.72%)                                                     | 7 (2.53%)                                                     | 13 (4.69%)                                                     |
|                        | 2006_April 2010 | 169                       | 50 (29.59%)                                      | 65 (38.46%)                                      | 80 (47.34%)                                       | 33 (19.53%)                                             | 42 (24.85%)                                             | 58 (34.32%)                                              | 1 (0.59%)                                                     | 2 (1.18%)                                                     | 5 (2.96%)                                                      |



Appendix 3: Baseline characteristics for the incident RA patients (N=15,259)

| Characteristic                                        | Incident RA Patients<br>(N=15,259) | Matched Controls<br>(N=45,777) | Crude Odds Ratio<br>(95% CI) |
|-------------------------------------------------------|------------------------------------|--------------------------------|------------------------------|
| Age 18–29 years                                       | 418 (2.7%)                         | 1,254 (2.7%)                   | *                            |
| Age 30–39 years                                       | 1,139 (7.5%)                       | 3,417 (7.5%)                   | *                            |
| Age 40–49 years                                       | 2,035 (13.3%)                      | 6,105 (13.3%)                  | *                            |
| Age 50–59 years                                       | 3,387 (22.2%)                      | 10,161 (22.2%)                 | *                            |
| Age 60–69 years                                       | 3,513 (23.0%)                      | 10,539 (23.0%)                 | *                            |
| Age 70–79 years                                       | 3,136 (20.6%)                      | 9,408 (20.6%)                  | *                            |
| Age 80+ years                                         | 1,631 (10.7%)                      | 4,893 (10.7%)                  | *                            |
| Female gender (%)                                     | 10,565 (69.2%)                     | 31,695 (69.2%)                 | *                            |
| Year of diagnosis:                                    |                                    |                                |                              |
| 1995                                                  | 589 (3.9%)                         | 1,767 (3.9%)                   | *                            |
| 1996                                                  | 563 (3.7%)                         | 1,689 (3.7%)                   | *                            |
| 1997                                                  | 659 (4.3%)                         | 1,977 (4.3%)                   | *                            |
| 1998                                                  | 709 (4.6%)                         | 2,127 (4.6%)                   | *                            |
| 1999                                                  | 780 (5.1%)                         | 2,340 (5.1%)                   | *                            |
| 2000                                                  | 981 (6.4%)                         | 2,943 (6.4%)                   | *                            |
| 2001                                                  | 1,171 (7.7%)                       | 3,513 (7.7%)                   | *                            |
| 2002                                                  | 1,321 (8.7%)                       | 3,963 (8.7%)                   | *                            |
| 2003                                                  | 1,308 (8.6%)                       | 3,924 (8.6%)                   | *                            |
| 2004                                                  | 1,306 (8.6%)                       | 3,918 (8.6%)                   | *                            |
| 2005                                                  | 1,204 (7.9%)                       | 3,612 (7.9%)                   | *                            |
| 2006                                                  | 1,195 (7.8%)                       | 3,585 (7.8%)                   | *                            |
| 2007                                                  | 1,113 (7.3%)                       | 3,339 (7.3%)                   | *                            |
| 2008                                                  | 1,068 (7.0%)                       | 3,204 (7.0%)                   | *                            |
| 2009                                                  | 1,098 (7.2%)                       | 3,294 (7.2%)                   | *                            |
| 2010                                                  | 194 (1.3%)                         | 582 (1.3%)                     | *                            |
| Length of follow-up<br>(mean, years)                  | 5.2                                | 4.9                            | *                            |
| Smoking status <sup>1</sup>                           |                                    |                                |                              |
| Non smoker (%)                                        | 6,453 (42.3%)                      | 22,052 (48.2%)                 | Reference                    |
| Ex smoker (%)                                         | 3,747 (24.6%)                      | 9,230 (20.2%)                  | 1.45 (1.38 - 1.53)           |
| Smoker (%)                                            | 3,798 (24.9%)                      | 8,862 (19.4%)                  | 1.51 (1.43 - 1.58)           |
| History of a presenting symptom<br>(any) <sup>2</sup> | 10,091 (66.1%)                     | 15,015 (32.8%)                 | 4.99 (4.77 - 5.22)           |
| Joint pain (%)                                        | 9,275 (60.8%)                      | 13,118 (28.7%)                 | 4.73 (4.53 - 4.95)           |
| Swollen tender joints (%)                             | 1,587 (10.4%)                      | 1,543 (3.4%)                   | 3.53 (3.27 - 3.81)           |
| Morning stiffness (%)                                 | 701 (4.6%)                         | 465 (1.0%)                     | 4.77 (4.22 - 5.38)           |
| Previous prescribing of <sup>3</sup> :                |                                    |                                |                              |
| Steroid injections                                    | 704 (4.6%)                         | 316 (0.7%)                     | 7.30 (6.36 - 8.39)           |
| Prednisolone                                          | 2,732 (17.9%)                      | 990 (2.2%)                     | 10.03 (9.26 - 10.86)         |
| NSAIDs                                                | 10,698 (70.1%)                     | 10,305 (22.5%)                 | 8.95 (8.54 - 9.38)           |
| Analgesics/ opioids                                   | 1,801 (11.8%)                      | 1,275 (2.8%)                   | 4.84 (4.48 - 5.23)           |
| H2 antagonists and PPIs                               | 3,971 (26.0%)                      | 5,302 (11.6%)                  | 2.89 (2.75 - 3.03)           |
| Statins                                               | 1,847 (12.1%)                      | 5,348 (11.7%)                  | 1.05 (0.99 - 1.12)           |
| Aspirin                                               | 1,975 (12.9%)                      | 5,726 (12.5%)                  | 1.05 (0.99 - 1.11)           |
| Antihypertensives                                     | 4,581 (30.0%)                      | 12,573 (27.5%)                 | 1.16 (1.11 - 1.22)           |
| Diabetic medications                                  | 745 (4.9%)                         | 2,013 (4.4%)                   | 1.12 (1.03 - 1.22)           |

<sup>1</sup>Patients were matched on this variable.

<sup>2</sup>Smoking status not known in 1,261 (8.3%) and 5,633 (12.3%) of RA patients and matched controls, respectively.

<sup>3</sup>Medical records were analysed in the 5 years before index date.

<sup>3</sup>Prescriptions were analysed in the six months before index date.

Appendix 4: Incidence rates and point prevalence of RA in the GPRD 2009

| Region                 | Person years at risk (years) | Incident RA cases 2009 | Incidence rate per 100,000 persons (30/06/09) | GPRD Population 2009 | RA Cases 2009 | Point Prevalence per 100,000 persons (30/06/09) |
|------------------------|------------------------------|------------------------|-----------------------------------------------|----------------------|---------------|-------------------------------------------------|
| North East             | 85016.28                     | 34                     | 0.400                                         | 84831                | 491           | 5.788                                           |
| North West             | 534355.5                     | 146                    | 0.273                                         | 544693               | 2,930         | 5.379                                           |
| Yorkshire & The Humber | 123289.3                     | 34                     | 0.276                                         | 123910               | 770           | 6.214                                           |
| East Midlands          | 123771.1                     | 31                     | 0.250                                         | 130367               | 781           | 5.991                                           |
| West Midlands          | 363201.7                     | 111                    | 0.306                                         | 374308               | 2,074         | 5.541                                           |
| East of England        | 377678                       | 96                     | 0.254                                         | 389617               | 2,041         | 5.238                                           |
| South West             | 349426.3                     | 125                    | 0.358                                         | 354863               | 1,918         | 5.405                                           |
| South Central          | 474538                       | 106                    | 0.223                                         | 483299               | 2,250         | 4.656                                           |
| London                 | 514153.7                     | 113                    | 0.220                                         | 519717               | 1,877         | 3.612                                           |
| South East Coast       | 381501.3                     | 89                     | 0.233                                         | 387344               | 1,718         | 4.435                                           |
| Northern Ireland       | 121126.8                     | 35                     | 0.289                                         | 124176               | 725           | 5.838                                           |
| Scotland               | 339703.9                     | 97                     | 0.286                                         | 343287               | 1,676         | 4.882                                           |
| Wales                  | 331040.5                     | 81                     | 0.245                                         | 338133               | 1,787         | 5.285                                           |

STROBE Statement—Checklist of items that should be included in reports of *cohort studies*

|                              | Item No | Recommendation                                                                                                                                                                                                                                                                                                                                    |
|------------------------------|---------|---------------------------------------------------------------------------------------------------------------------------------------------------------------------------------------------------------------------------------------------------------------------------------------------------------------------------------------------------|
| <b>Title and abstract</b>    | 1       | (a) Indicate the study's design with a commonly used term in the title or the abstract<br><b>Done – page 1 and 2 of PDF proof</b>                                                                                                                                                                                                                 |
|                              |         | (b) Provide in the abstract an informative and balanced summary of what was done and what was found<br><b>Done – page 2 of PDF proof</b>                                                                                                                                                                                                          |
| <b>Introduction</b>          |         |                                                                                                                                                                                                                                                                                                                                                   |
| Background/rationale         | 2       | Explain the scientific background and rationale for the investigation being reported<br><b>Done – page 3 of PDF proof</b>                                                                                                                                                                                                                         |
| Objectives                   | 3       | State specific objectives, including any prespecified hypotheses<br><b>Done – page 3 of PDF proof</b>                                                                                                                                                                                                                                             |
| <b>Methods</b>               |         |                                                                                                                                                                                                                                                                                                                                                   |
| Study design                 | 4       | Present key elements of study design early in the paper<br><b>Done – page 4 of PDF proof</b>                                                                                                                                                                                                                                                      |
| Setting                      | 5       | Describe the setting, locations, and relevant dates, including periods of recruitment, exposure, follow-up, and data collection<br><b>Done – page 4 of PDF proof</b>                                                                                                                                                                              |
| Participants                 | 6       | (a) Give the eligibility criteria, and the sources and methods of selection of participants. Describe methods of follow-up<br><b>Done – page 4 of PDF proof</b>                                                                                                                                                                                   |
|                              |         | (b) For matched studies, give matching criteria and number of exposed and unexposed<br><b>Done – page 4 of PDF proof</b>                                                                                                                                                                                                                          |
| Variables                    | 7       | Clearly define all outcomes, exposures, predictors, potential confounders, and effect modifiers. Give diagnostic criteria, if applicable<br><b>Done – page 4 of PDF proof</b>                                                                                                                                                                     |
| Data sources/<br>measurement | 8*      | For each variable of interest, give sources of data and details of methods of assessment (measurement). Describe comparability of assessment methods if there is more than one group<br><b>Done – page 4 of PDF proof</b>                                                                                                                         |
| Bias                         | 9       | Describe any efforts to address potential sources of bias<br><b>Done – page 8, 23 and 24 of PDF</b>                                                                                                                                                                                                                                               |
| Study size                   | 10      | Explain how the study size was arrived at ( <b>Not applicable – this is a descriptive study without definition of any a-priori hypothesis</b> )                                                                                                                                                                                                   |
| Quantitative variables       | 11      | Explain how quantitative variables were handled in the analyses. If applicable, describe which groupings were chosen and why ( <b>Not applicable</b> )                                                                                                                                                                                            |
| Statistical methods          | 12      | (a) Describe all statistical methods, including those used to control for confounding<br>(b) Describe any methods used to examine subgroups and interactions<br>(c) Explain how missing data were addressed<br>(d) If applicable, explain how loss to follow-up was addressed<br>(e) Describe any sensitivity analyses<br><b>(Not applicable)</b> |
| <b>Results</b>               |         |                                                                                                                                                                                                                                                                                                                                                   |
| Participants                 | 13*     | (a) Report numbers of individuals at each stage of study—eg numbers potentially eligible, examined for eligibility, confirmed eligible, included in the study, completing follow-up, and analysed                                                                                                                                                 |

|                          |     |                                                                                                                                                                                                                     |
|--------------------------|-----|---------------------------------------------------------------------------------------------------------------------------------------------------------------------------------------------------------------------|
|                          |     | <b>Done – page 5 and 23 of PDF proof</b>                                                                                                                                                                            |
|                          |     | (b) Give reasons for non-participation at each stage ( <b>Not applicable</b> )                                                                                                                                      |
|                          |     | (c) Consider use of a flow diagram ( <b>Not applicable</b> )                                                                                                                                                        |
| Descriptive data         | 14* | (a) Give characteristics of study participants (eg demographic, clinical, social) and information on exposures and potential confounders<br><b>Done – page 5 and 23 of PDF proof</b>                                |
|                          |     | (b) Indicate number of participants with missing data for each variable of interest ( <b>Not applicable</b> )                                                                                                       |
|                          |     | (c) Summarise follow-up time (eg, average and total amount)<br><b>Done – page 4 of PDF proof</b>                                                                                                                    |
| Outcome data             | 15* | Report numbers of outcome events or summary measures over time<br><b>Done – page 5 and 6 of PDF proof</b>                                                                                                           |
| Main results             | 16  | (a) Give unadjusted estimates and, if applicable, confounder-adjusted estimates and their precision (eg, 95% confidence interval). Make clear which confounders were adjusted for and why they were included        |
|                          |     | (b) Report category boundaries when continuous variables were categorized                                                                                                                                           |
|                          |     | (c) If relevant, consider translating estimates of relative risk into absolute risk for a meaningful time period ( <b>Not applicable</b> )                                                                          |
| Other analyses           | 17  | Report other analyses done—eg analyses of subgroups and interactions, and sensitivity analyses ( <b>Not applicable</b> )                                                                                            |
| <b>Discussion</b>        |     |                                                                                                                                                                                                                     |
| Key results              | 18  | Summarise key results with reference to study objectives<br><b>Done – pages 6, 7 and 8 of PDF proof</b>                                                                                                             |
| Limitations              | 19  | Discuss limitations of the study, taking into account sources of potential bias or imprecision. Discuss both direction and magnitude of any potential bias<br><b>Done – pages 8 and 9 of PDF proof</b>              |
| Interpretation           | 20  | Give a cautious overall interpretation of results considering objectives, limitations, multiplicity of analyses, results from similar studies, and other relevant evidence<br><b>Done – pages 6–10 of PDF proof</b> |
| Generalisability         | 21  | Discuss the generalisability (external validity) of the study results<br><b>Done – pages 6–10 of PDF proof</b>                                                                                                      |
| <b>Other information</b> |     |                                                                                                                                                                                                                     |
| Funding                  | 22  | Give the source of funding and the role of the funders for the present study and, if applicable, for the original study on which the present article is based<br><b>Done – page 11 of PDF proof</b>                 |

\*Give information separately for exposed and unexposed groups.

**Note:** An Explanation and Elaboration article discusses each checklist item and gives methodological background and published examples of transparent reporting. The STROBE checklist is best used in conjunction with this article (freely available on the Web sites of PLoS Medicine at <http://www.plosmedicine.org/>, Annals of Internal Medicine at <http://www.annals.org/>, and Epidemiology at <http://www.epidem.com/>). Information on the STROBE Initiative is available at <http://www.strobe-statement.org>.
